# Supplementary material
Source: PubMed Central journal article supplement (PMC4470619)
Supplement: NIHMS694691-supplement-Supplementala.pdf [file NIHMS694691-supplement-Supplementala.pdf]

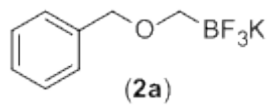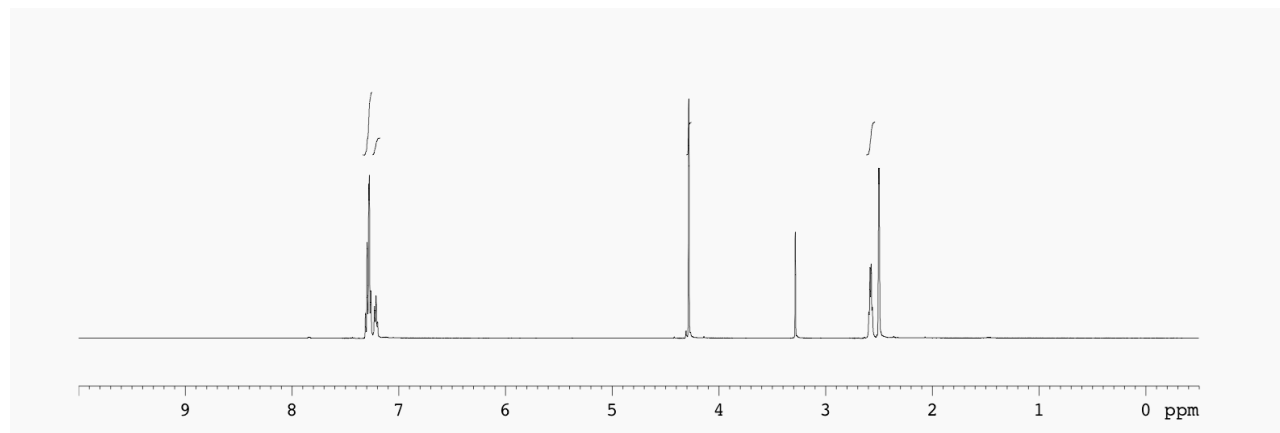

$^1\text{H}$  NMR (500 MHz,  $\text{DMSO-}d_6$ ) Spectrum of Benzyloxymethyltrifluoroborate (**2a**)

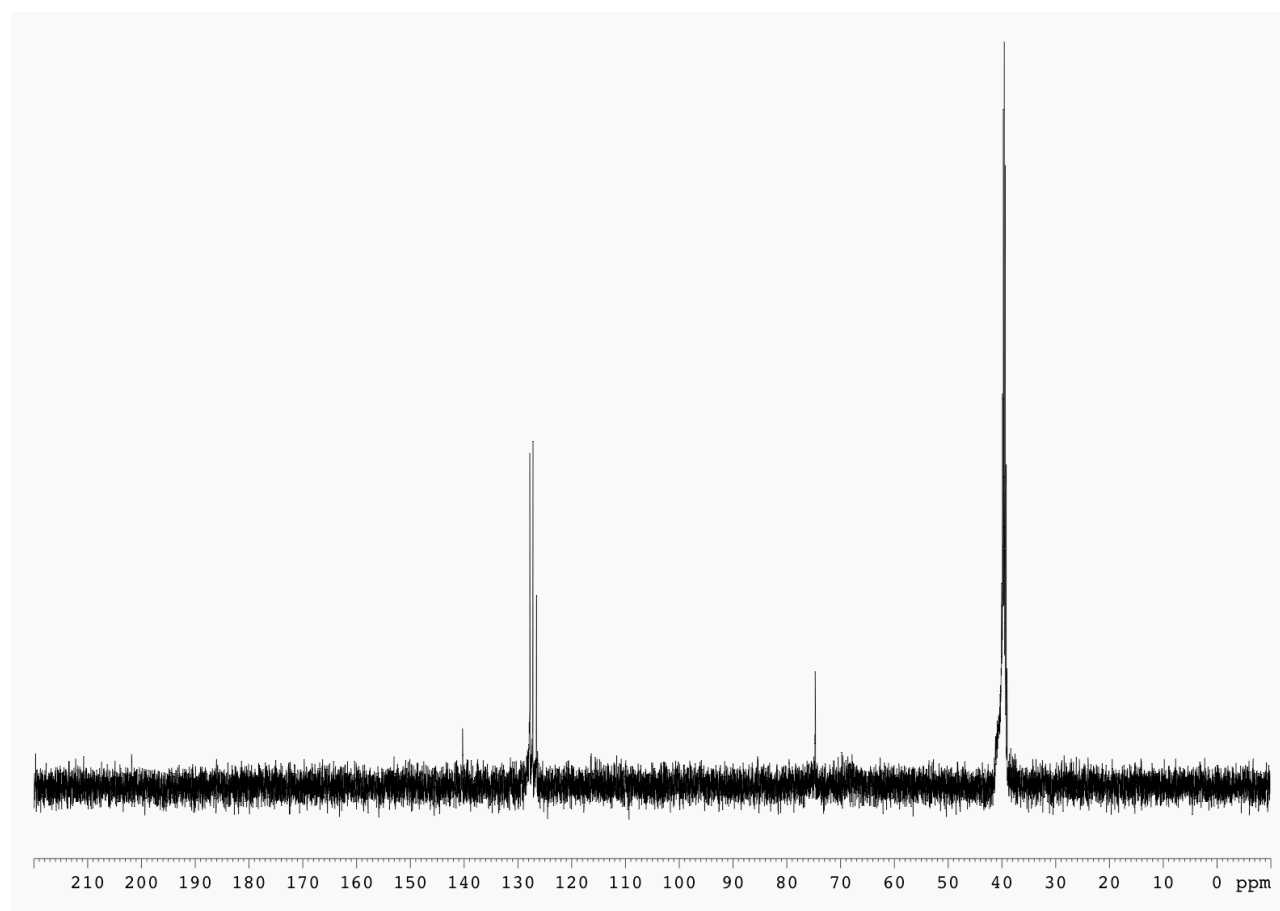

$^{13}\text{C}$  NMR (125.8 MHz,  $\text{DMSO-}d_6$ ) Spectrum of Benzyloxymethyltrifluoroborate (**2a**)

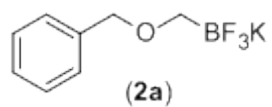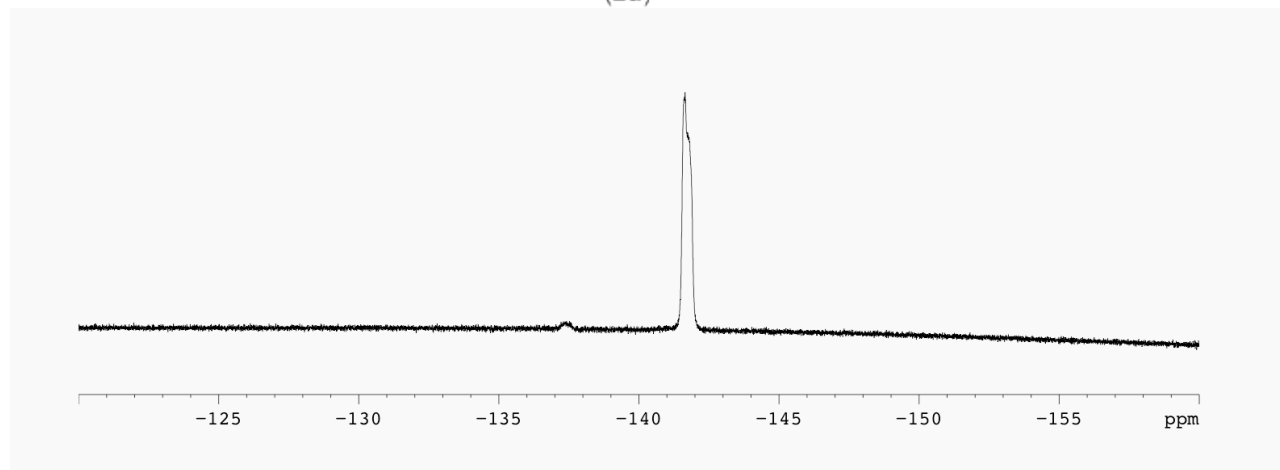

$^{19}\text{F}$  NMR (470.8 MHz,  $\text{DMSO-}d_6$ ) Spectrum of Benzyloxymethyltrimethyltrifluoroborate (2a)

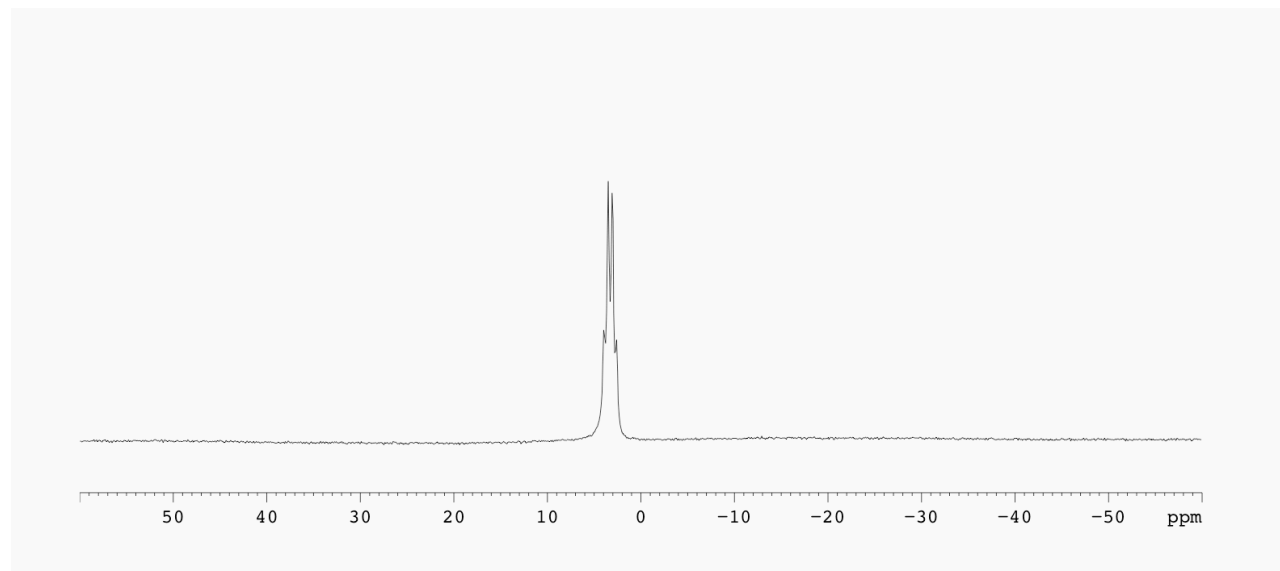

$^{11}\text{B}$  NMR (128.4 MHz, Acetonitrile) Spectrum of Benzyloxymethyltrimethyltrifluoroborate (2a)

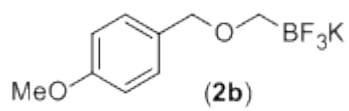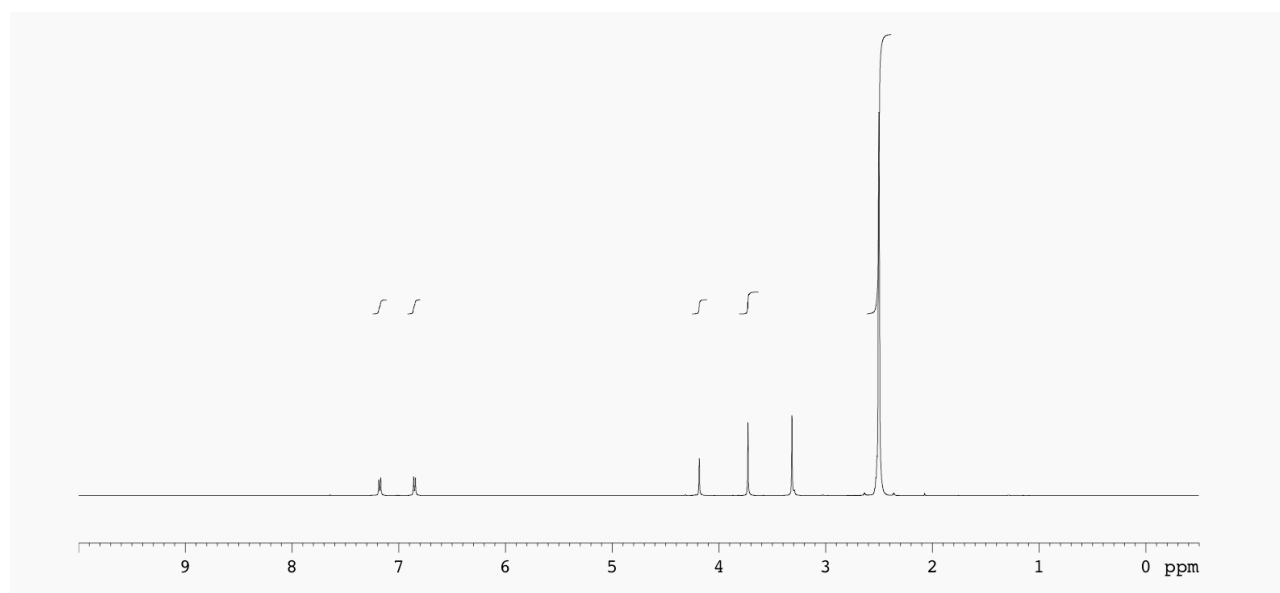

$^1\text{H}$  NMR (500 MHz,  $\text{DMSO-}d_6$ ) Spectrum of Potassium-(4-Methoxybenzyloxy)methyltrifluoroborate (**2b**)

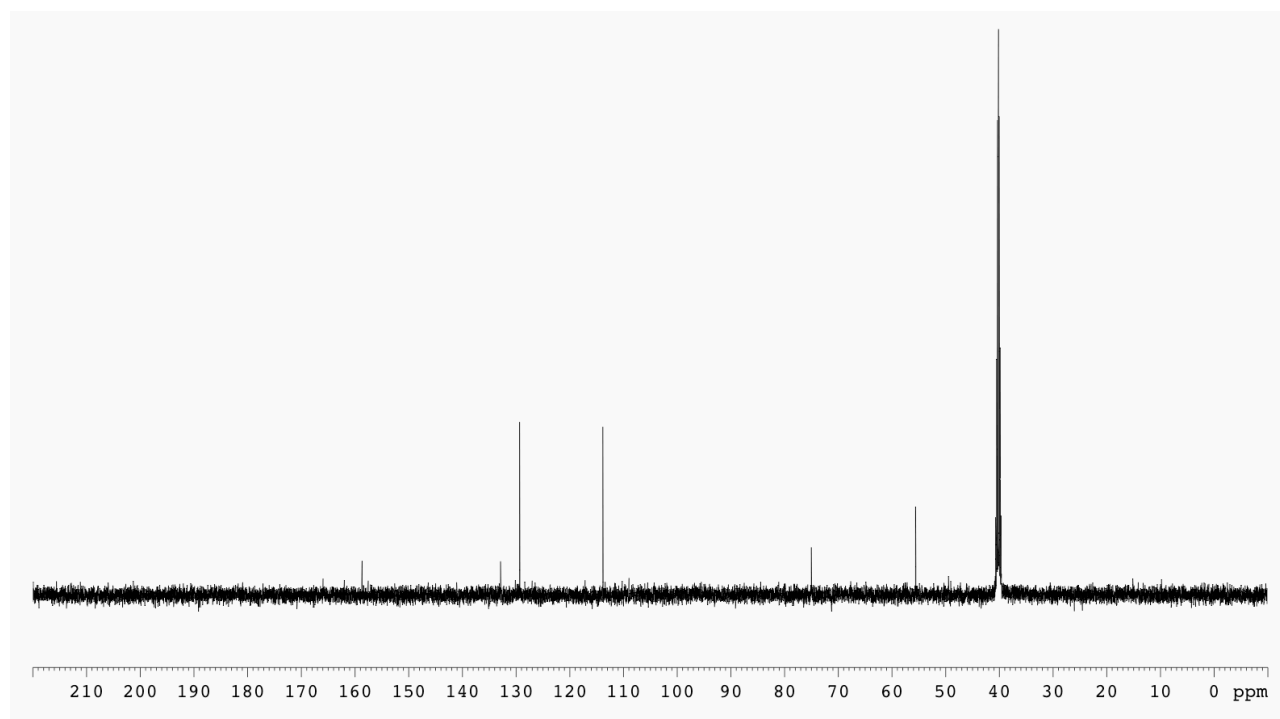

$^{13}\text{C}$  NMR (125.8 MHz,  $\text{DMSO-}d_6$ ) Spectrum of Potassium-(4-Methoxybenzyloxy)methyltrifluoroborate (**2b**)

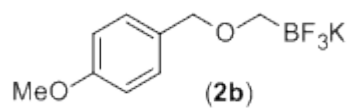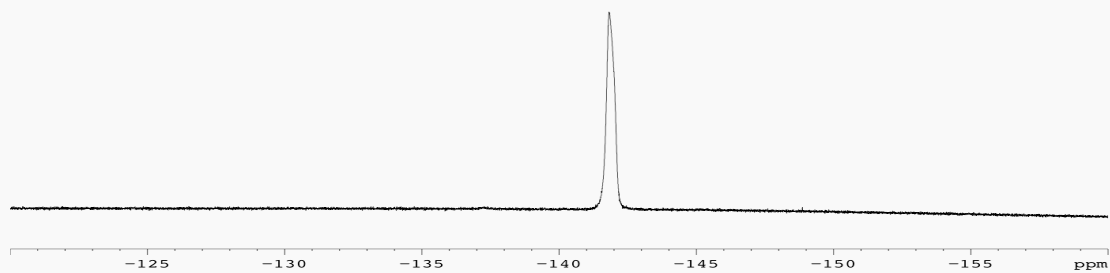

$^{19}\text{F}$  NMR (470.8 MHz,  $\text{DMSO-}d_6$ ) Spectrum of Potassium-(4-Methoxybenzyloxy)methyltrifluoroborate (**2b**)

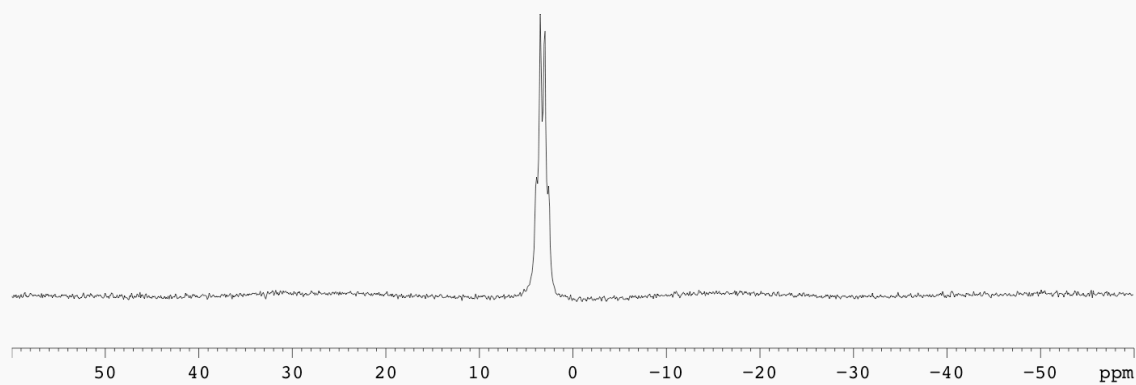

$^{11}\text{B}$  NMR (128.4 MHz, Acetonitrile) Spectrum of Potassium-(4-Methoxybenzyloxy)methyltrifluoroborate (**2b**)

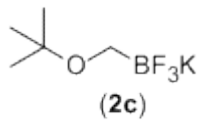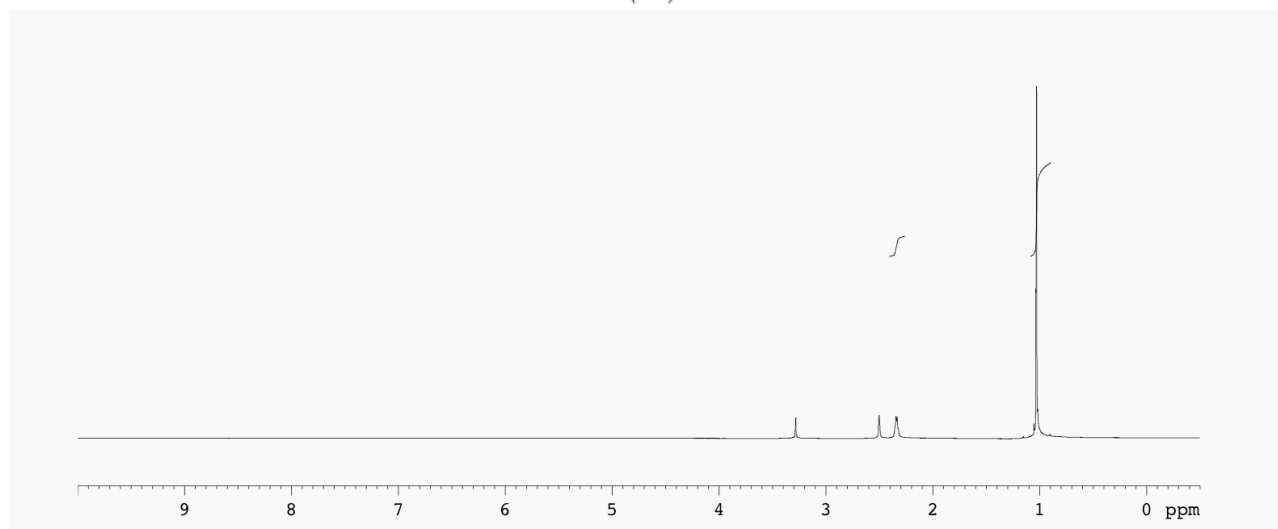

<sup>1</sup>H NMR (500 MHz, DMSO-*d*<sub>6</sub>) Spectrum of Potassium *t*-Butoxymethyltrifluoroborate (2c)

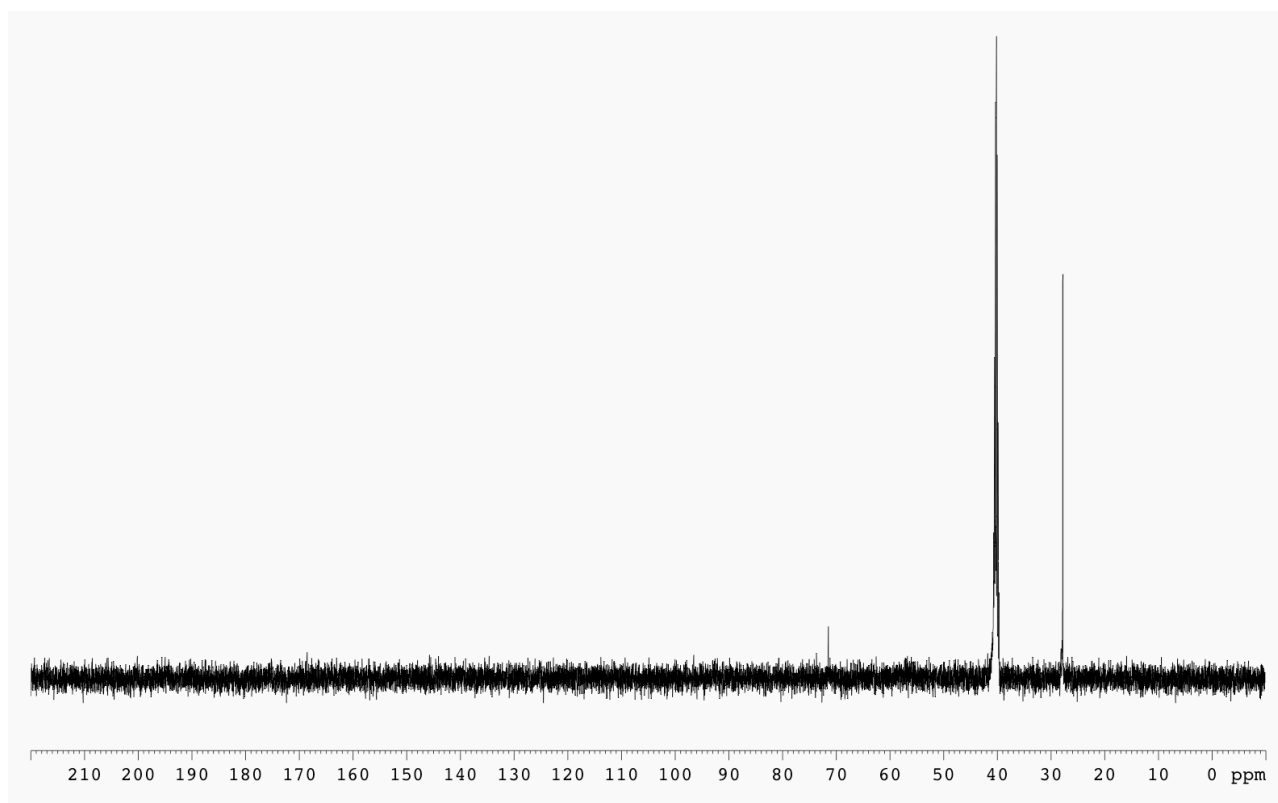

<sup>13</sup>C NMR (125.8 MHz, DMSO-*d*<sub>6</sub>) Spectrum of Potassium *t*-Butoxymethyltrifluoroborate (2c)

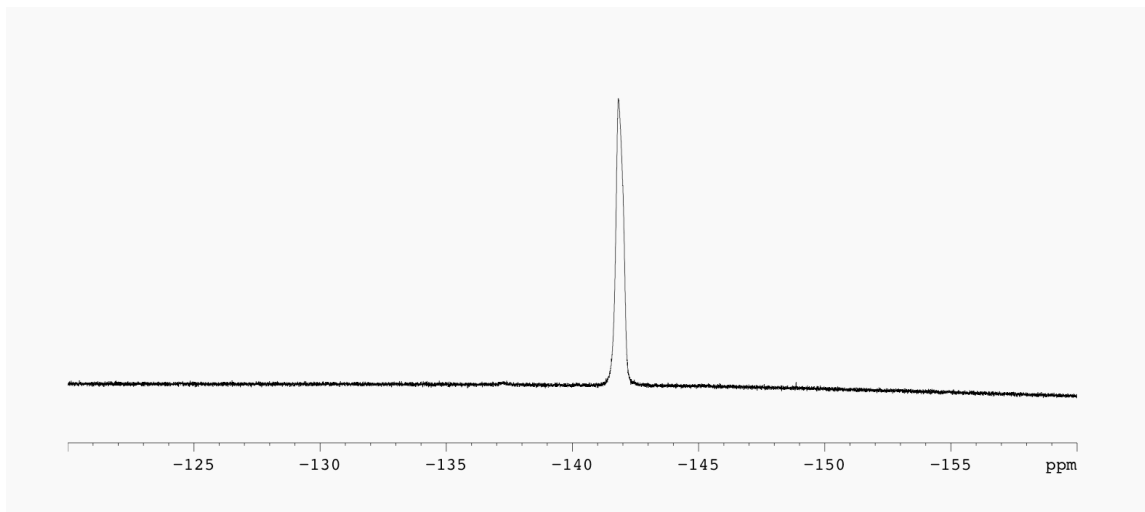

$^{19}\text{F}$  NMR (470.8 MHz,  $\text{DMSO-}d_6$ ) Spectrum of Potassium *t*-Butoxymethyltrifluoroborate (2c)

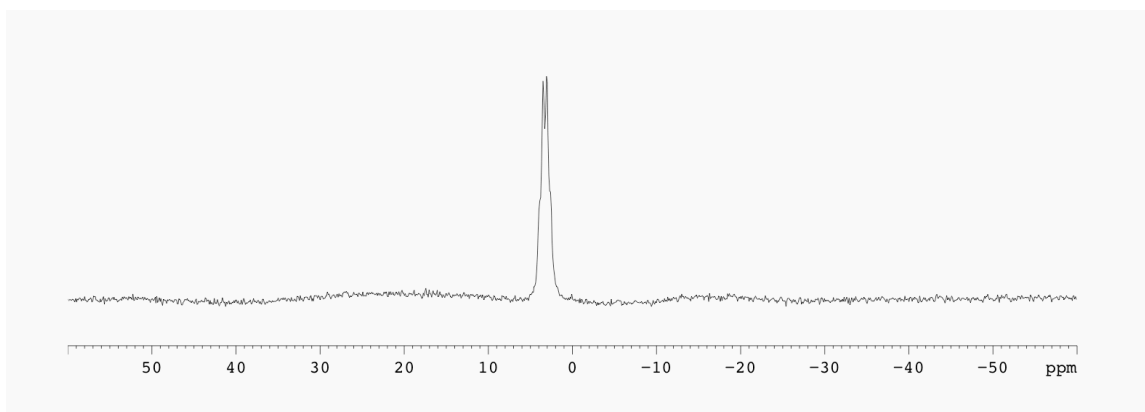

$^{11}\text{B}$  NMR (128.4 MHz, Acetonitrile) Spectrum of Potassium *t*-Butoxymethyltrifluoroborate (2c)

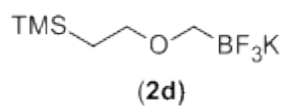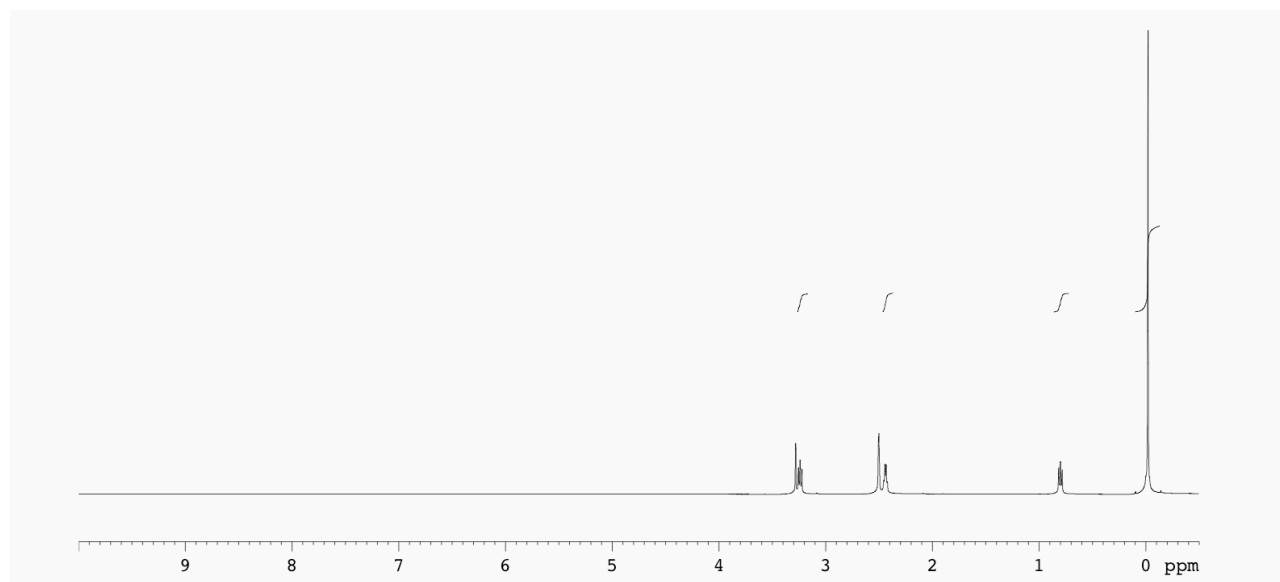

<sup>1</sup>H NMR (500 MHz, DMSO-*d*<sub>6</sub>) Spectrum of Potassium (2-(Trimethylsilyl)ethoxy)methyltrifluoroborate (2d)

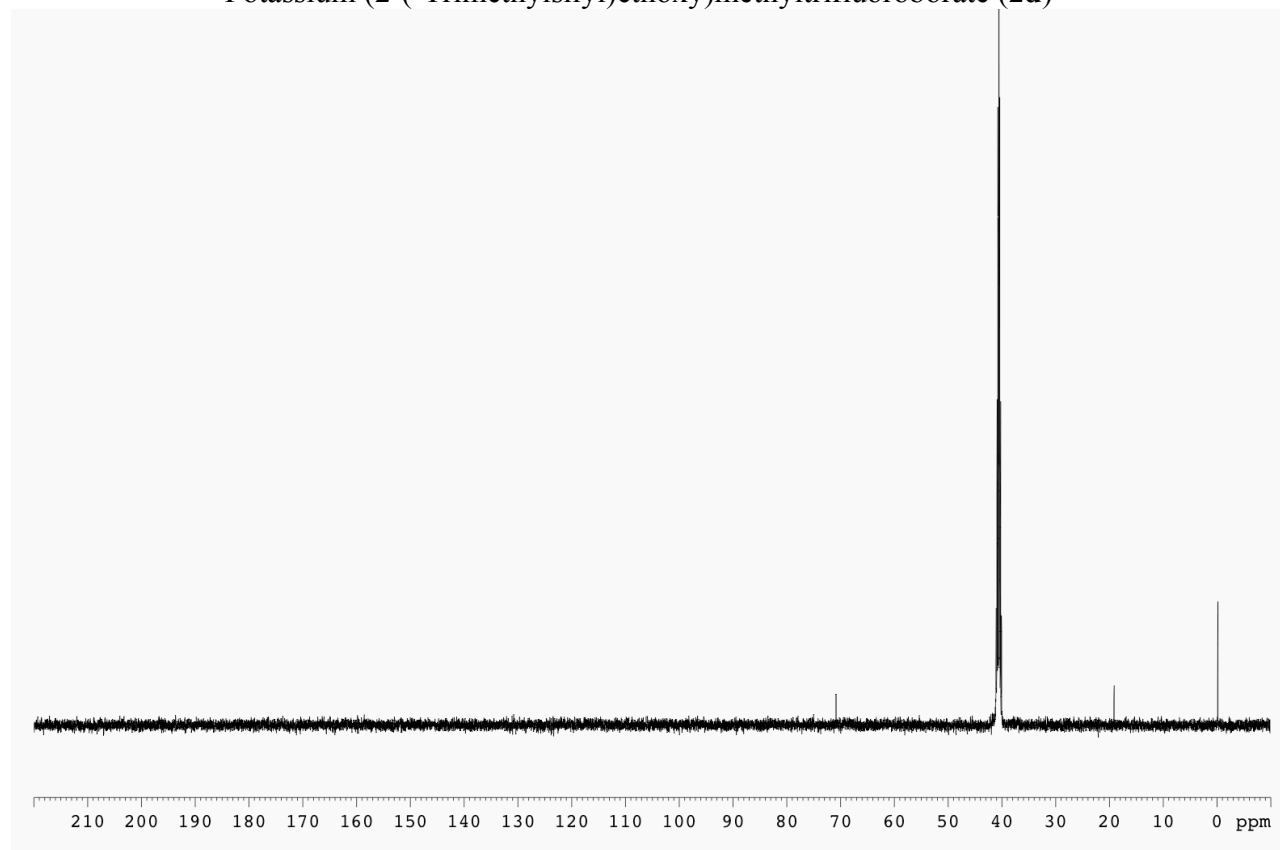

<sup>13</sup>C NMR (125.8 MHz, DMSO-*d*<sub>6</sub>) Spectrum of Potassium (2-(Trimethylsilyl)ethoxy)methyltrifluoroborate (2d)

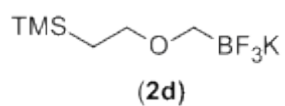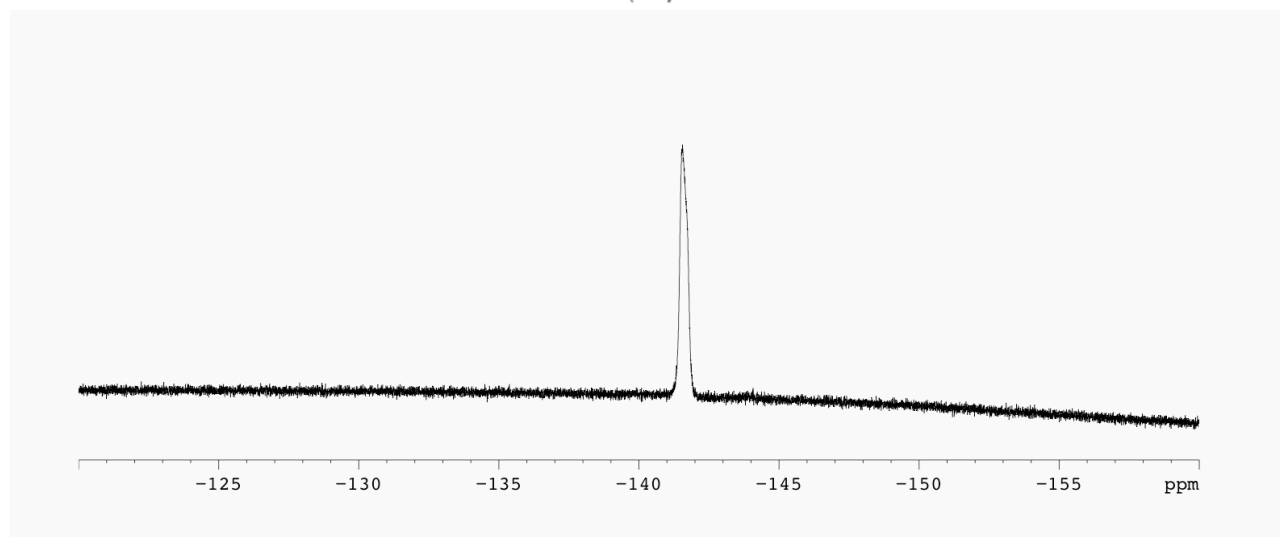

$^{19}\text{F}$  NMR (470.8 MHz,  $\text{DMSO-}d_6$ ) Spectrum of Potassium (2-(Trimethylsilyl)ethoxy)methyltrifluoroborate (**2d**)

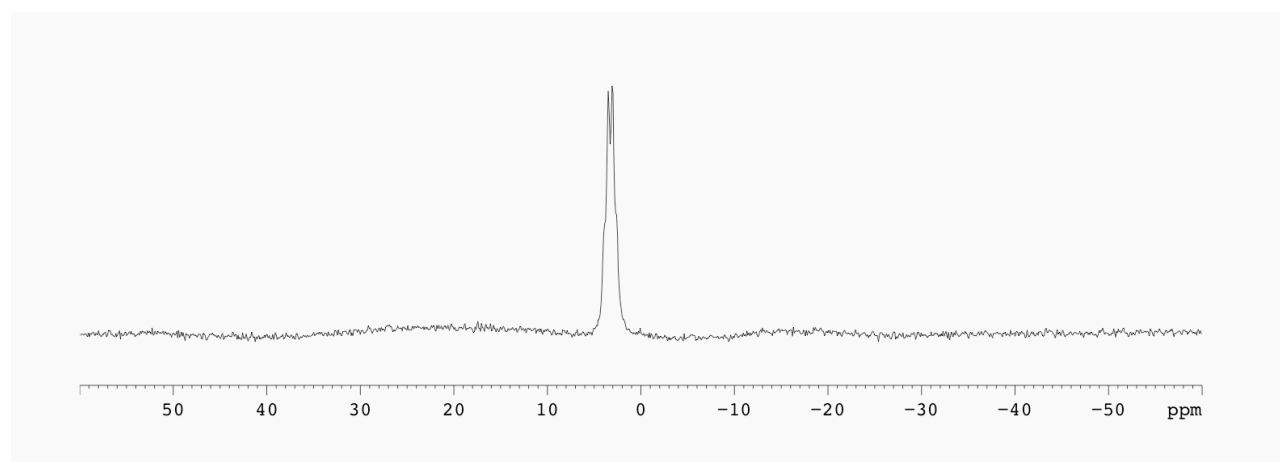

$^{11}\text{B}$  NMR (128.4 MHz, Acetonitrile) Spectrum of Potassium (2-(Trimethylsilyl)ethoxy)methyltrifluoroborate (**2d**)



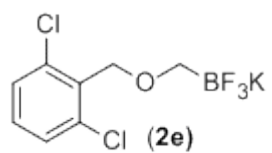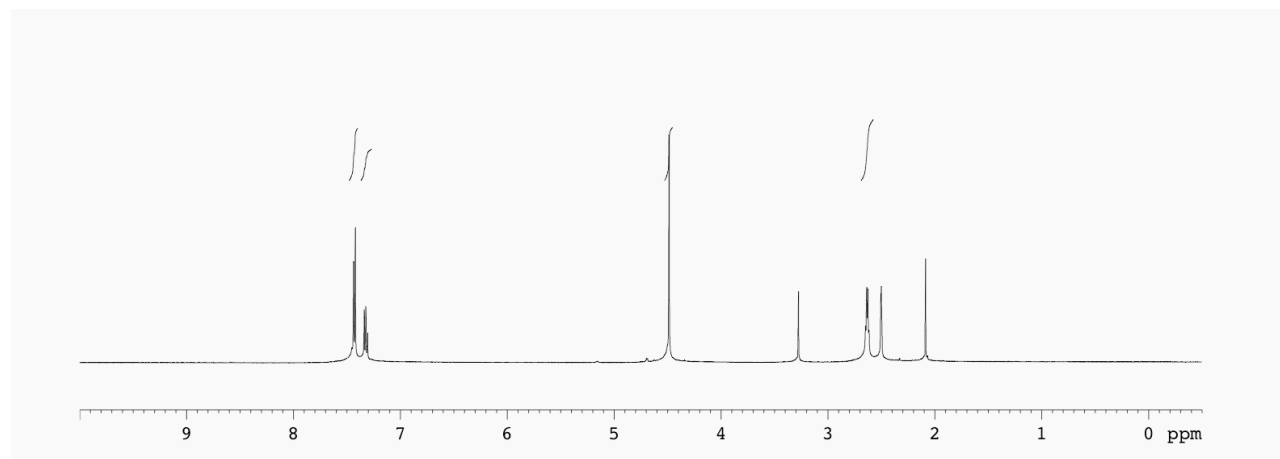

<sup>1</sup>H NMR (500 MHz, DMSO-*d*<sub>6</sub>) Spectrum of Potassium (2,6-Dichlorobenzoyloxy)methyltrifluoroborate (**2e**)

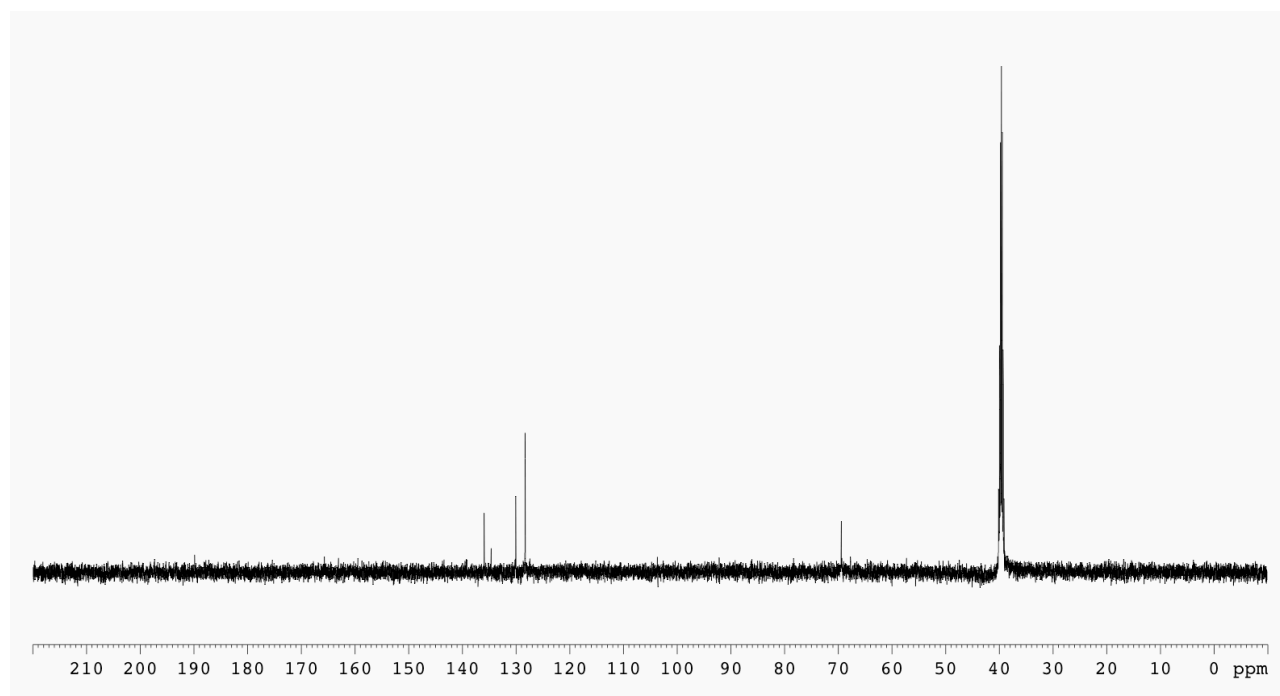

<sup>13</sup>C NMR (125.8 MHz, DMSO-*d*<sub>6</sub>) Spectrum of Potassium (2,6-Dichlorobenzoyloxy)methyltrifluoroborate (**2e**)

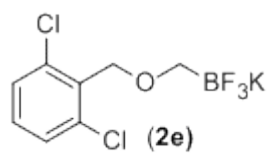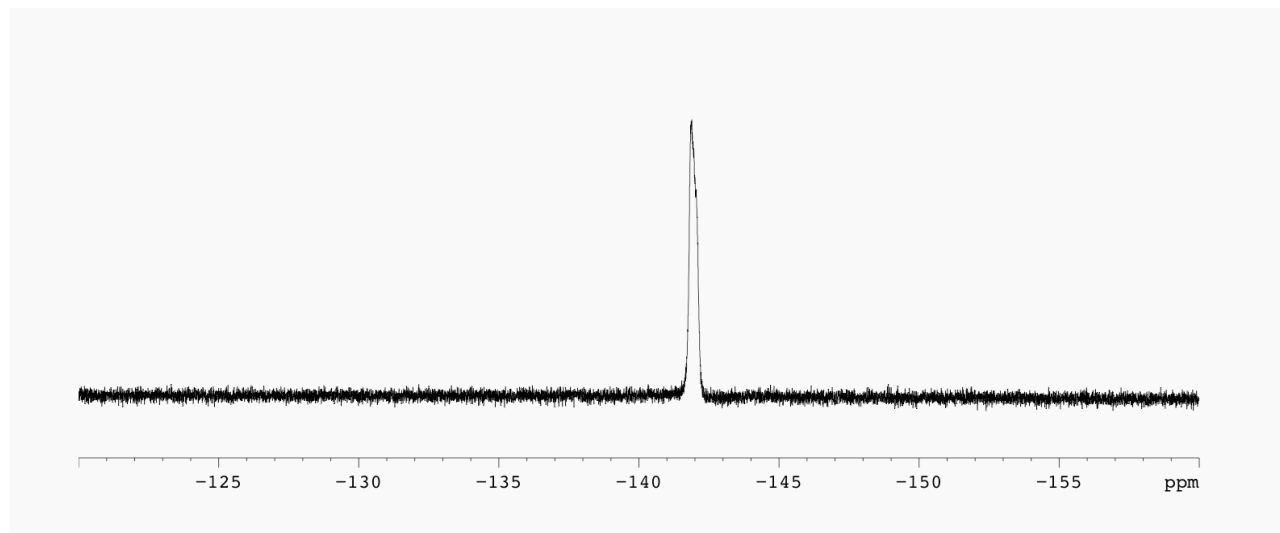

$^{19}\text{F}$  NMR (470.8 MHz,  $\text{DMSO-}d_6$ ) Spectrum of Potassium (2,6-Dichlorobenzoyloxy)methyltrifluoroborate (2e)

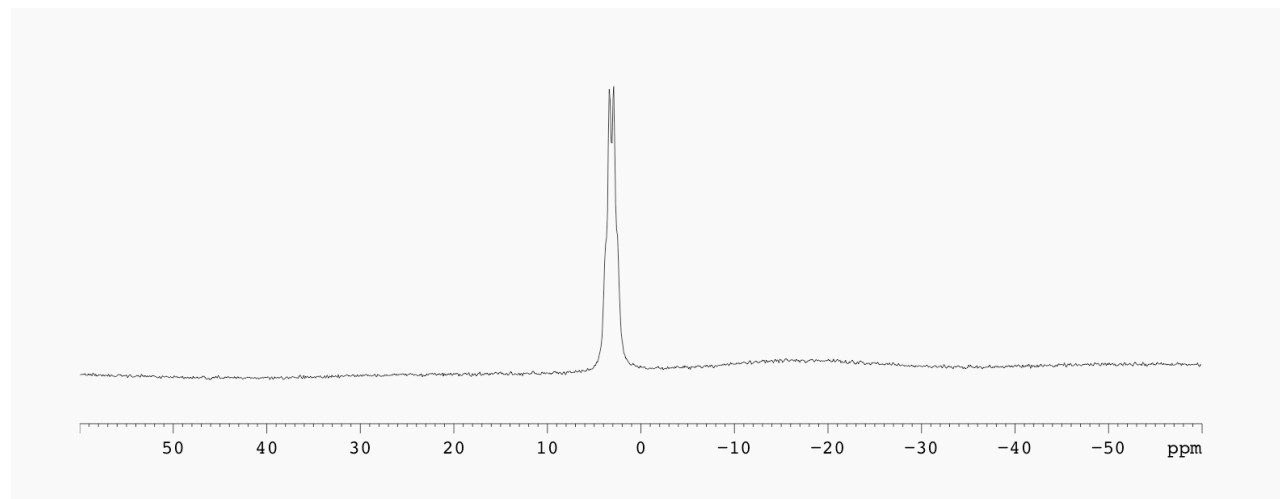

$^{11}\text{B}$  NMR (128.4 MHz, Acetonitrile) Spectrum of Potassium (2,6-Dichlorobenzoyloxy)methyltrifluoroborate (2e)

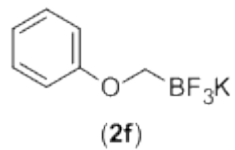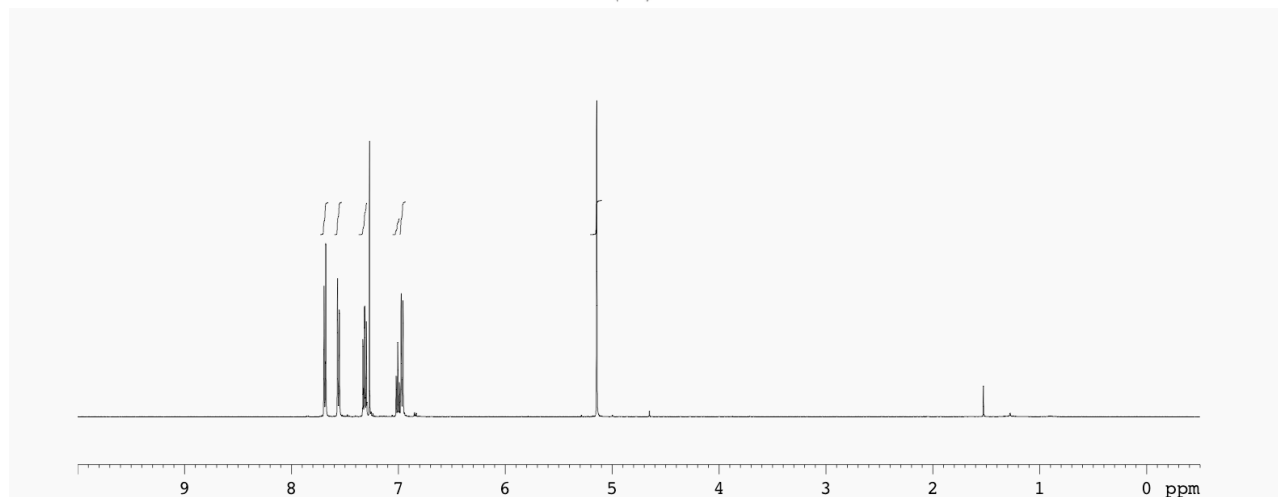

$^1\text{H}$  NMR (500 MHz,  $\text{DMSO-}d_6$ ) Spectrum of Potassium (Phenoxy)methyltrifluoroborate (**2f**)

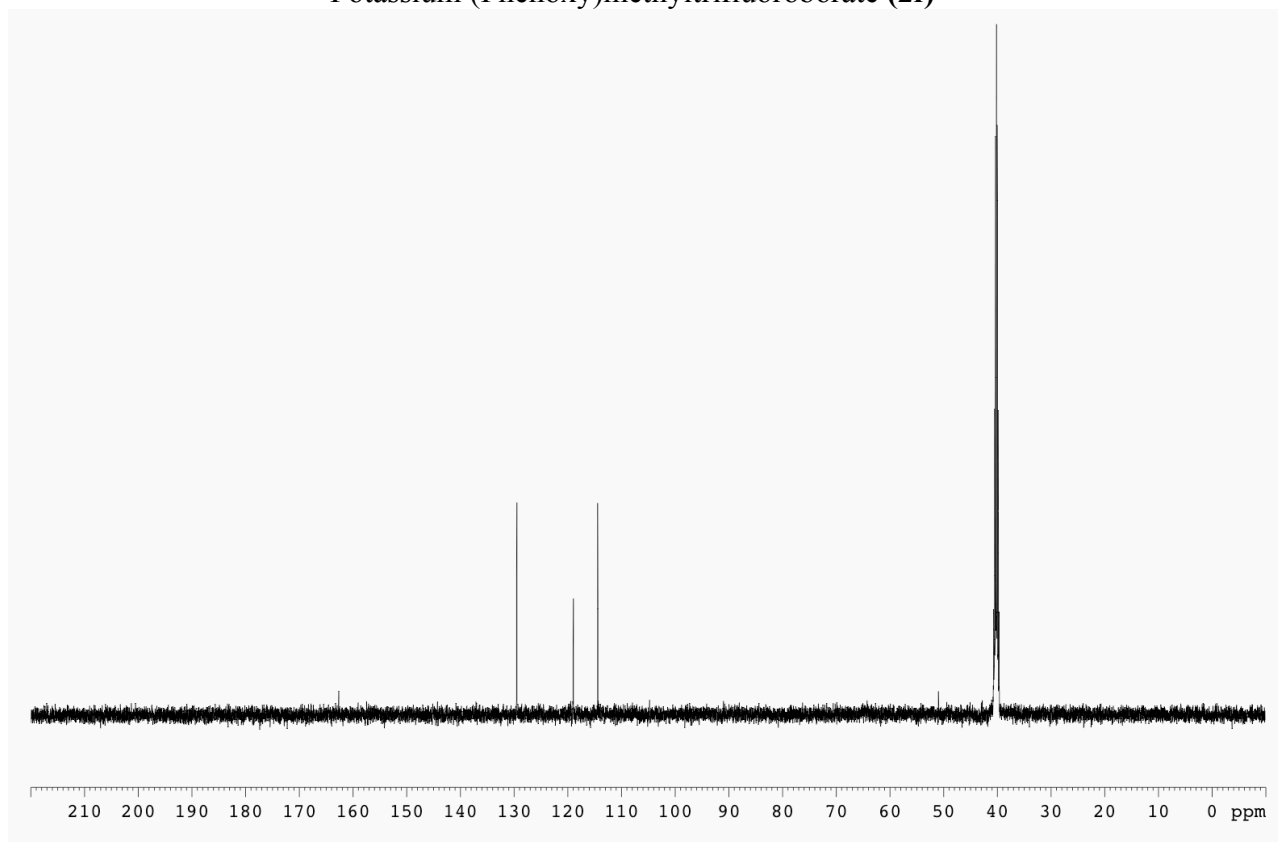

$^{13}\text{C}$  NMR (125.8 MHz,  $\text{DMSO-}d_6$ ) Spectrum of Potassium (Phenoxy)methyltrifluoroborate (**2f**)

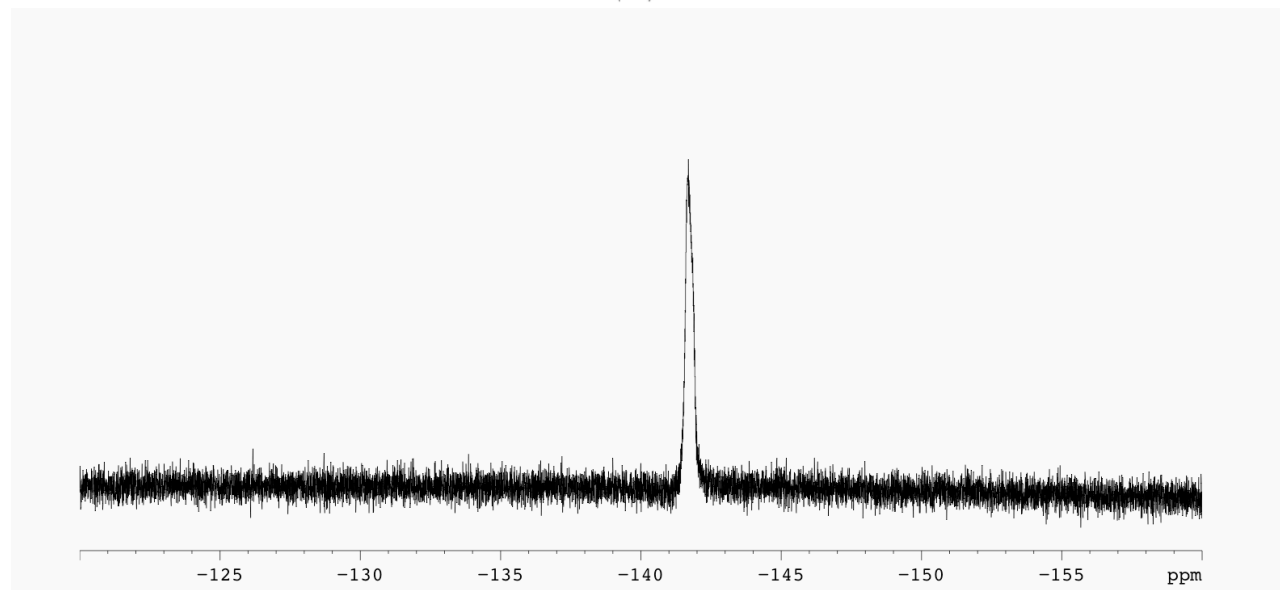

$^{19}\text{F}$  NMR (470.8 MHz,  $\text{DMSO-}d_6$ ) Spectrum of Potassium (Phenoxy)methyltrifluoroborate (**2f**)

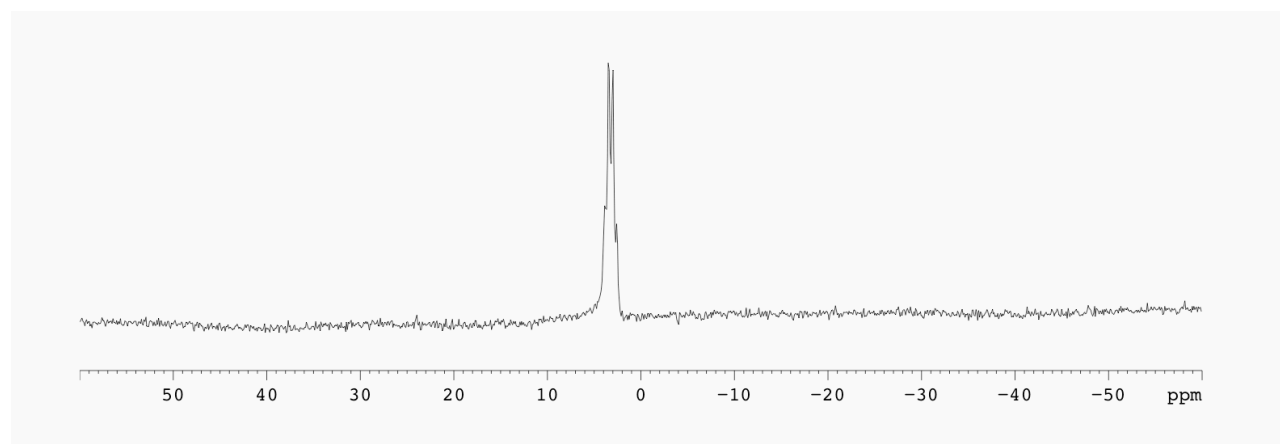

$^{11}\text{B}$  NMR (128.4 MHz, Acetonitrile) Spectrum of Potassium (Phenoxy)methyltrifluoroborate (**2f**)

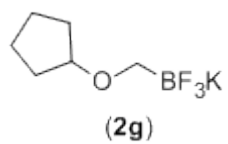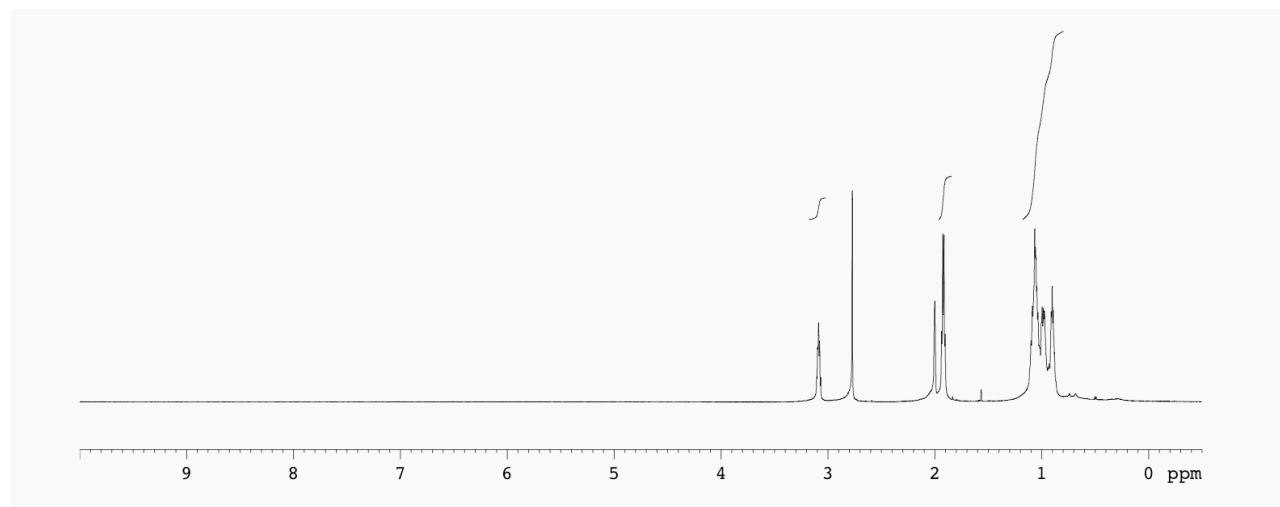

<sup>1</sup>H NMR (500 MHz, DMSO-*d*<sub>6</sub>) Spectrum of Potassium (Cyclopentyloxymethyl)trifluoroborate (**2g**)

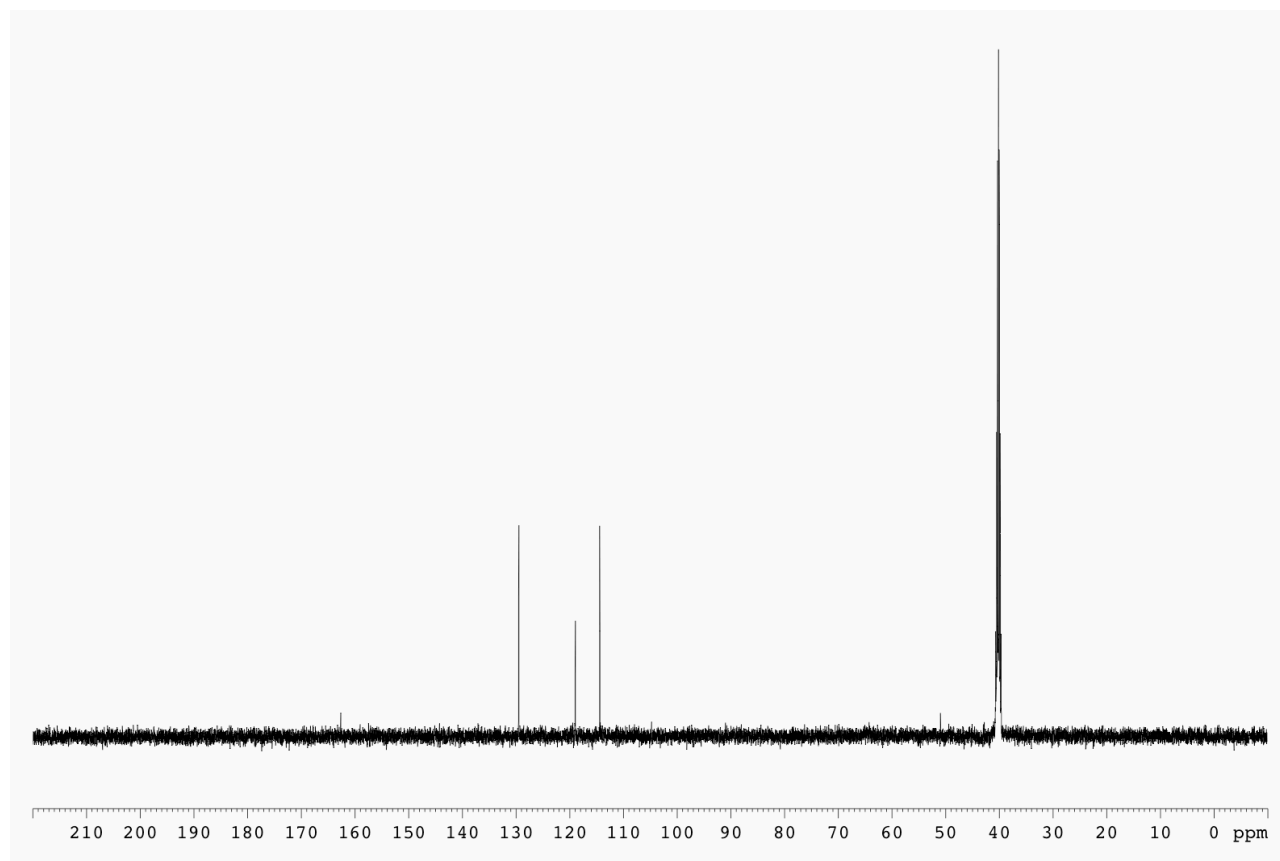

<sup>13</sup>C NMR (125.8 MHz, DMSO-*d*<sub>6</sub>) Spectrum of Potassium (Cyclopentyloxymethyl)trifluoroborate (**2g**)

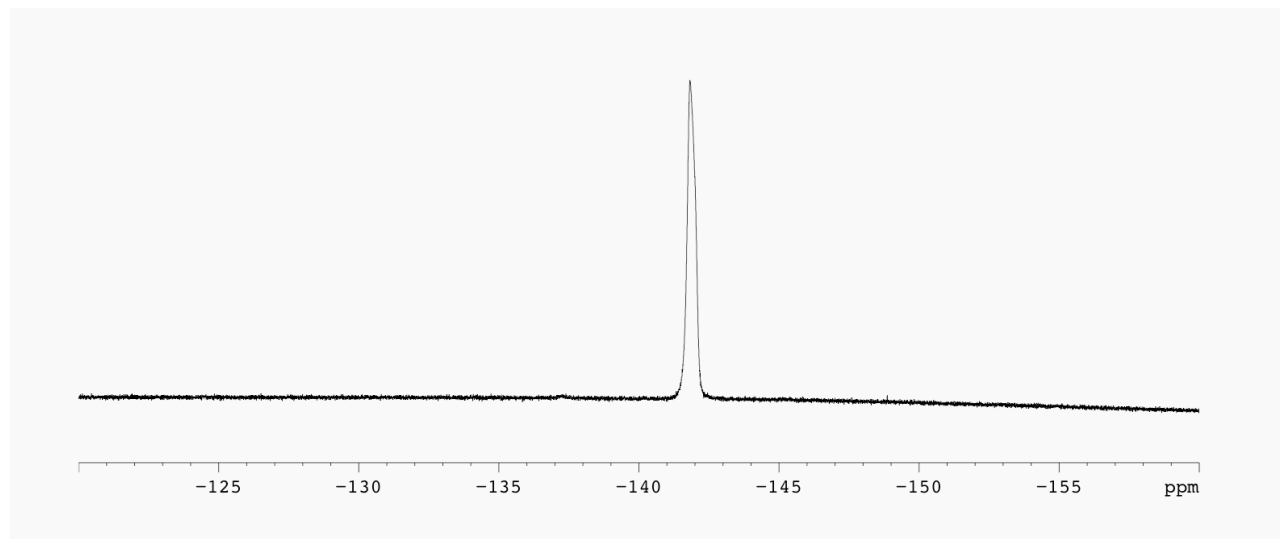

$^{19}\text{F}$  NMR (470.8 MHz,  $\text{DMSO-}d_6$ ) Spectrum of Potassium (Cyclopentyloxymethyl)trifluoroborate (**2g**)

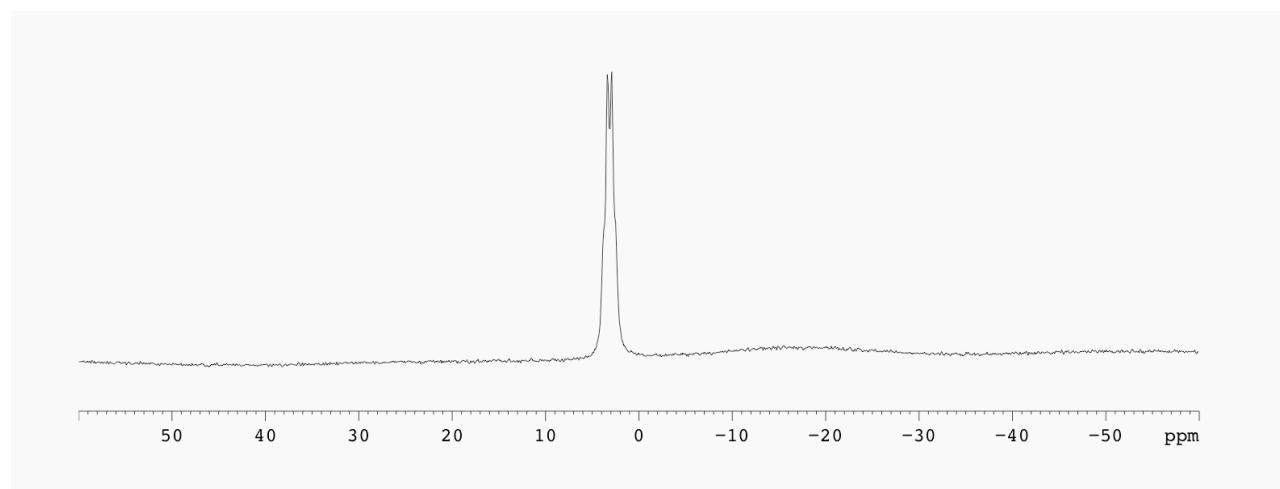

$^{11}\text{B}$  NMR (128.4 MHz,  $\text{DMSO-}d_6$ ) Spectrum of Potassium (Cyclopentyloxymethyl)trifluoroborate (**2g**)

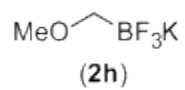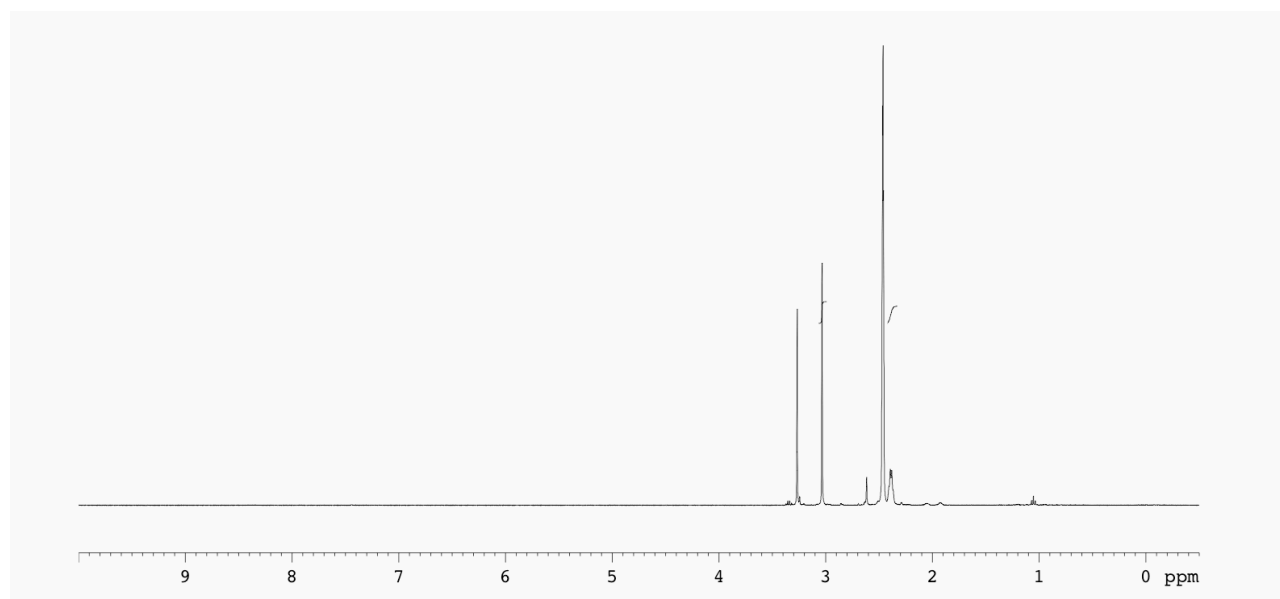

<sup>1</sup>H NMR (500 MHz, DMSO-*d*<sub>6</sub>) Spectrum of Potassium (Methoxymethyl)trifluoroborate (**2h**)

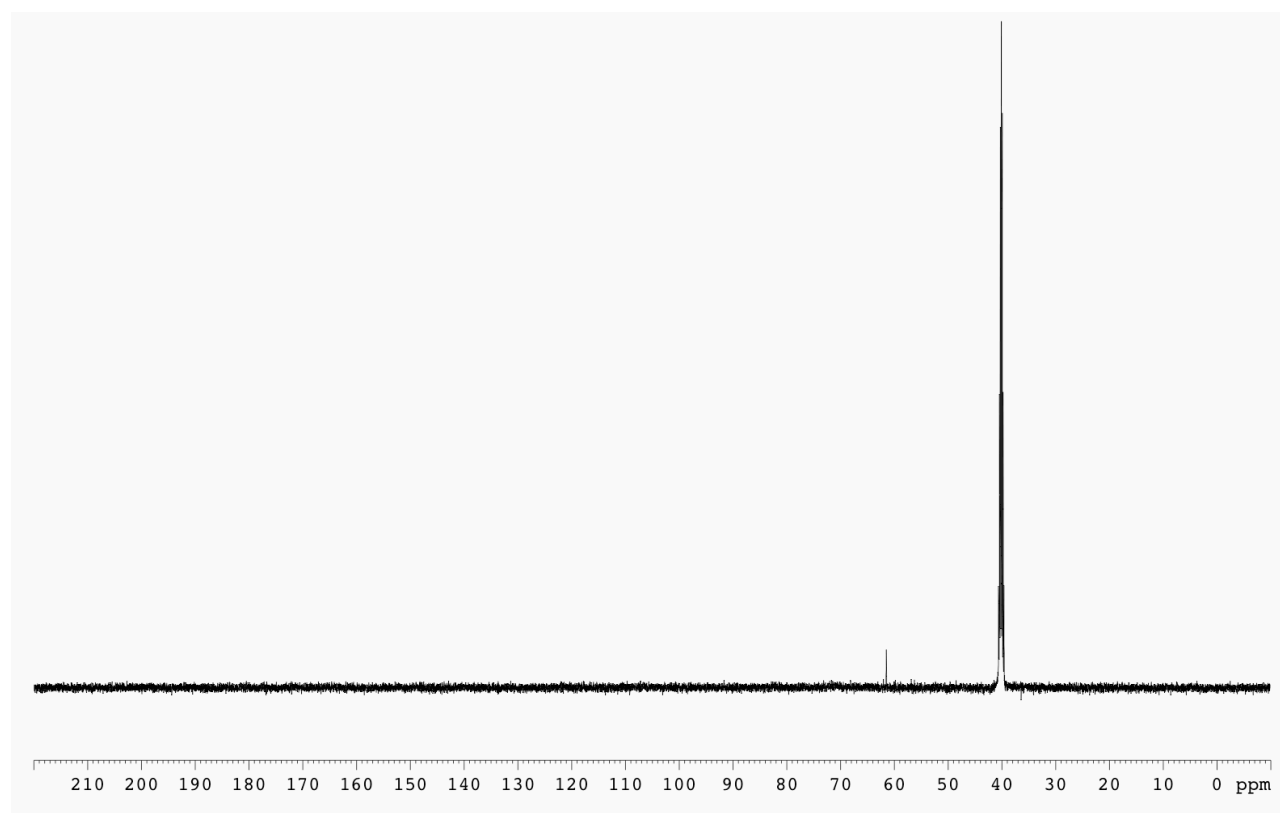

<sup>13</sup>C NMR (125.8 MHz, DMSO-*d*<sub>6</sub>) Spectrum of Potassium (Methoxymethyl)trifluoroborate (**2h**)

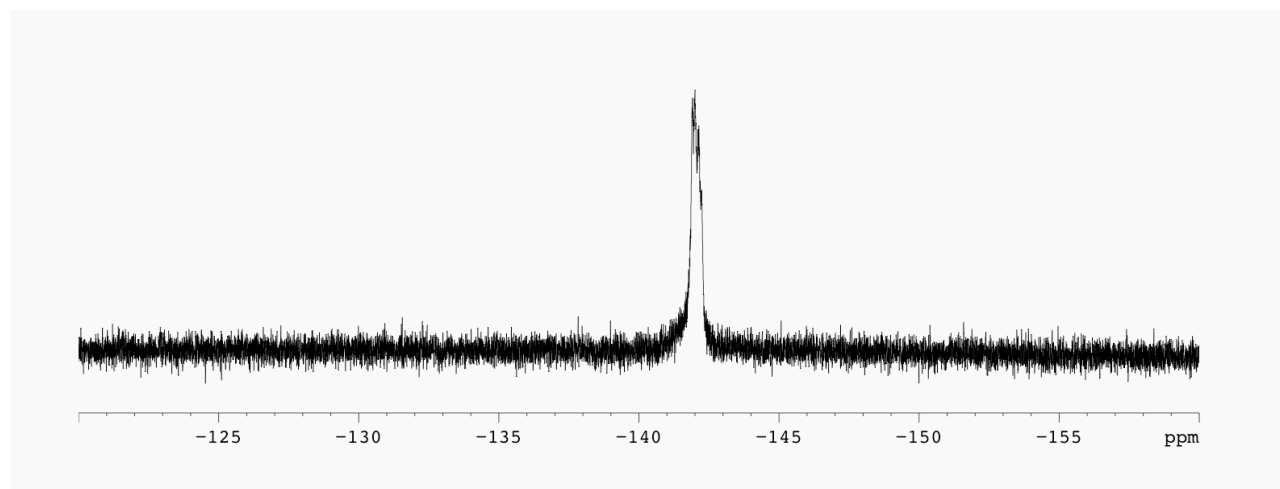

<sup>19</sup>F NMR (470.8 MHz, DMSO-*d*<sub>6</sub>) Spectrum of Potassium (Methoxymethyl)trifluoroborate (**2h**)

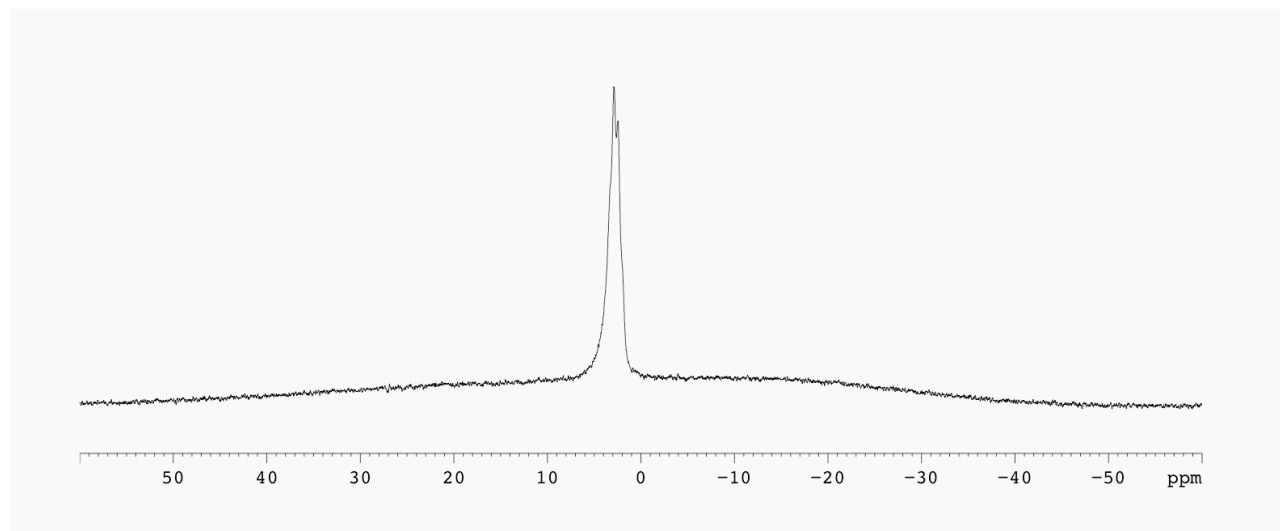

<sup>11</sup>B NMR (128.4 MHz, DMSO-*d*<sub>6</sub>) Spectrum of Potassium (Methoxymethyl)trifluoroborate (**2h**)



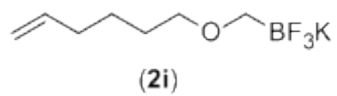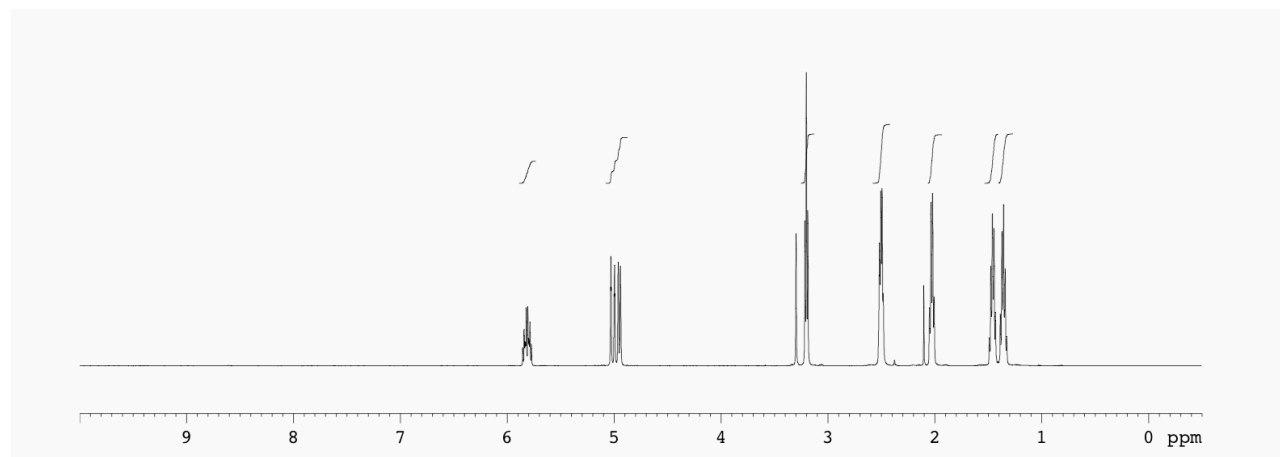

$^{19}\text{F}$  NMR (500 MHz,  $\text{DMSO-}d_6$ ) Spectrum of Potassium (Hex-5-enyloxy)methyltrifluoroborate (**2i**)

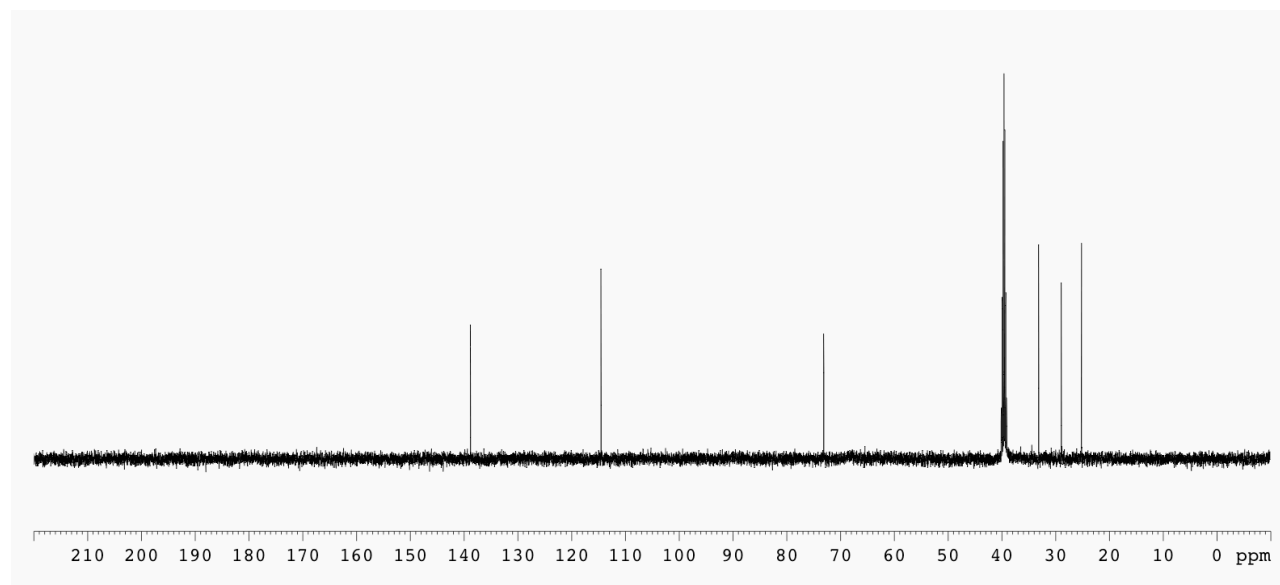

$^{13}\text{C}$  NMR (125.8 MHz,  $\text{DMSO-}d_6$ ) Spectrum of Potassium (Hex-5-enyloxy)methyltrifluoroborate (**2i**)

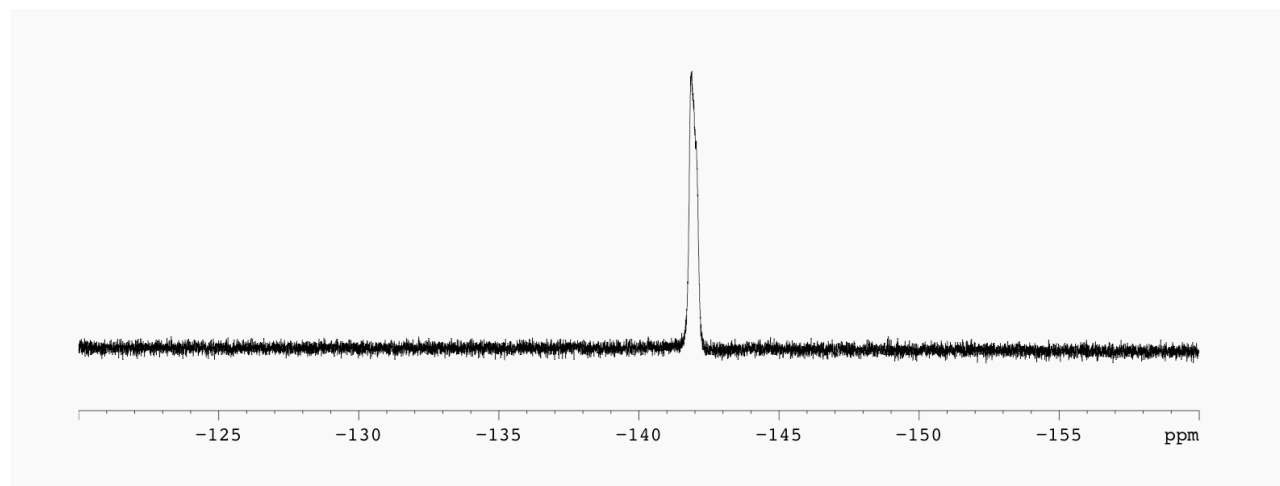

$^{19}\text{F}$  NMR (470.8 MHz,  $\text{DMSO-}d_6$ ) Spectrum of Potassium (Hex-5-enyloxy)methyltrifluoroborate (**2i**)

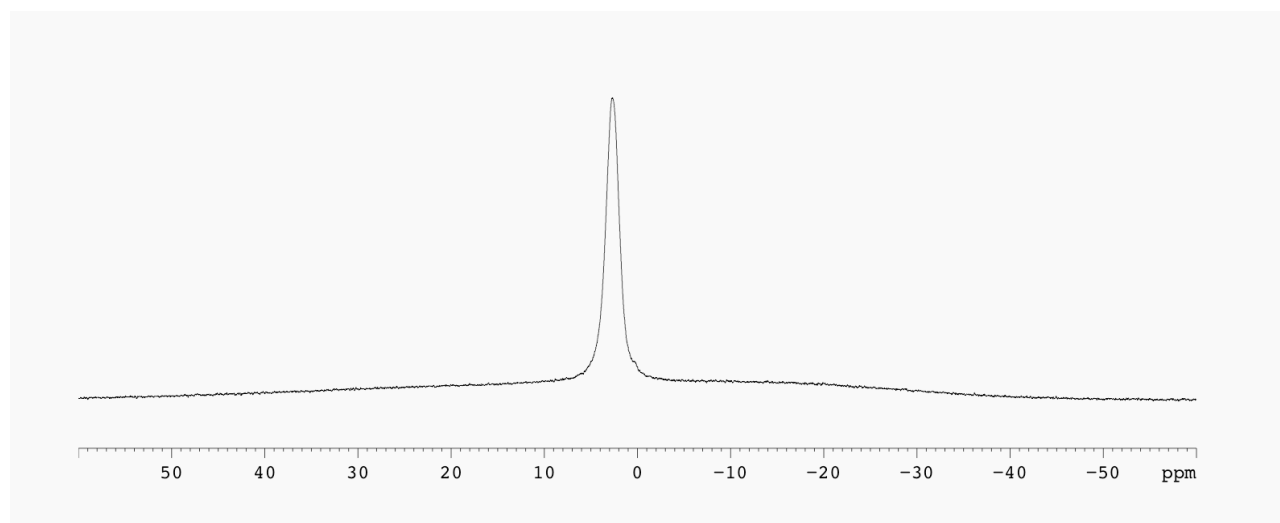

$^{11}\text{B}$  NMR (128.4 MHz,  $\text{DMSO-}d_6$ ) Spectrum of Potassium (Hex-5-enyloxy)methyltrifluoroborate (**2i**)

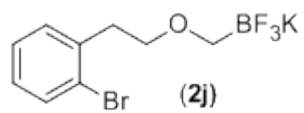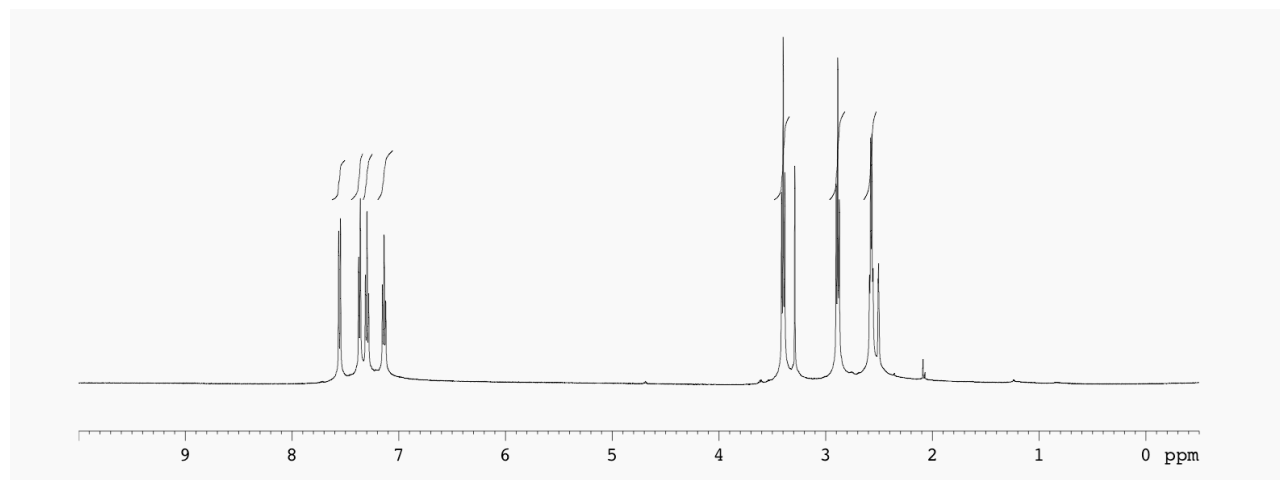

$^1\text{H}$  NMR (500 MHz,  $\text{DMSO-}d_6$ ) Spectrum of Potassium (2-Bromophenoxy)methyltrifluoroborate (2j)

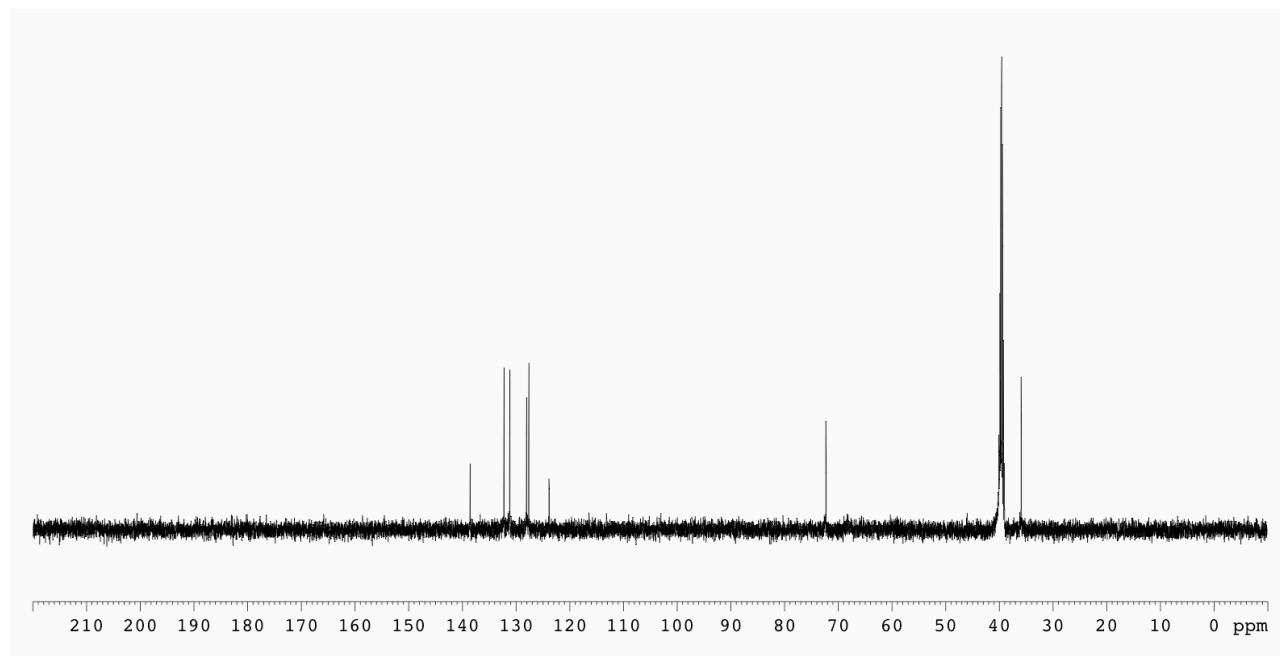

$^{13}\text{C}$  NMR (125.8 MHz,  $\text{DMSO-}d_6$ ) Spectrum of Potassium (2-Bromophenoxy)methyltrifluoroborate (2j)

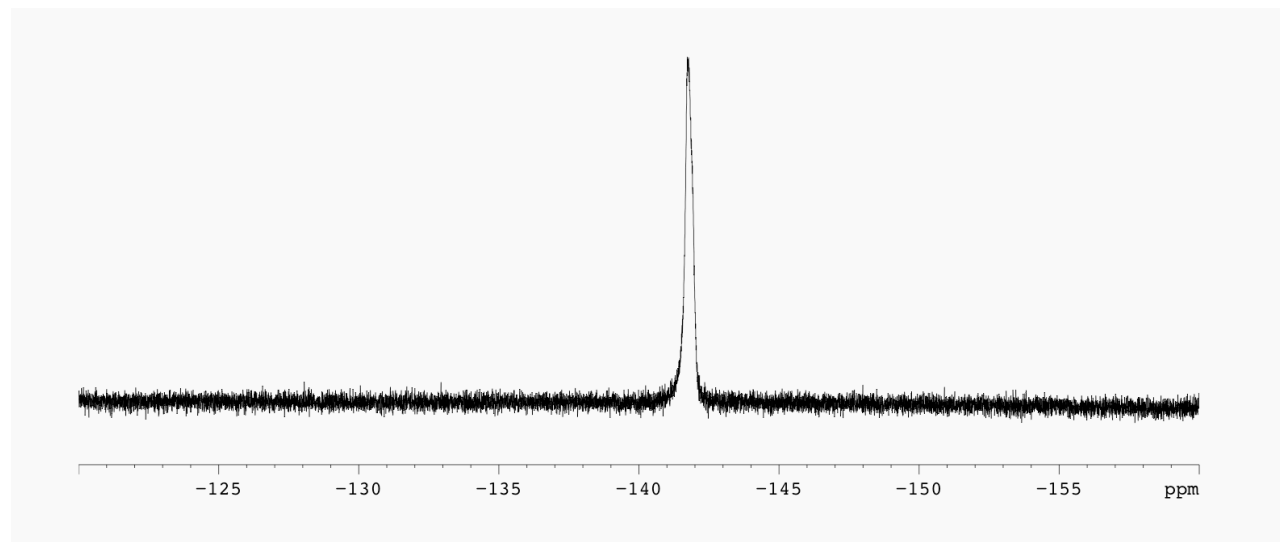

$^{19}\text{F}$  NMR (470.8 MHz,  $\text{DMSO-}d_6$ ) Spectrum of Potassium (2-Bromophenoxy)methyltrifluoroborate (2j)

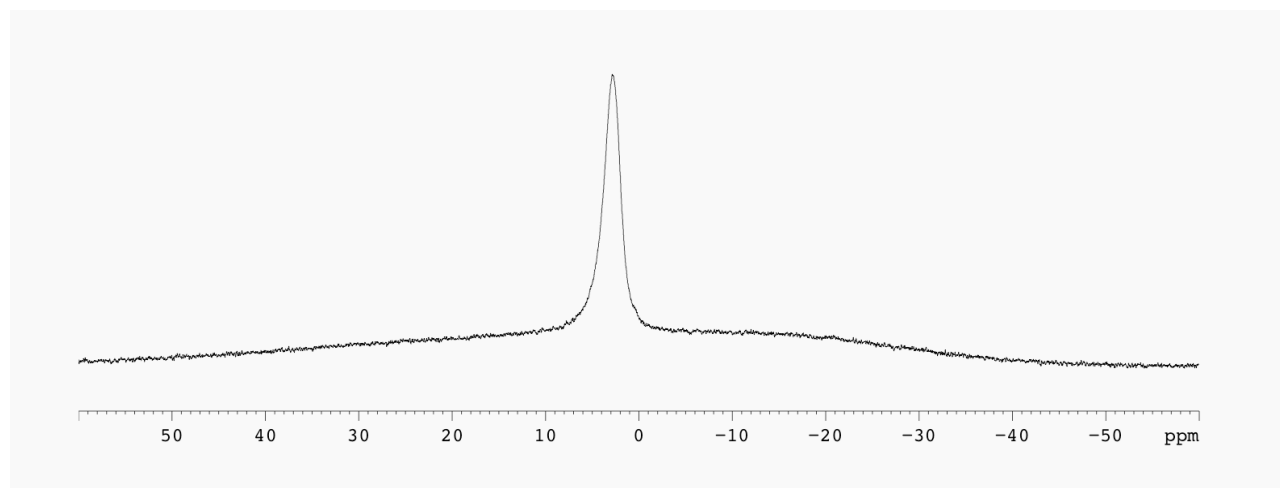

$^{11}\text{B}$  NMR (128.4 MHz,  $\text{DMSO-}d_6$ ) Spectrum of Potassium (2-Bromophenoxy)methyltrifluoroborate (2j)

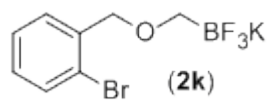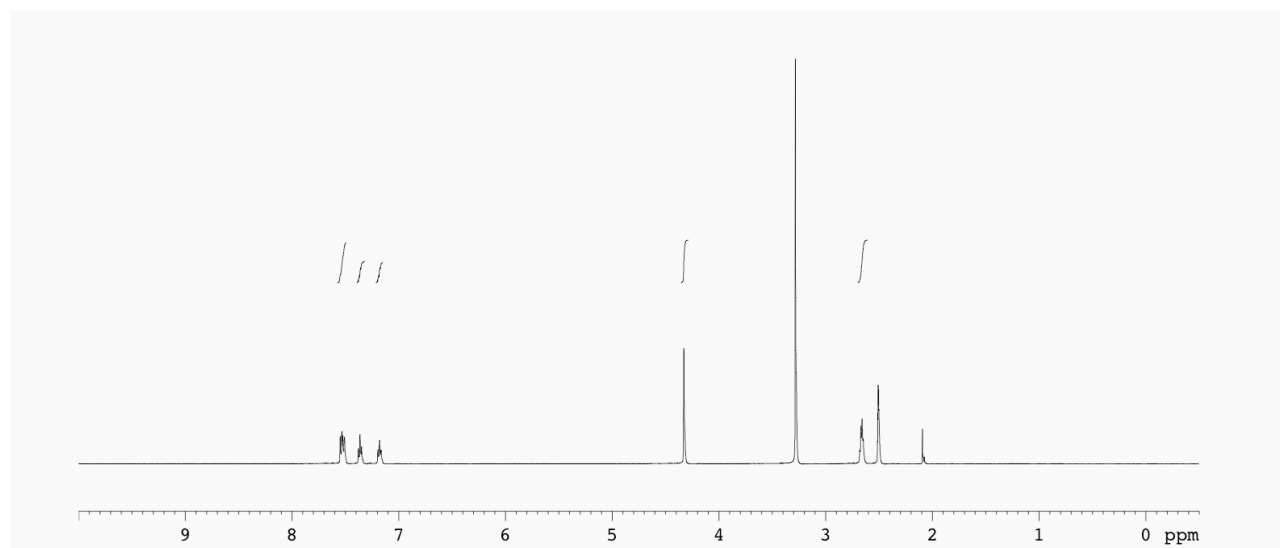

<sup>1</sup>H NMR (500 MHz, DMSO-*d*<sub>6</sub>) Spectrum of Potassium (2-Bromobenzoyloxy)methyltrifluoroborate (2k)

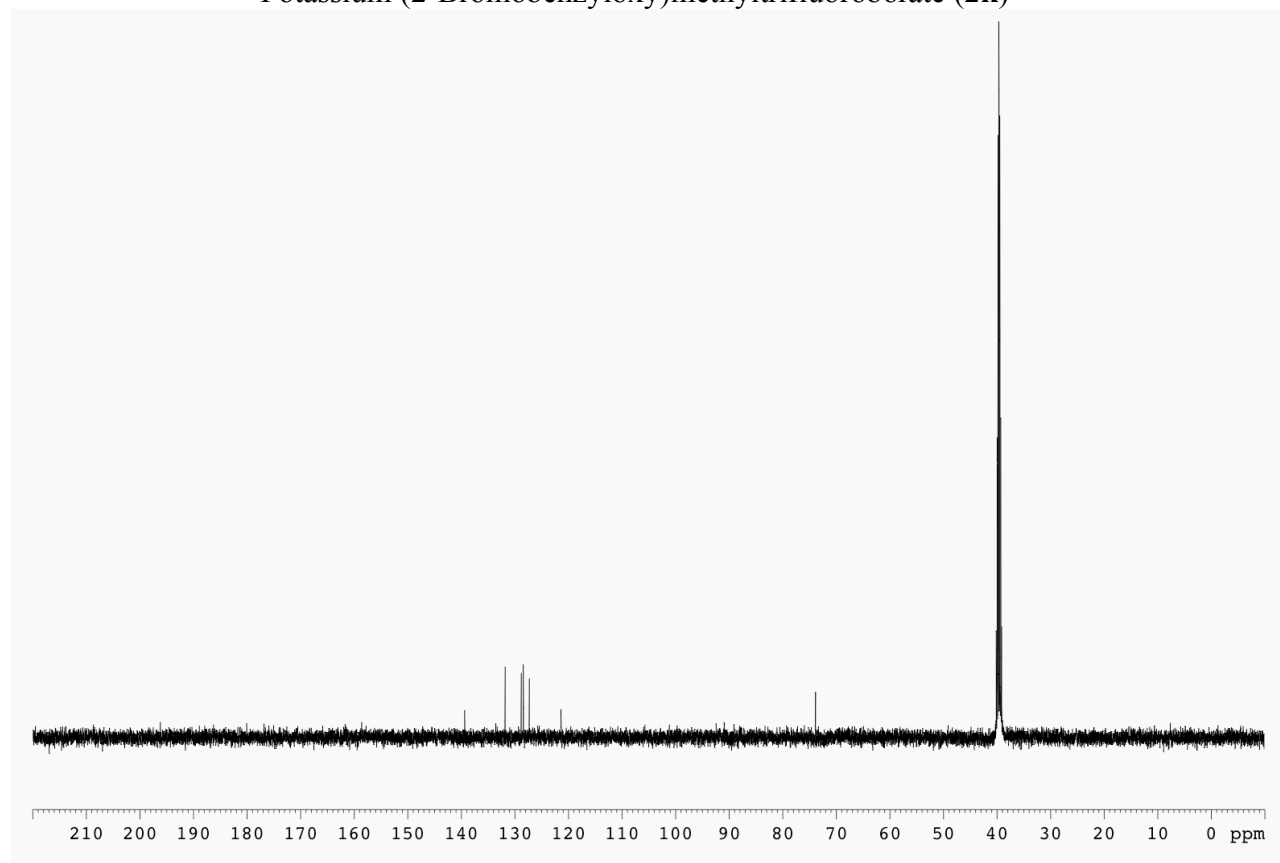

<sup>13</sup>C NMR (125.8 MHz, DMSO-*d*<sub>6</sub>) Spectrum of Potassium (2-Bromobenzoyloxy)methyltrifluoroborate (2k)

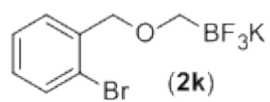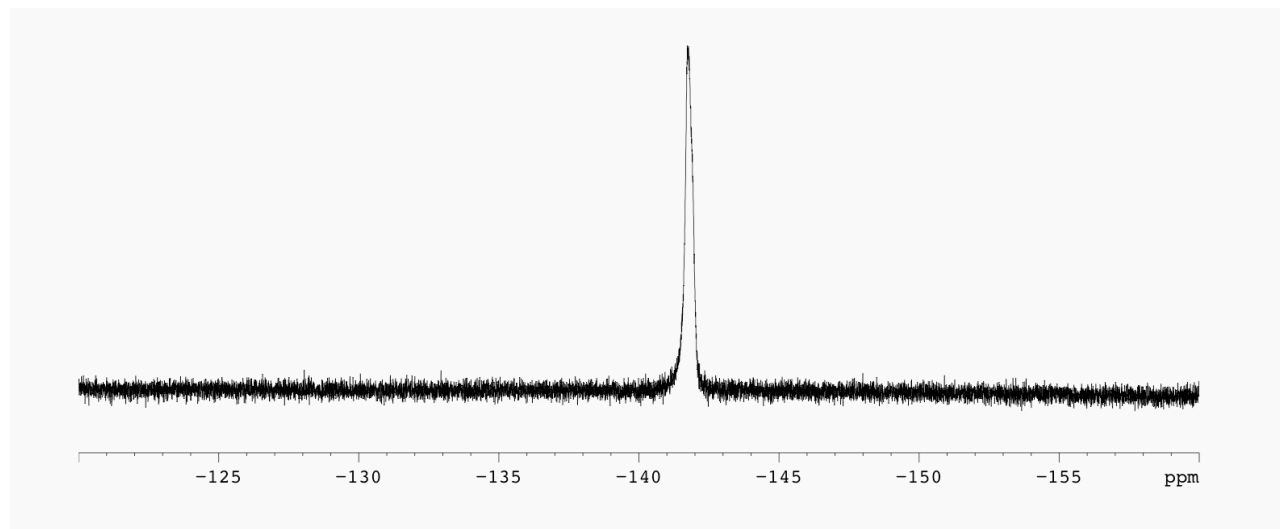

$^{19}\text{F}$  NMR (470.8 MHz,  $\text{DMSO-}d_6$ ) Spectrum of Potassium (2-Bromobenzyloxy)methyltrifluoroborate (2k)

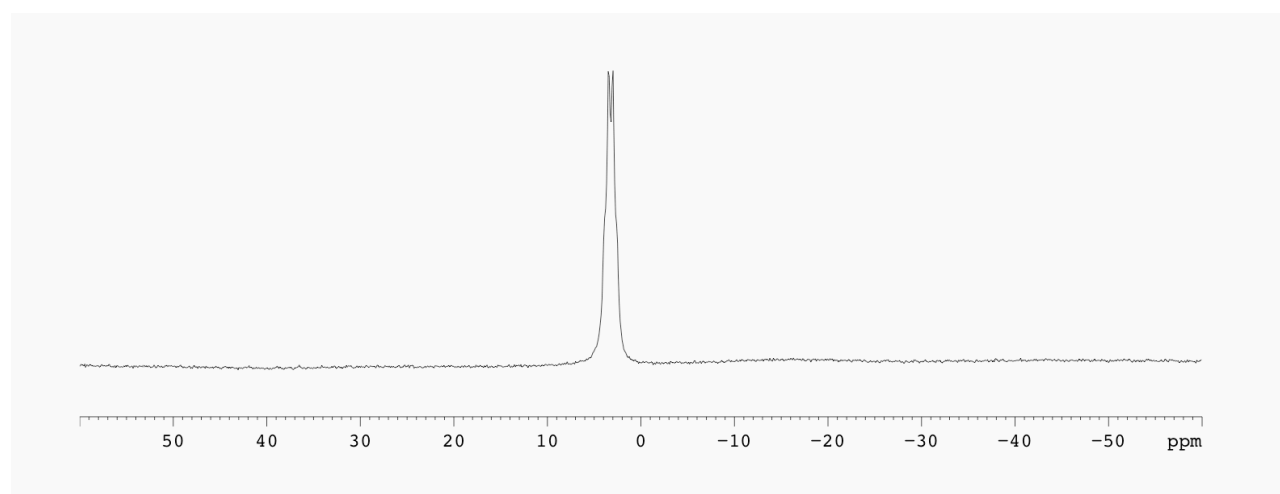

$^{11}\text{B}$  NMR (128.4 MHz,  $\text{DMSO-}d_6$ ) Spectrum of Potassium (2-Bromobenzyloxy)methyltrifluoroborate (2k)

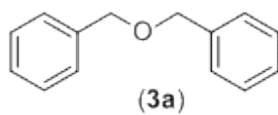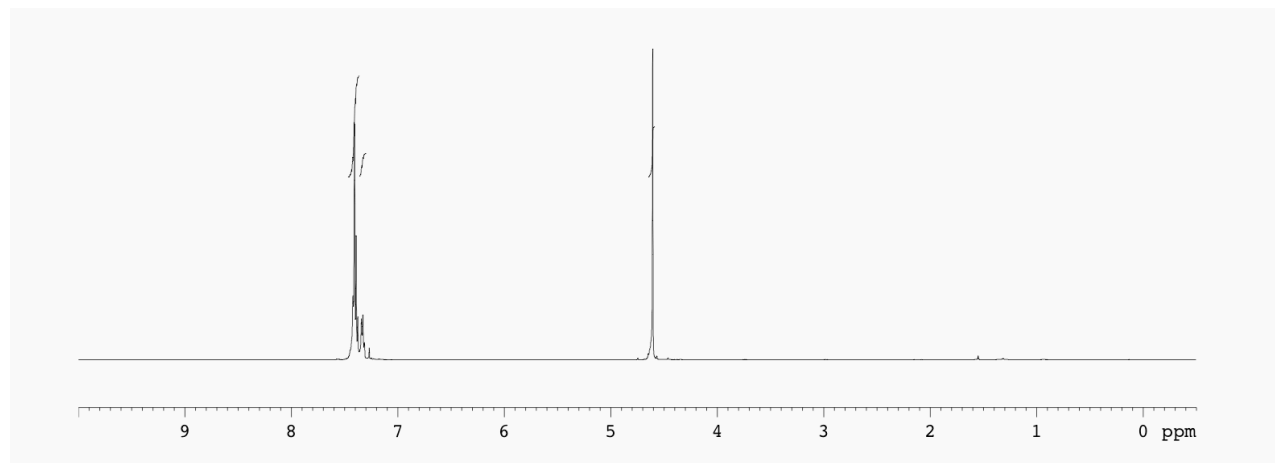

<sup>1</sup>H NMR (500 MHz, CDCl<sub>3</sub>) Spectrum of  
Oxybis(methylene)dibenzene (**3a**)

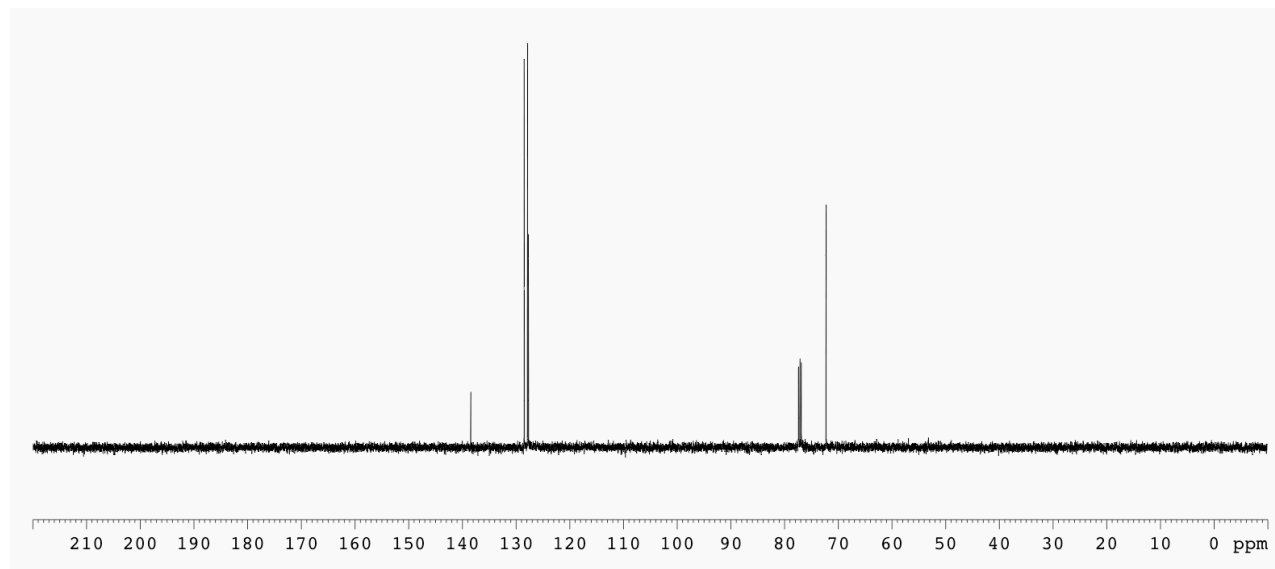

<sup>13</sup>C NMR (125.8 MHz, CDCl<sub>3</sub>) Spectrum of  
Oxybis(methylene)dibenzene (**3a**)

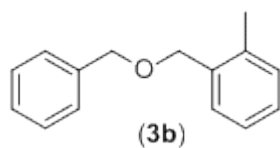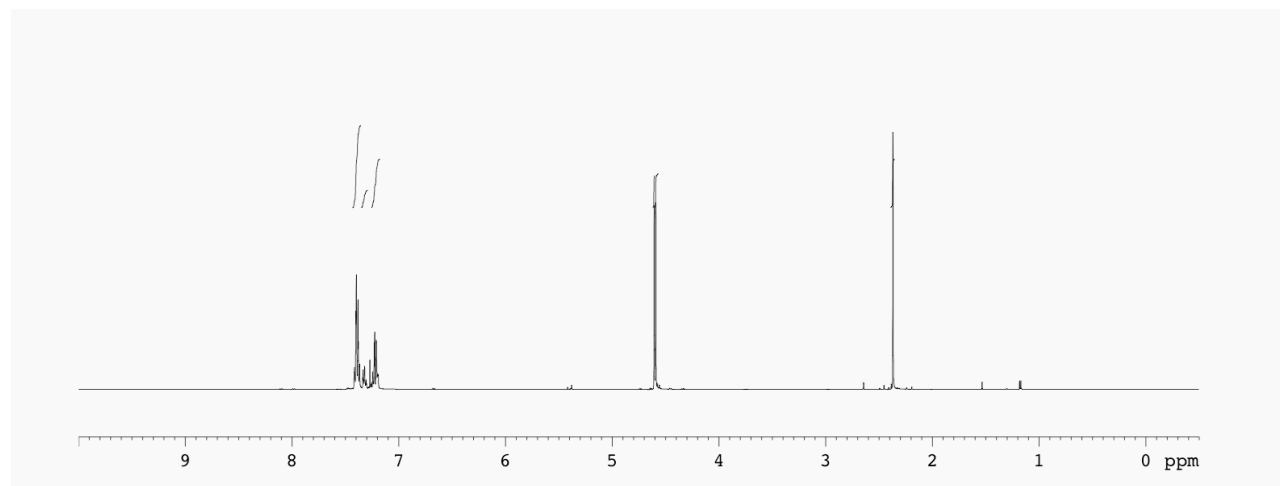

<sup>1</sup>H NMR (500 MHz, CDCl<sub>3</sub>) Spectrum of 1-(Benzyloxymethyl)-2-methylbenzene (**3b**)

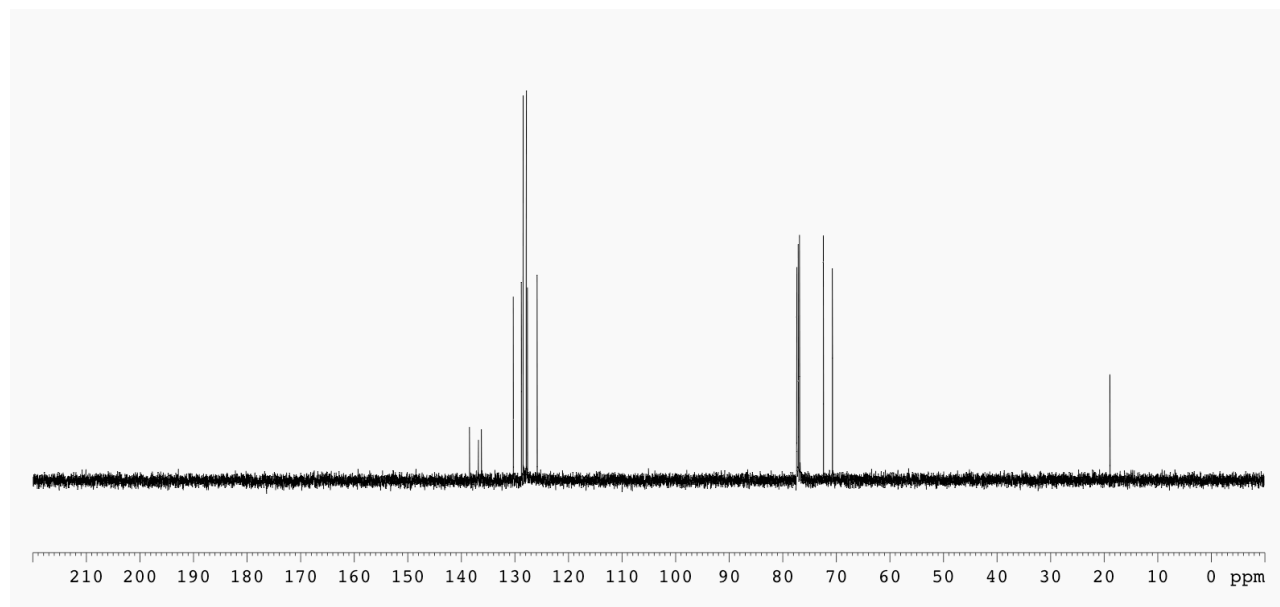

<sup>13</sup>C NMR (125.8 MHz, CDCl<sub>3</sub>) Spectrum of 1-(Benzyloxymethyl)-2-methylbenzene (**3b**)



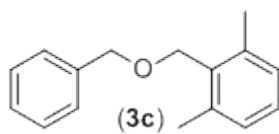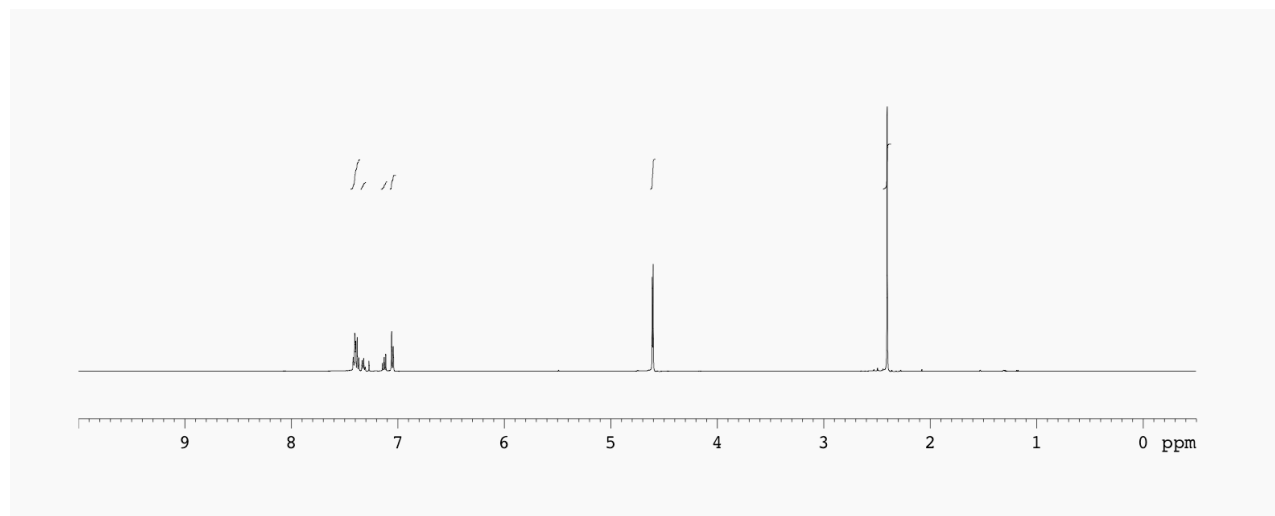

$^1\text{H}$  NMR (500 MHz,  $\text{CDCl}_3$ ) Spectrum of  
2-(Benzyloxymethyl)-1,3-dimethylbenzene (**3c**)

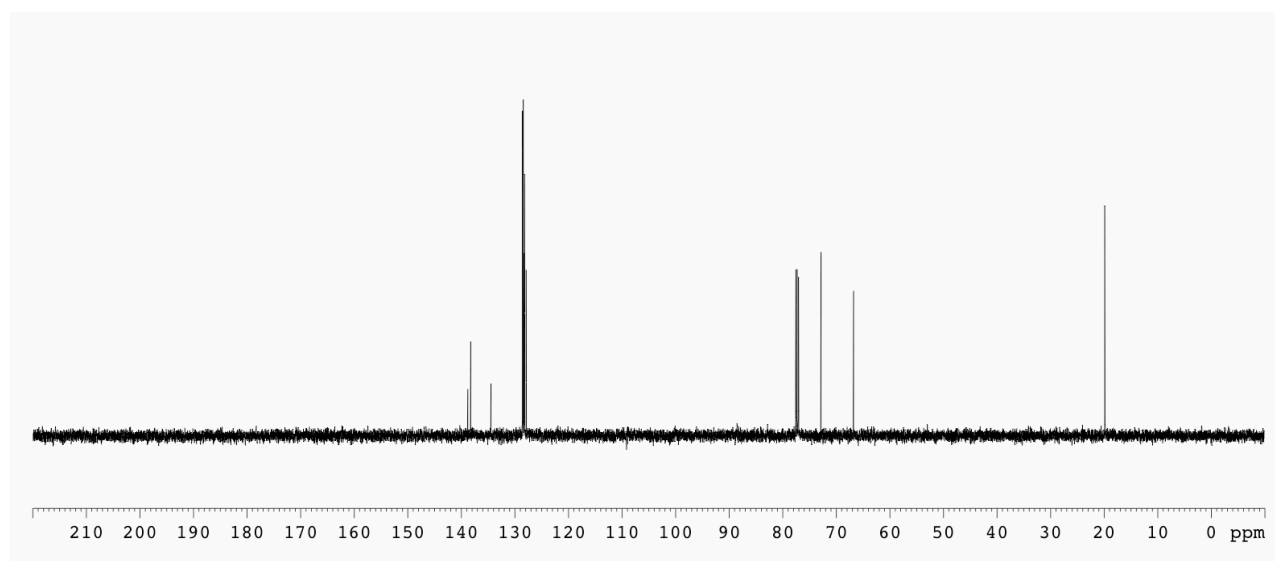

$^{13}\text{C}$  NMR (125.8 MHz,  $\text{CDCl}_3$ ) Spectrum of  
2-(Benzyloxymethyl)-1,3-dimethylbenzene (**3c**)

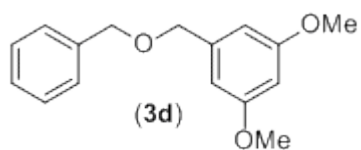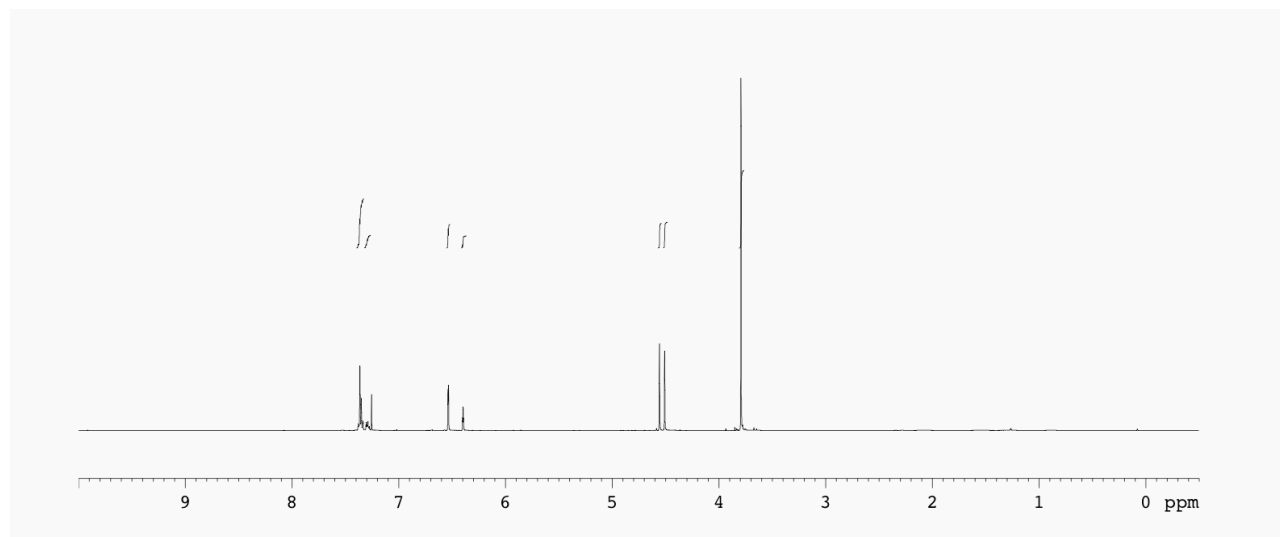

<sup>1</sup>H NMR (500 MHz, CDCl<sub>3</sub>) Spectrum of  
1-(Benzyloxymethyl)-3,5-dimethoxybenzene (**3d**)

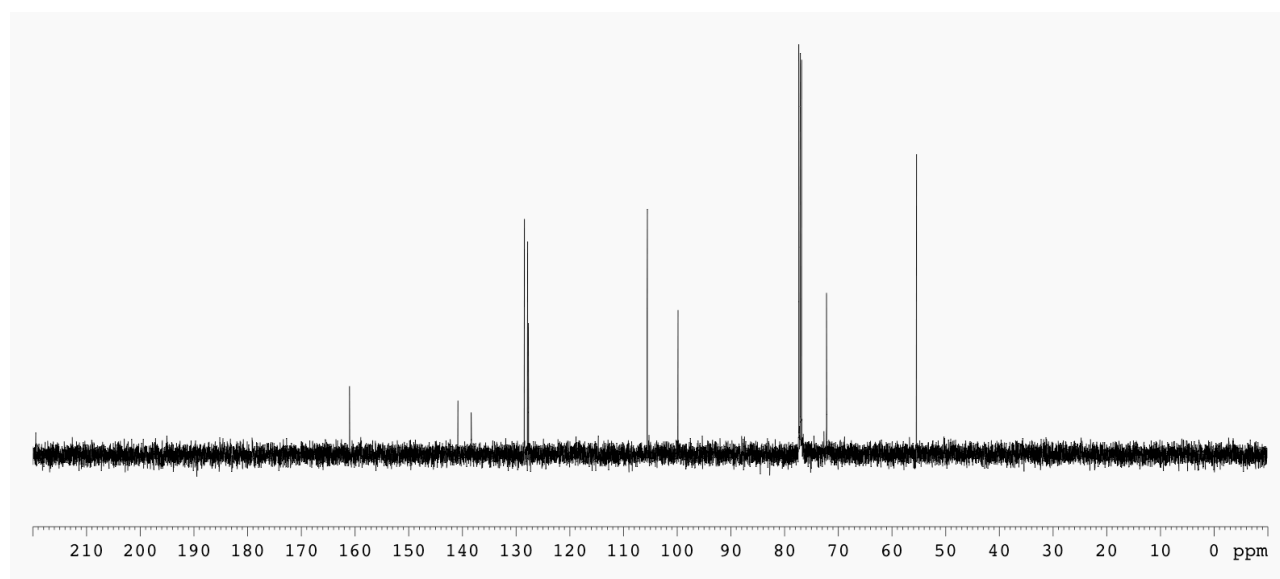

<sup>13</sup>C NMR (125.8 MHz, CDCl<sub>3</sub>) Spectrum of  
1-(Benzyloxymethyl)-3,5-dimethoxybenzene (**3d**)

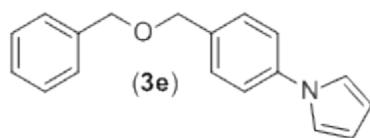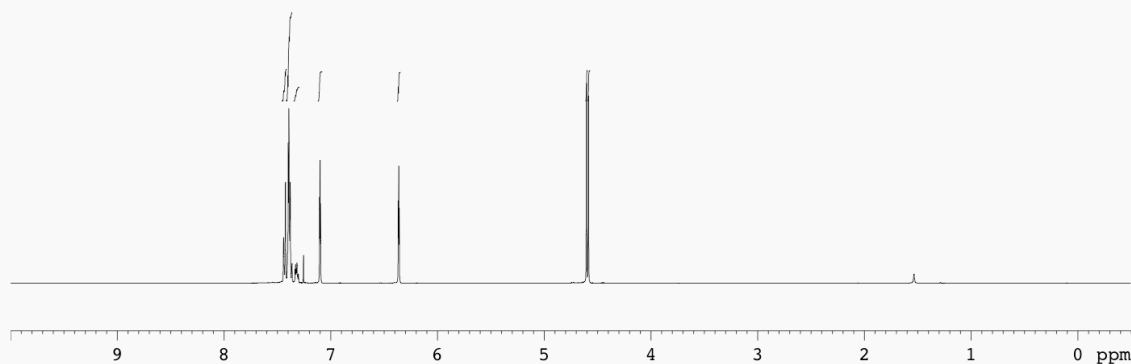

$^1\text{H}$  NMR (500 MHz,  $\text{CDCl}_3$ ) Spectrum of  
1-(4-(Benzyloxymethyl)phenyl)-1*H*-pyrrole (**3e**)

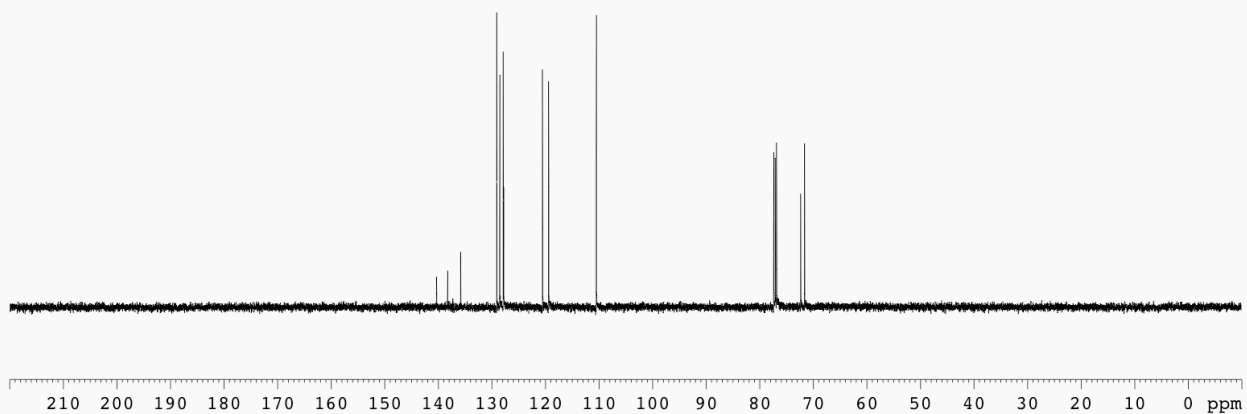

$^{13}\text{C}$  NMR (125.8 MHz,  $\text{CDCl}_3$ ) Spectrum of  
1-(4-(Benzyloxymethyl)phenyl)-1*H*-pyrrole (**3e**)

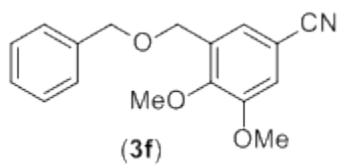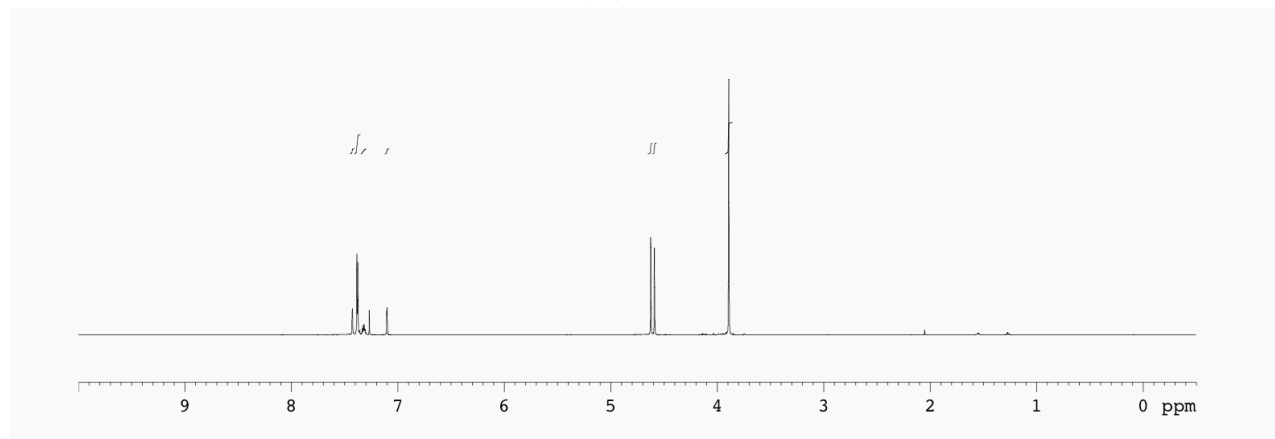

<sup>1</sup>H NMR (500 MHz, CDCl<sub>3</sub>) Spectrum of  
3-(Benzyloxymethyl)-4,5-dimethoxybenzonitrile (3f)

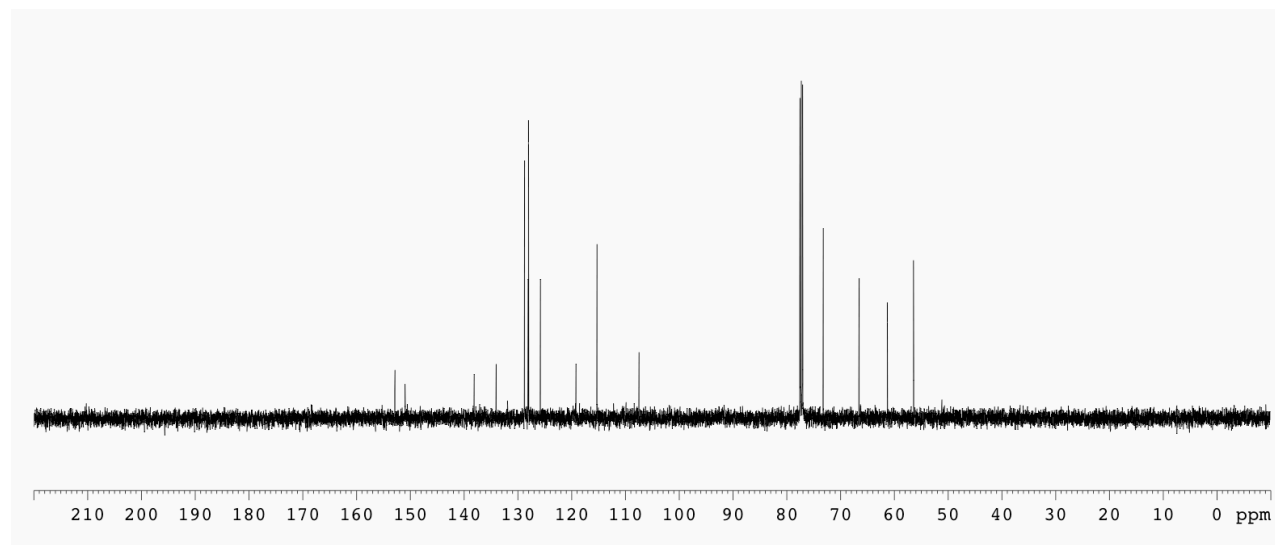

<sup>13</sup>C NMR (125.8 MHz, CDCl<sub>3</sub>) Spectrum of  
3-(Benzyloxymethyl)-4,5-dimethoxybenzonitrile (3f)

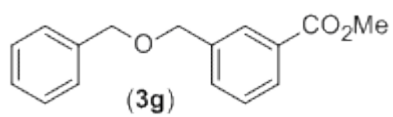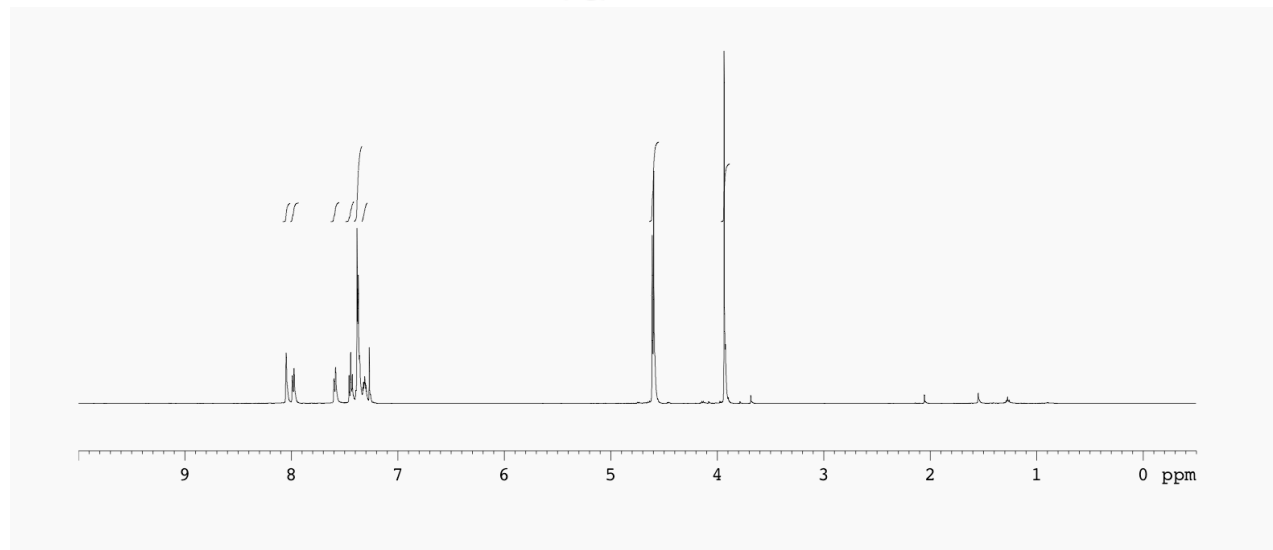

<sup>1</sup>H NMR (500 MHz, CDCl<sub>3</sub>) Spectrum of Methyl 3-(benzyloxymethyl)benzoate (**3g**)

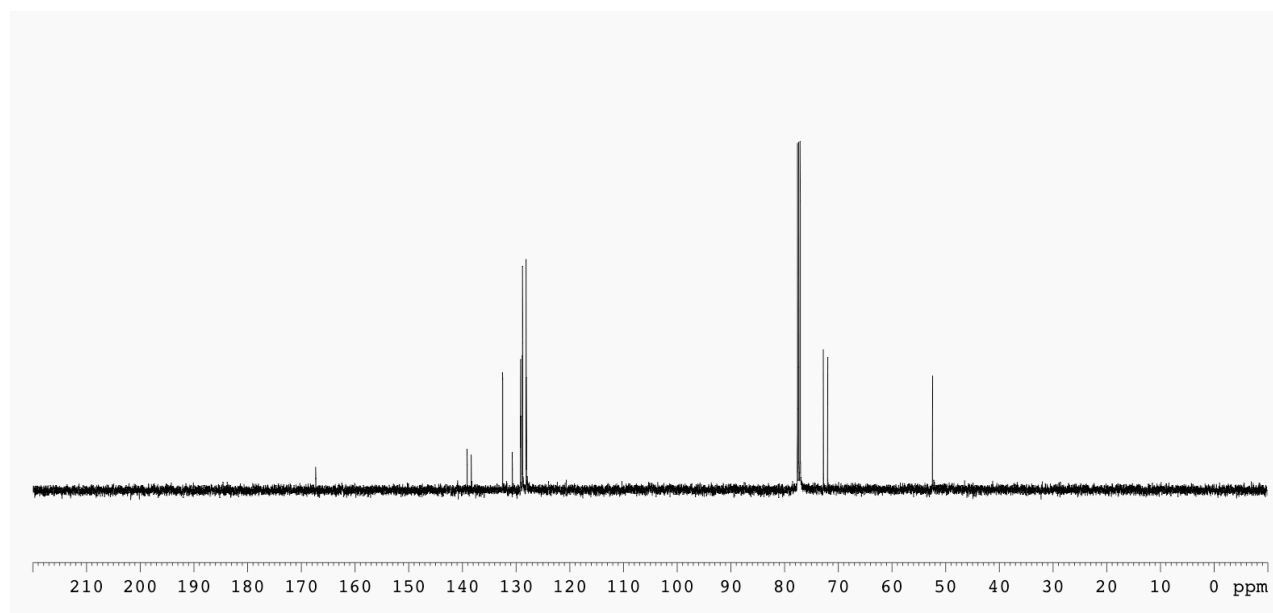

<sup>13</sup>C NMR (125.8 MHz, CDCl<sub>3</sub>) Spectrum of Methyl 3-(benzyloxymethyl)benzoate (**3g**)

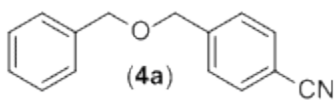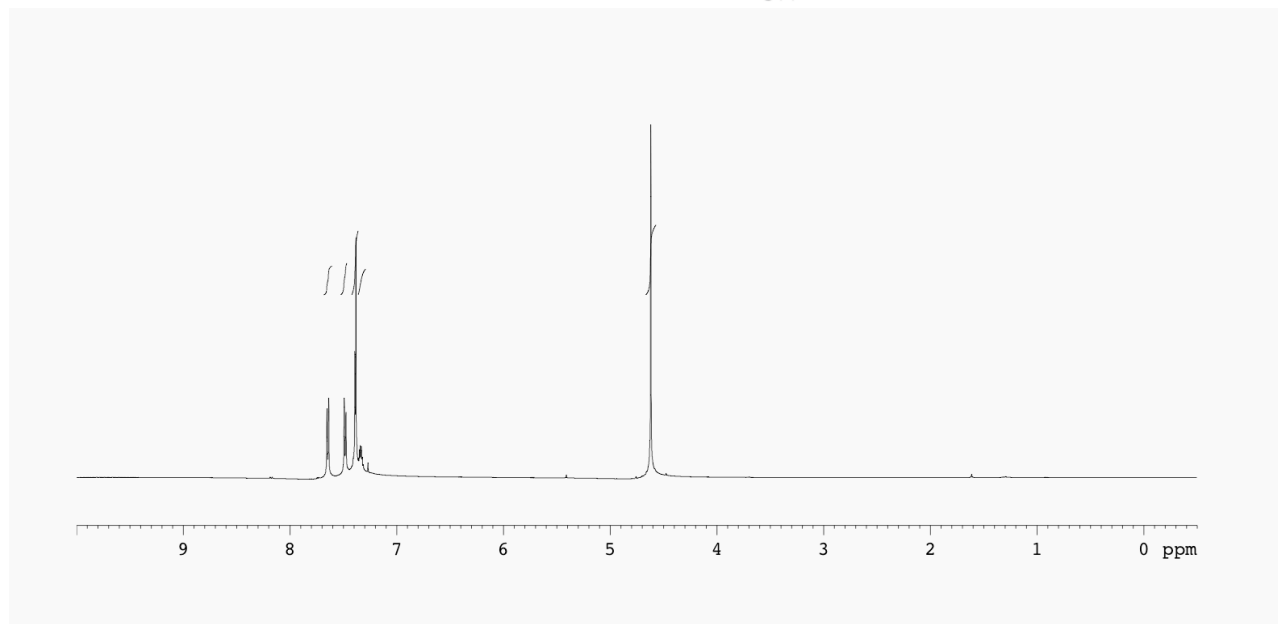

$^1\text{H}$  NMR (500 MHz,  $\text{CDCl}_3$ ) Spectrum of 4-((4-Methoxybenzyloxy)methyl)benzonitrile (**4a**)

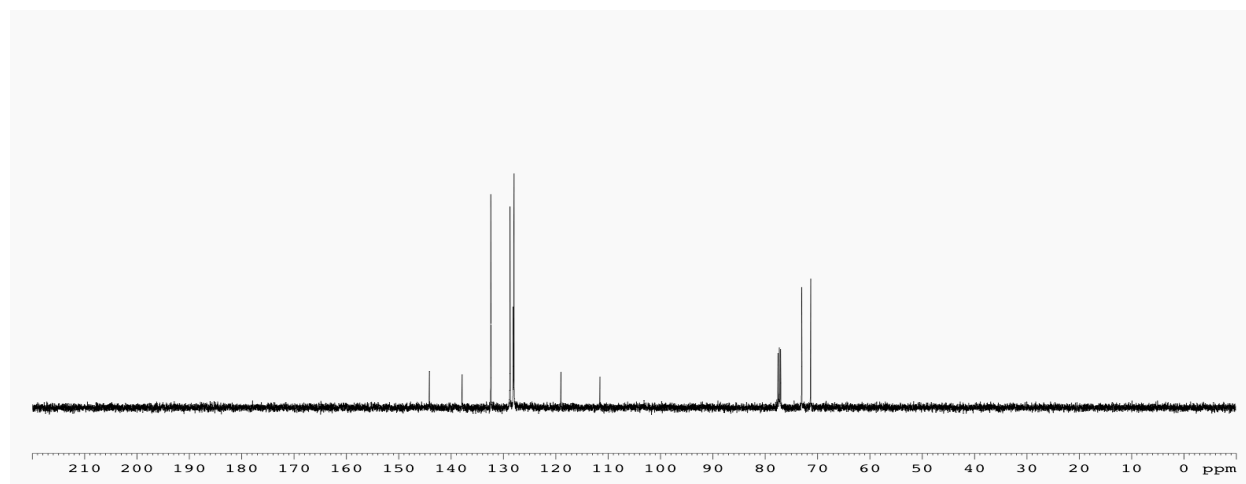

$^{13}\text{C}$  NMR (125.8 MHz,  $\text{CDCl}_3$ ) Spectrum of 4-((4-Methoxybenzyloxy)methyl)benzonitrile (**4a**)

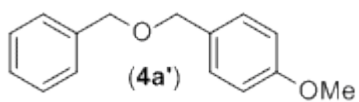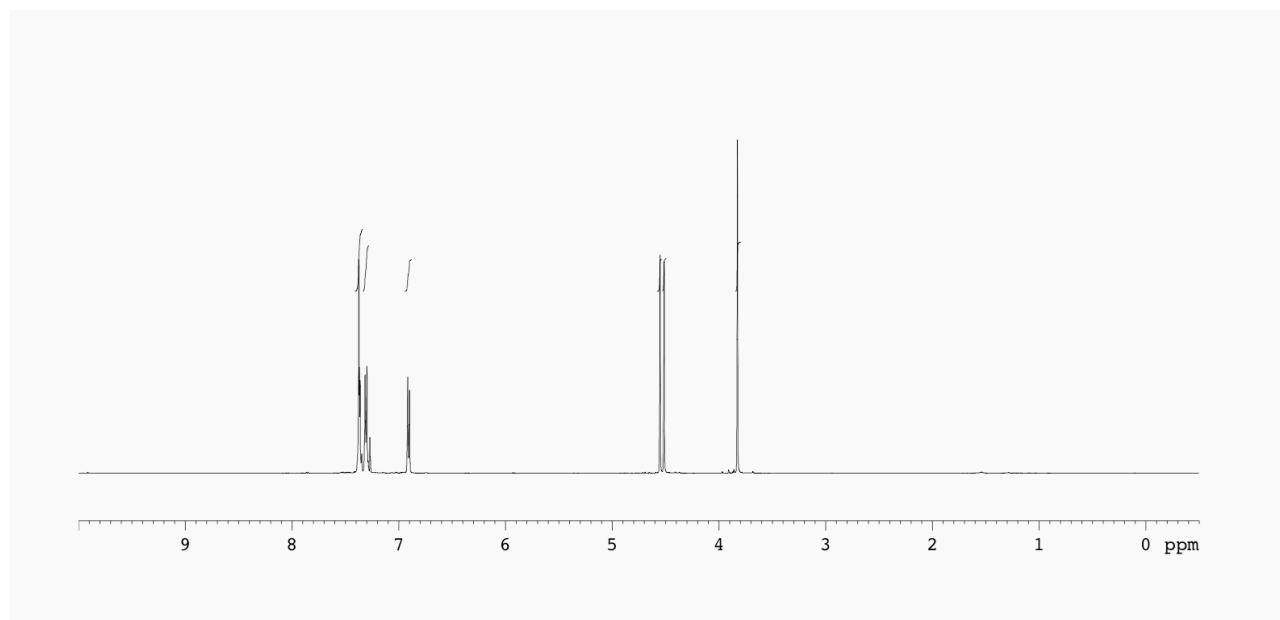

<sup>1</sup>H NMR (500 MHz, CDCl<sub>3</sub>) Spectrum of 4-((4-Methoxybenzyloxy)methyl)benzonitrile (**4a'**)

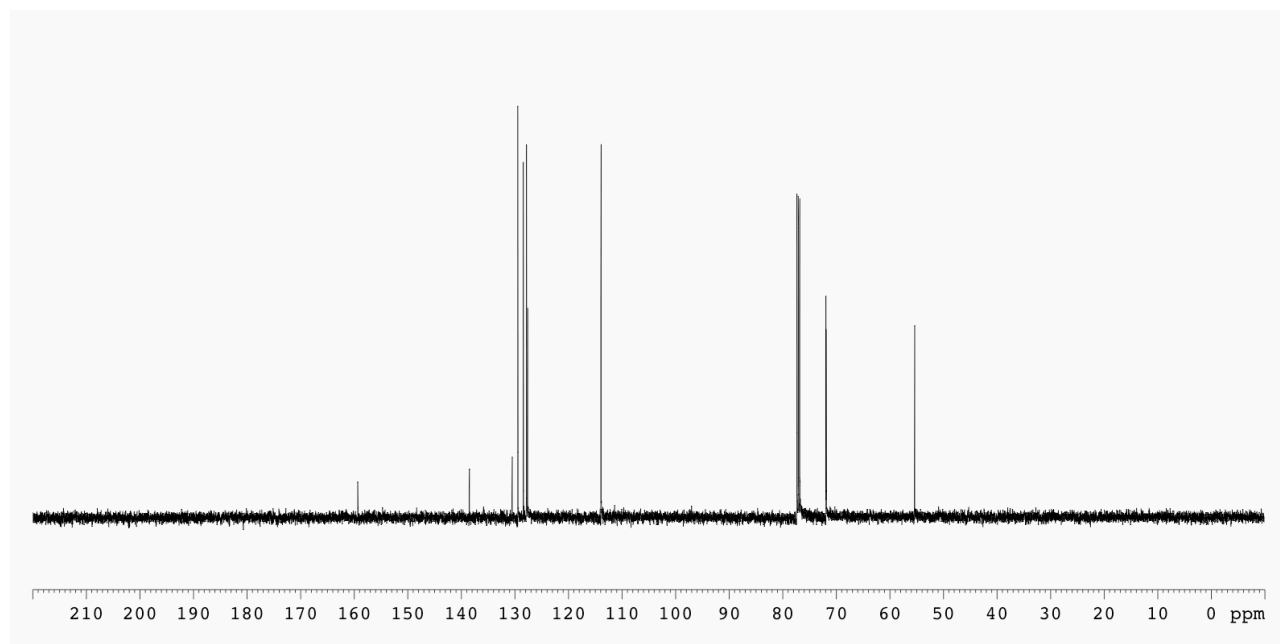

<sup>13</sup>C NMR (125.8 MHz, CDCl<sub>3</sub>) Spectrum of 4-((4-Methoxybenzyloxy)methyl)benzonitrile (**4a'**)

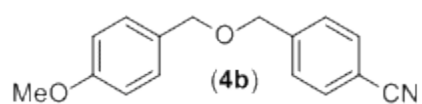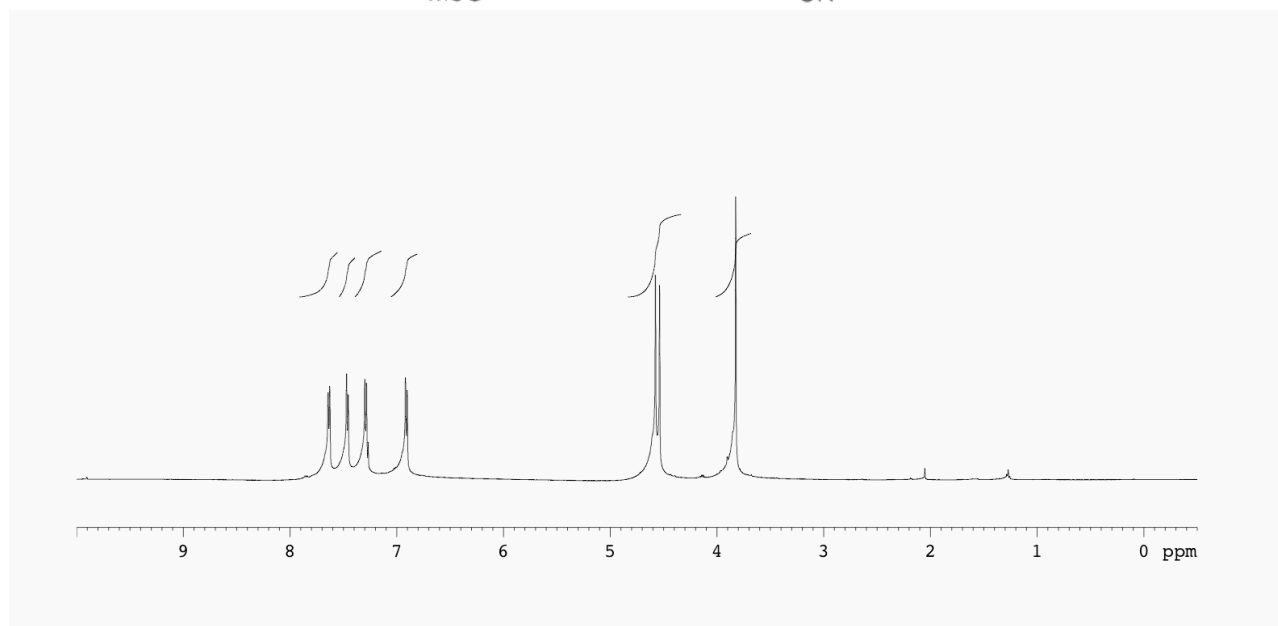

$^1\text{H}$  NMR (500 MHz,  $\text{CDCl}_3$ ) Spectrum of 4-((4-Methoxybenzyloxy)methyl)benzonitrile (**4b**)

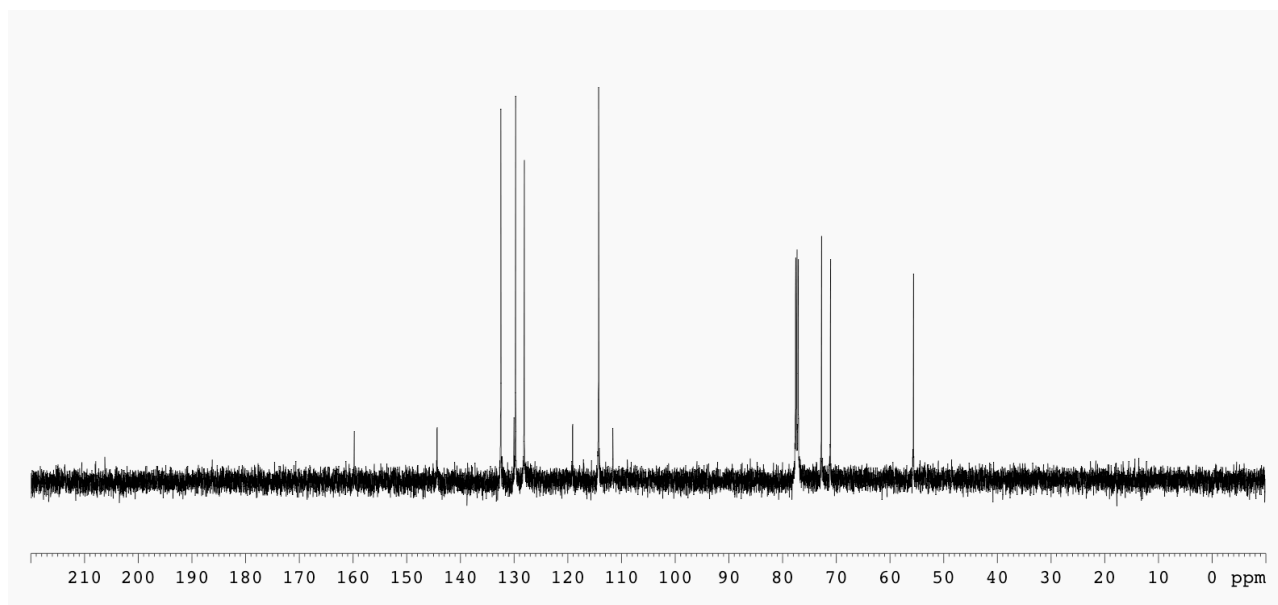

$^{13}\text{C}$  NMR (125.8 MHz,  $\text{CDCl}_3$ ) Spectrum of 4-((4-Methoxybenzyloxy)methyl)benzonitrile (**4b**)



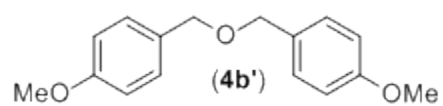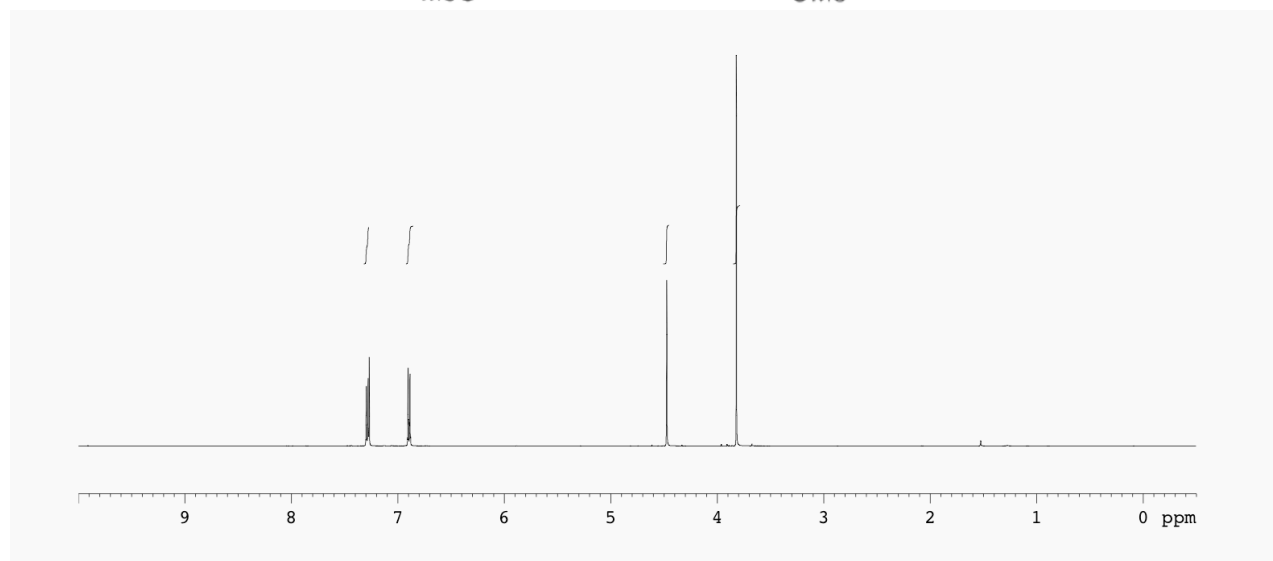

<sup>1</sup>H NMR (500 MHz, CDCl<sub>3</sub>) Spectrum of  
4,4'-Oxybis(methylene)bis(methoxybenzene) (4b')

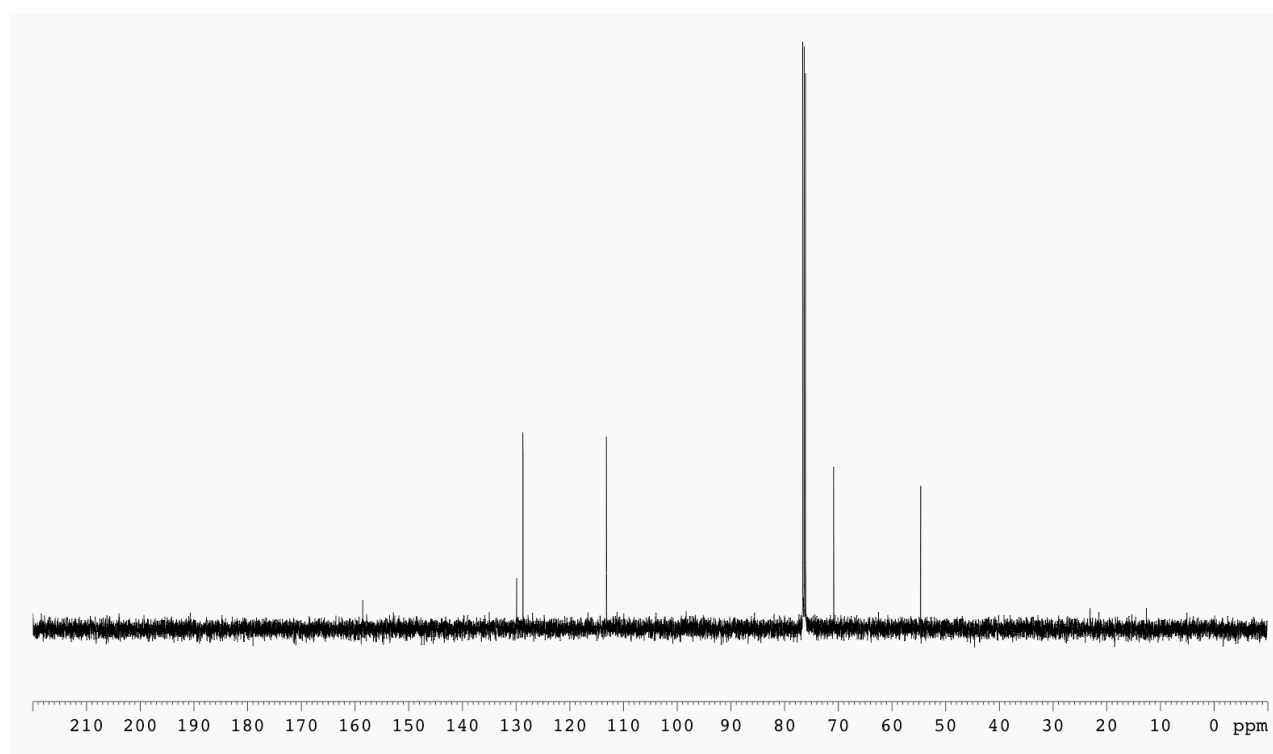

<sup>13</sup>C NMR (125.8 MHz, CDCl<sub>3</sub>) Spectrum of  
4,4'-Oxybis(methylene)bis(methoxybenzene) (4b')

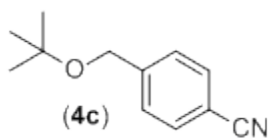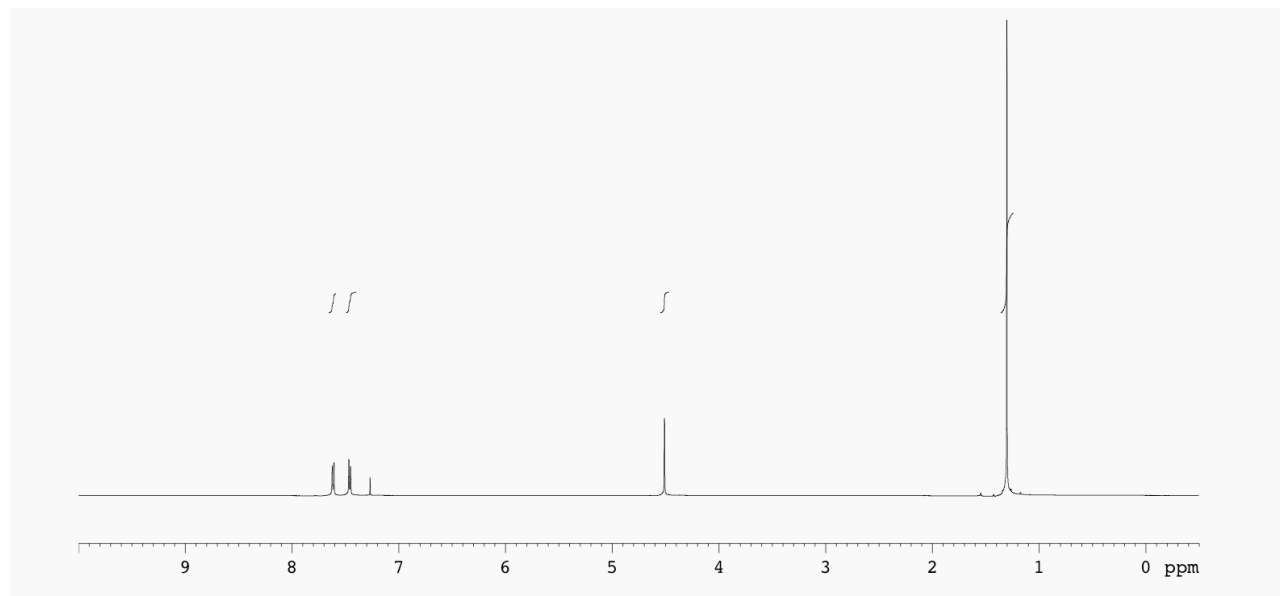

<sup>1</sup>H NMR (500 MHz, CDCl<sub>3</sub>) Spectrum of  
4-(*tert*-Butoxymethyl)benzonitrile (4c)

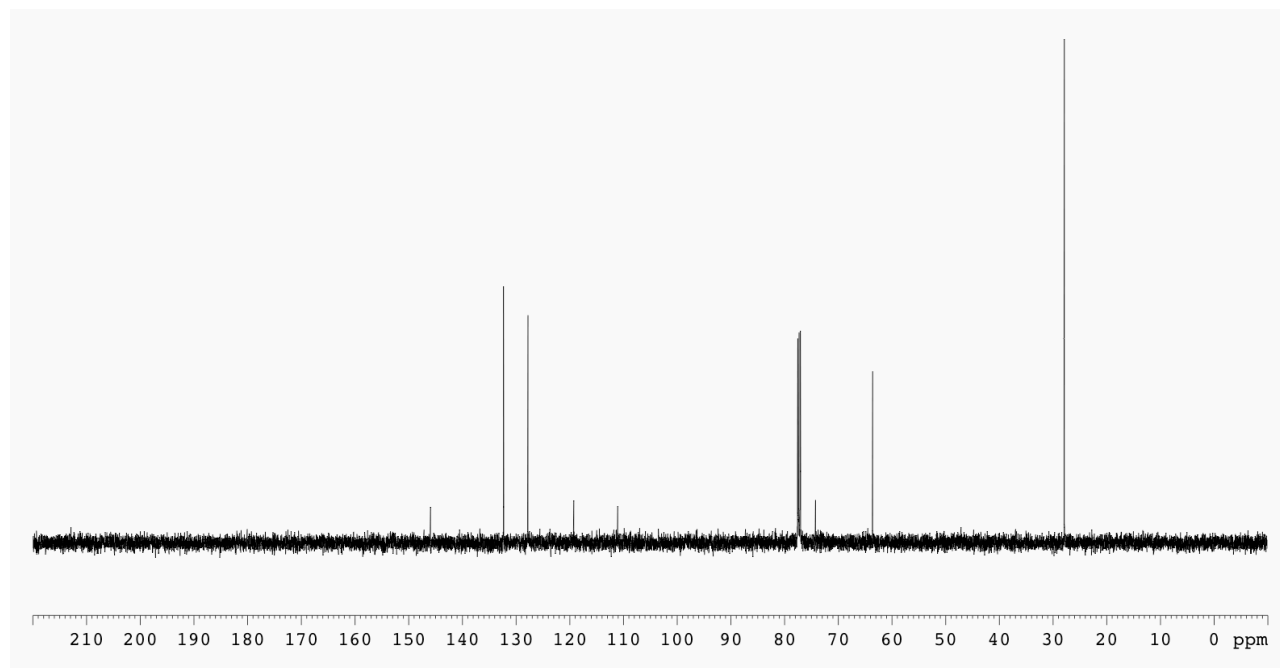

<sup>13</sup>C NMR (125.8 MHz, CDCl<sub>3</sub>) Spectrum of  
4-(*tert*-Butoxymethyl)benzonitrile (4c)

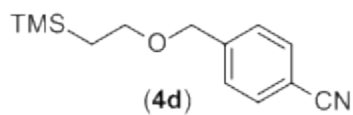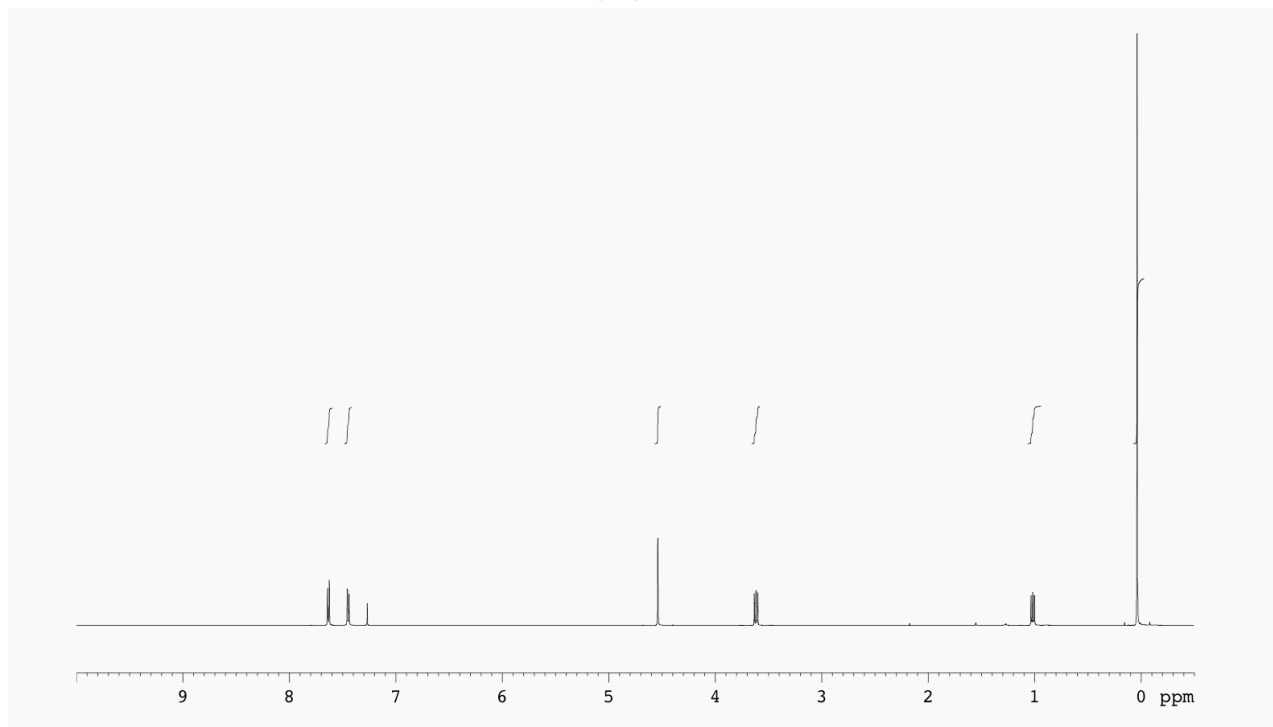

<sup>1</sup>H NMR (500 MHz, CDCl<sub>3</sub>) Spectrum of  
4-((2-(Trimethylsilyl)ethoxy)methyl)benzonitrile (**4d**)

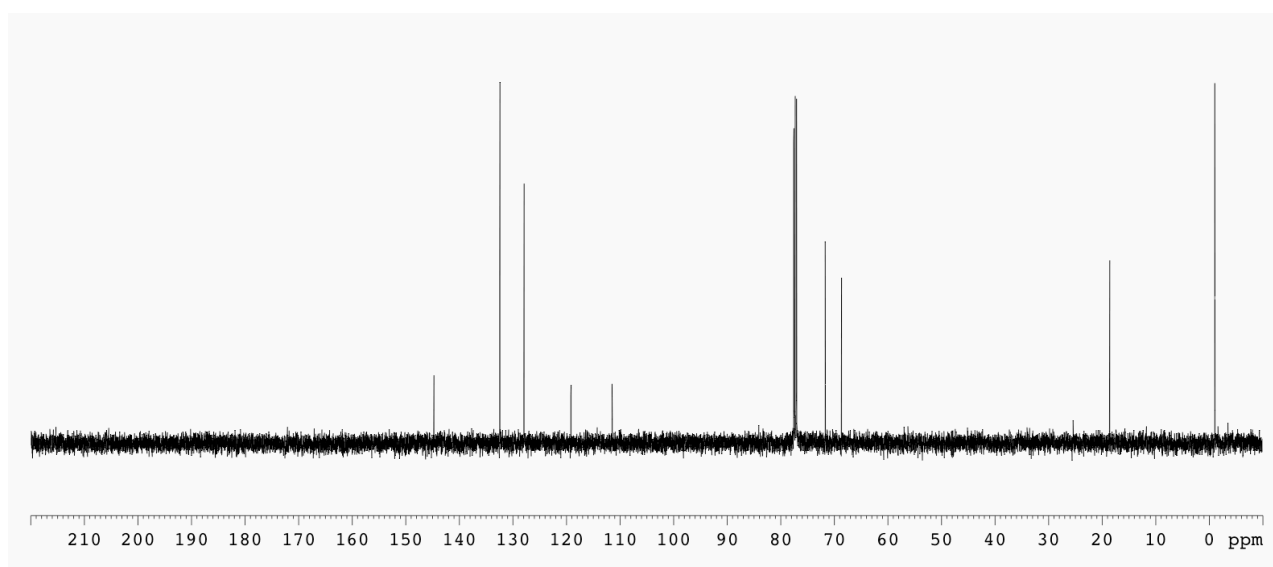

<sup>13</sup>C NMR (125.8 MHz, CDCl<sub>3</sub>) Spectrum of  
4-((2-(Trimethylsilyl)ethoxy)methyl)benzonitrile (**4d**)

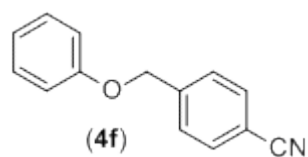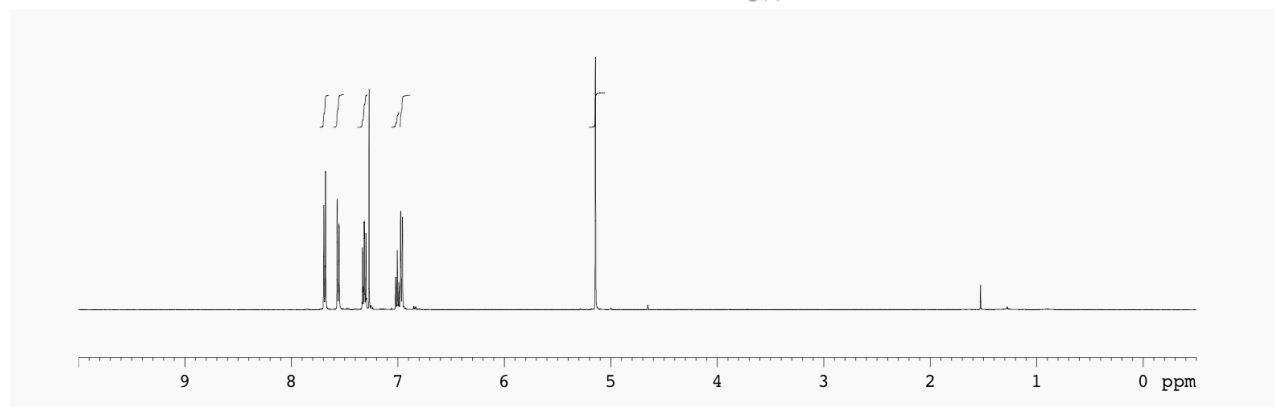

<sup>1</sup>H NMR (500 MHz, CDCl<sub>3</sub>) Spectrum of  
4-(Phenoxymethyl)benzonitrile (**4f**)

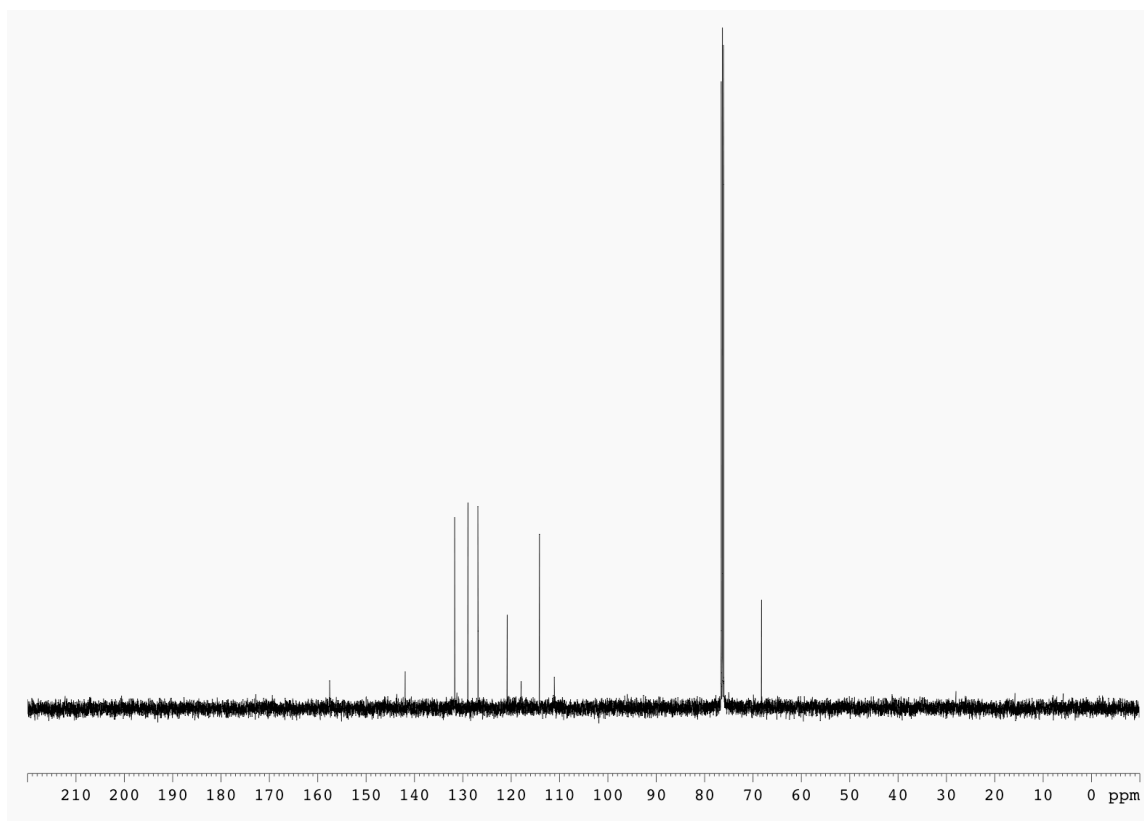

<sup>13</sup>C NMR (125.8 MHz, CDCl<sub>3</sub>) Spectrum of  
4-(Phenoxymethyl)benzonitrile (**4f**)

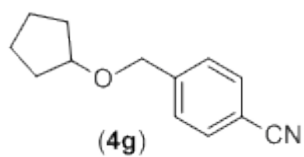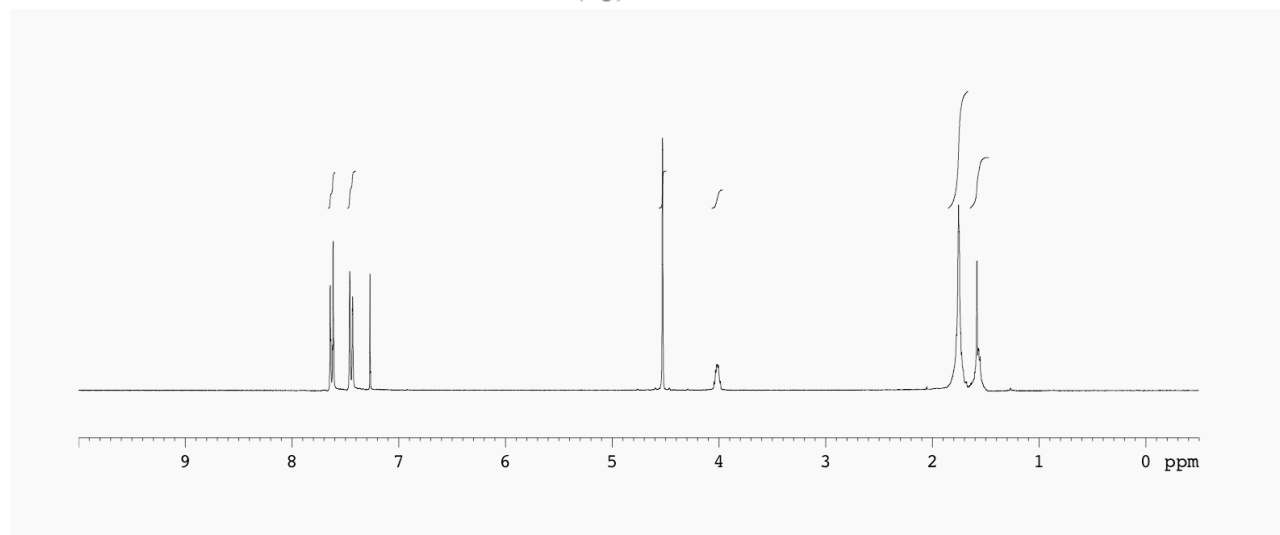

<sup>1</sup>H NMR (500 MHz, CDCl<sub>3</sub>) Spectrum of  
4-(Cyclopentyloxymethyl)benzonitrile (**4g**)

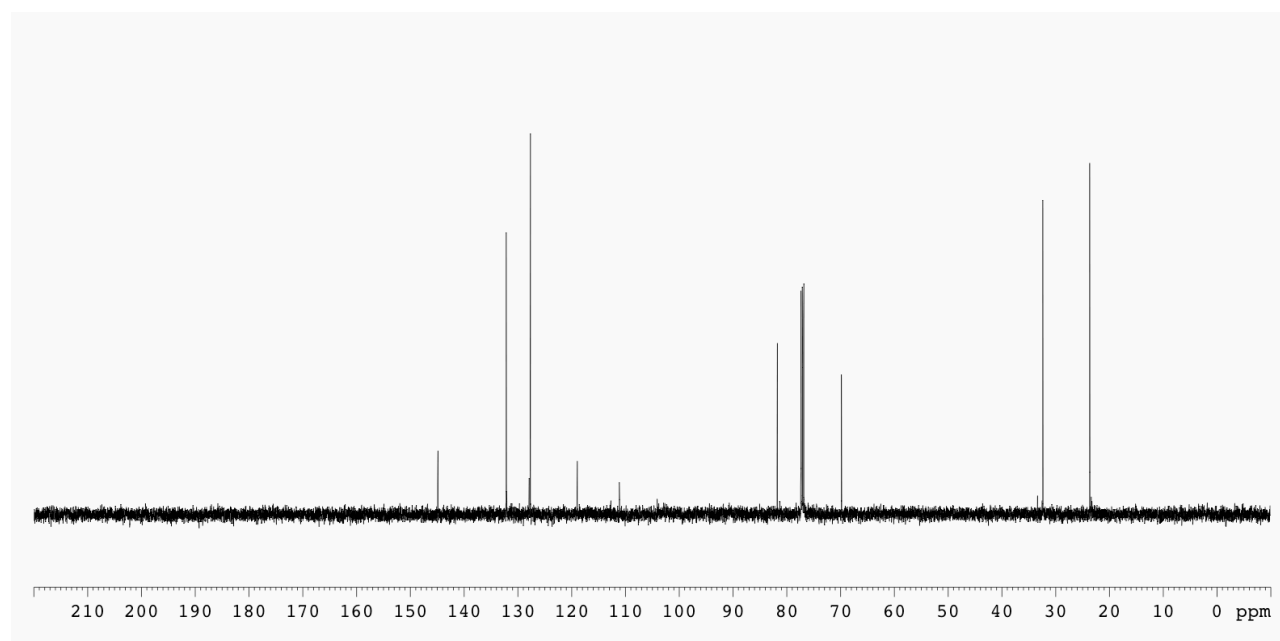

<sup>13</sup>C NMR (125.8 MHz, CDCl<sub>3</sub>) Spectrum of  
4-(Cyclopentyloxymethyl)benzonitrile (**4g**)

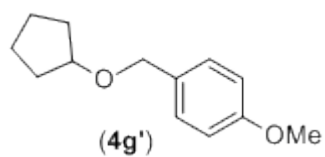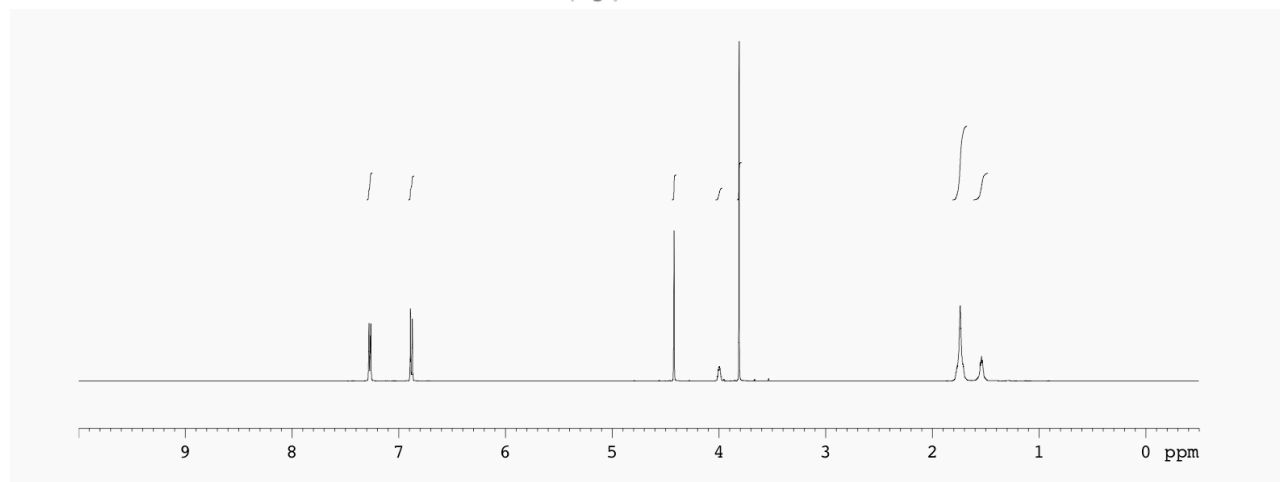

<sup>1</sup>H NMR (500 MHz, CDCl<sub>3</sub>) Spectrum of  
1-(Cyclopentyloxymethyl)-4-methoxybenzene (**4g'**)

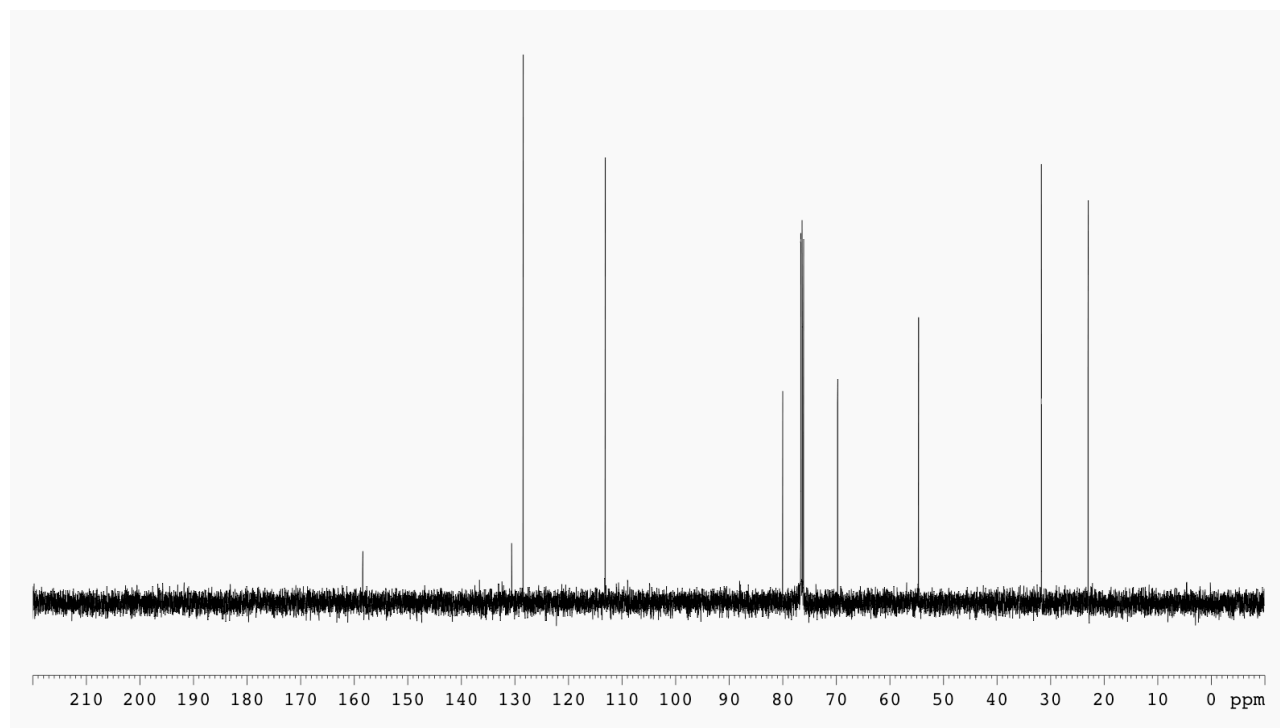

<sup>13</sup>C NMR (125.8 MHz, CDCl<sub>3</sub>) Spectrum of  
1-(Cyclopentyloxymethyl)-4-methoxybenzene (**4g'**)

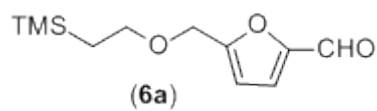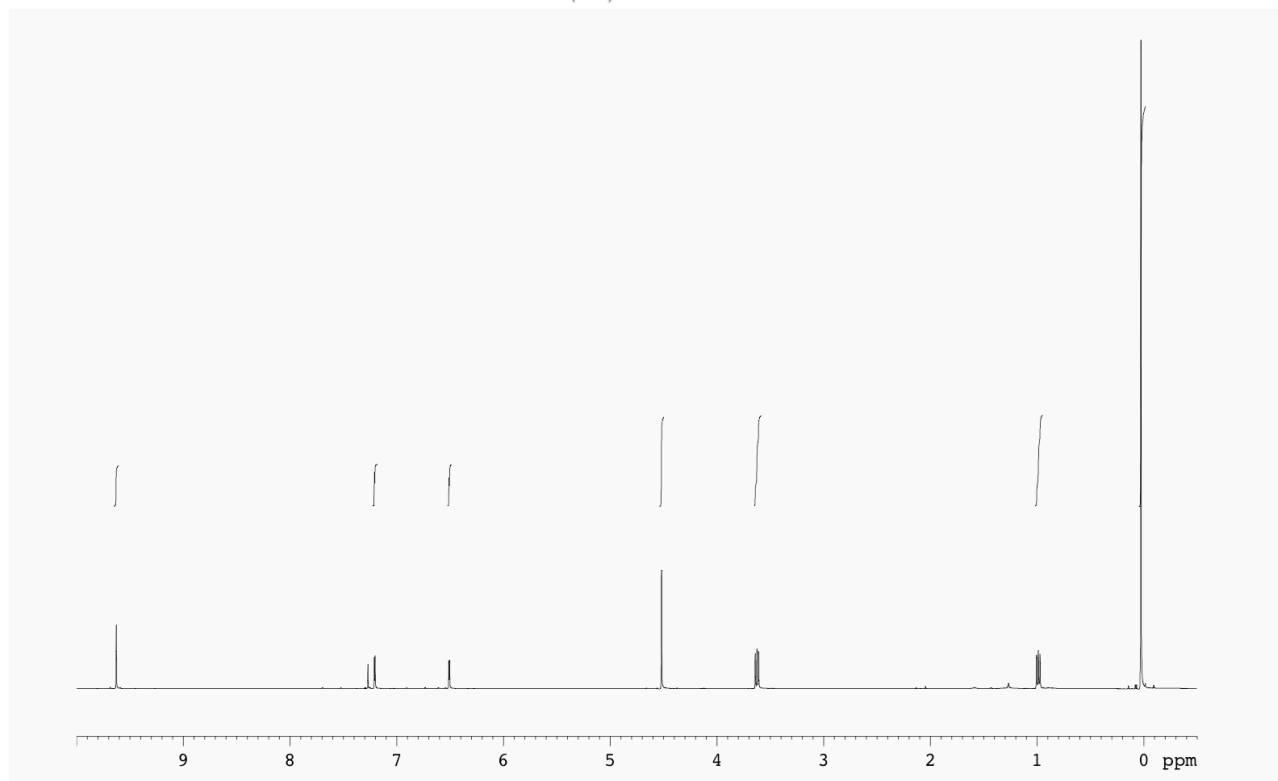

<sup>1</sup>H NMR (500 MHz, CDCl<sub>3</sub>) Spectrum of  
5-((2-(Trimethylsilyl)ethoxy)methyl)furan-2-carboxaldehyde (6a)

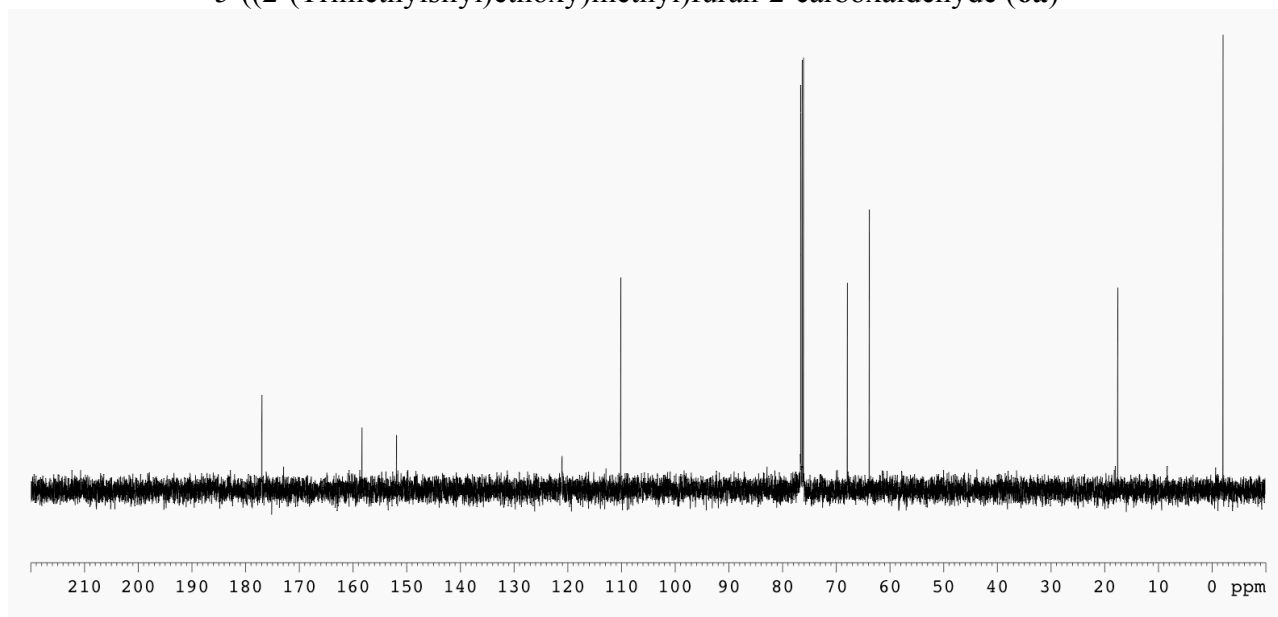

<sup>13</sup>C NMR (125.8 MHz, CDCl<sub>3</sub>) Spectrum of  
5-((2-(Trimethylsilyl)ethoxy)methyl)furan-2-carboxaldehyde (6a)

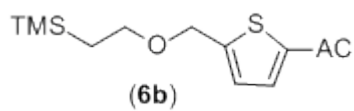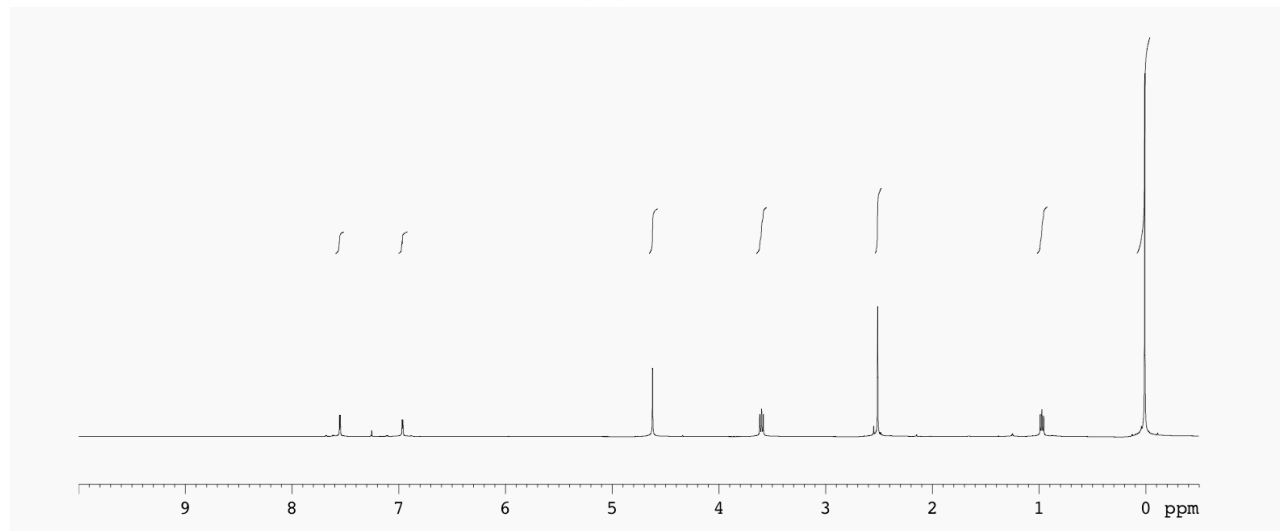

<sup>1</sup>H NMR (500 MHz, CDCl<sub>3</sub>) Spectrum of  
1-(5-((2-(Trimethylsilyl)ethoxy)methyl)thiophen-2-yl)ethanone (**6b**)

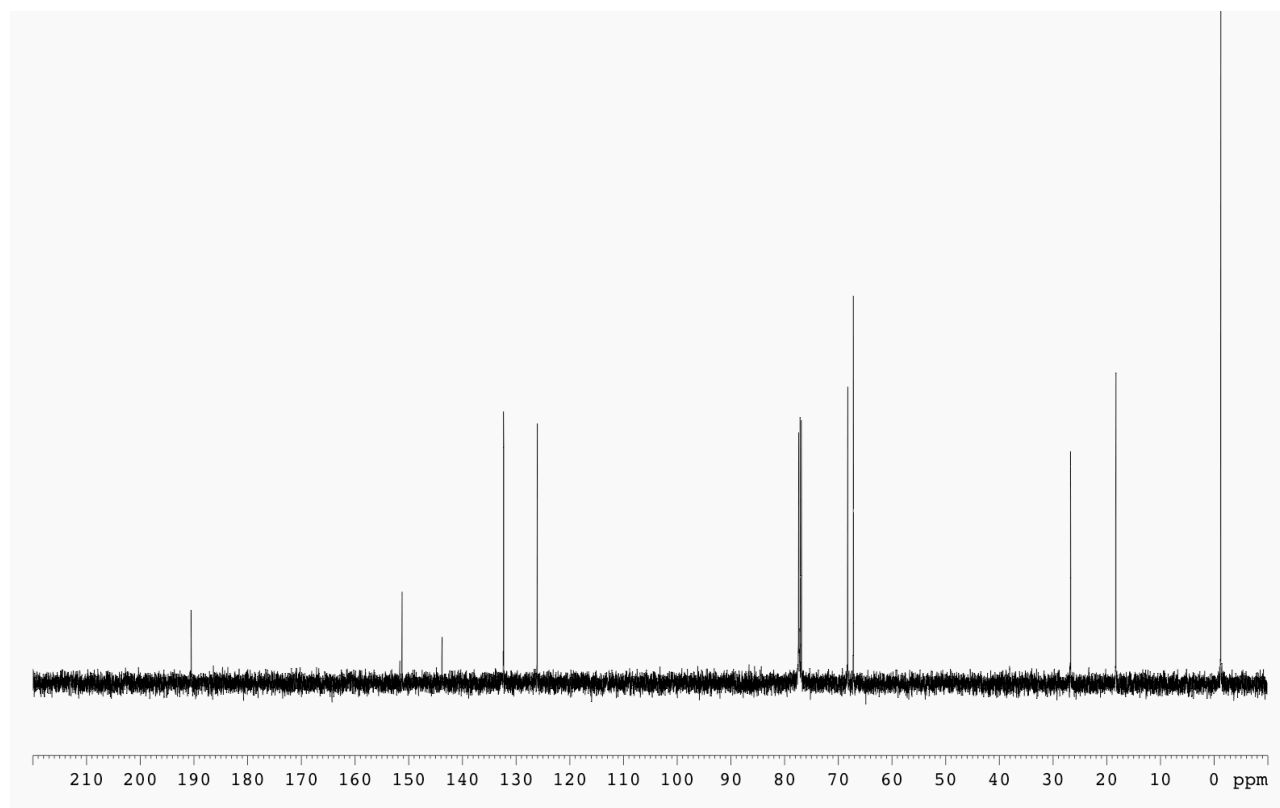

<sup>13</sup>C NMR (125.8 MHz, CDCl<sub>3</sub>) Spectrum of  
1-(5-((2-(Trimethylsilyl)ethoxy)methyl)thiophen-2-yl)ethanone (**6b**)



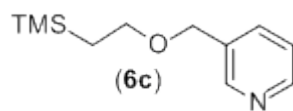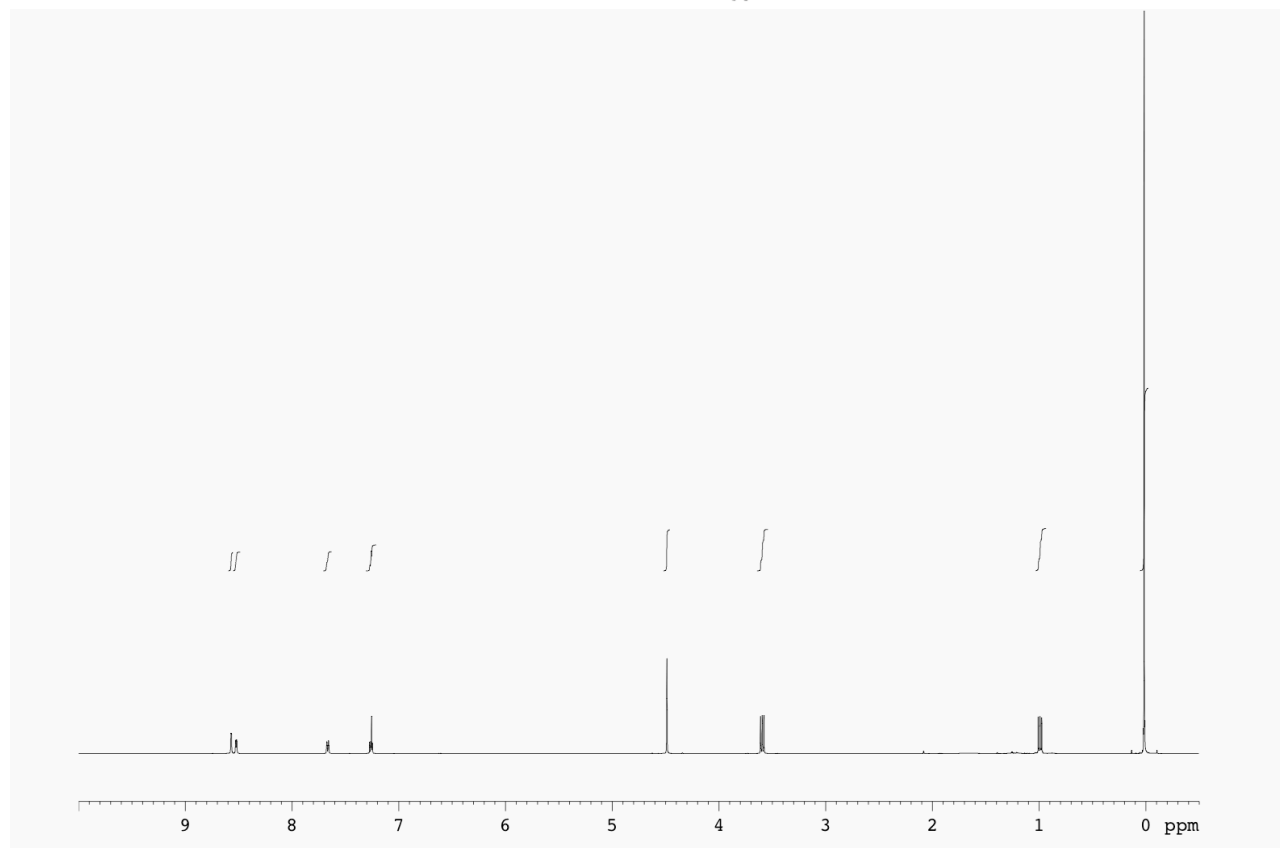

<sup>1</sup>H NMR (500 MHz, CDCl<sub>3</sub>) Spectrum of  
3-((2-(Trimethylsilyl)ethoxy)methyl)pyridine (6c)

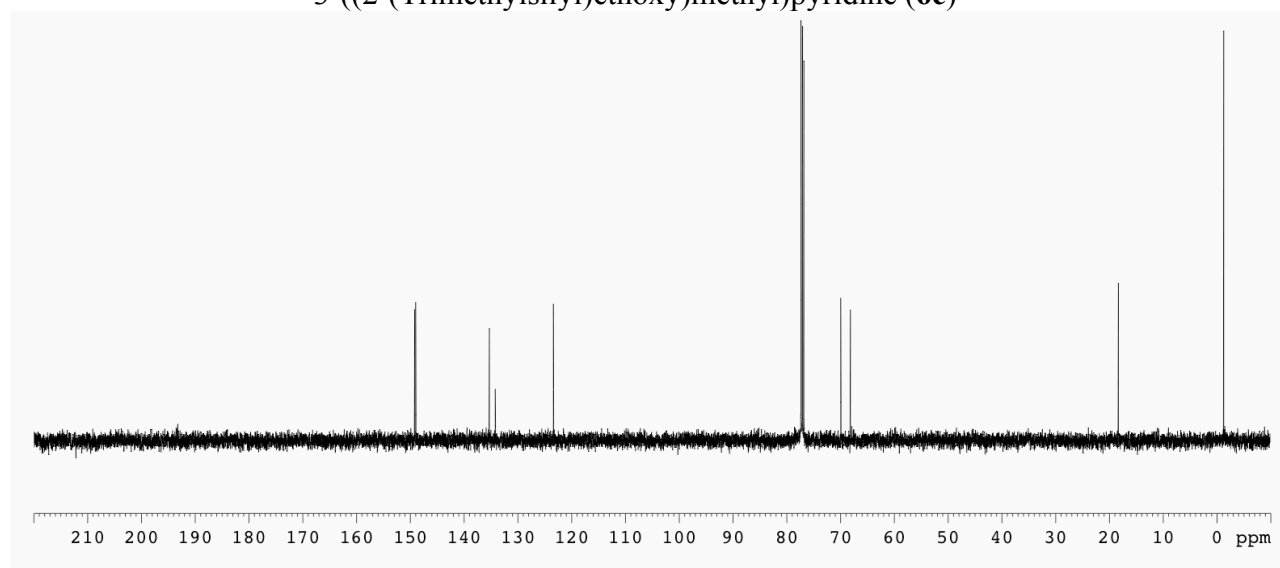

<sup>13</sup>C NMR (125.8 MHz, CDCl<sub>3</sub>) Spectrum of  
3-((2-(Trimethylsilyl)ethoxy)methyl)pyridine (6c)

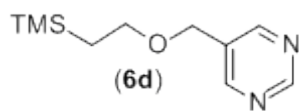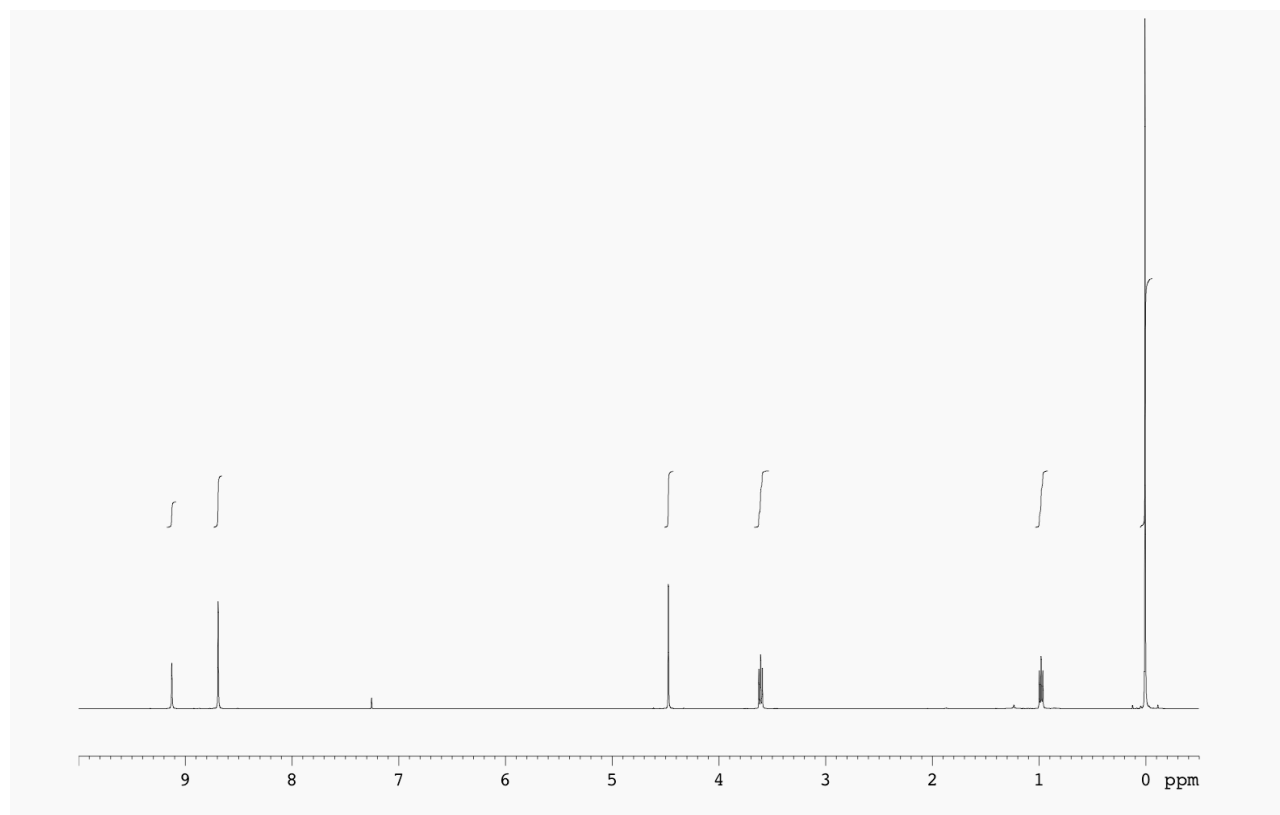

<sup>1</sup>H NMR (500 MHz, CDCl<sub>3</sub>) Spectrum of 5-((2-(Trimethylsilyl)ethoxy)methyl)pyrimidine (**6d**)

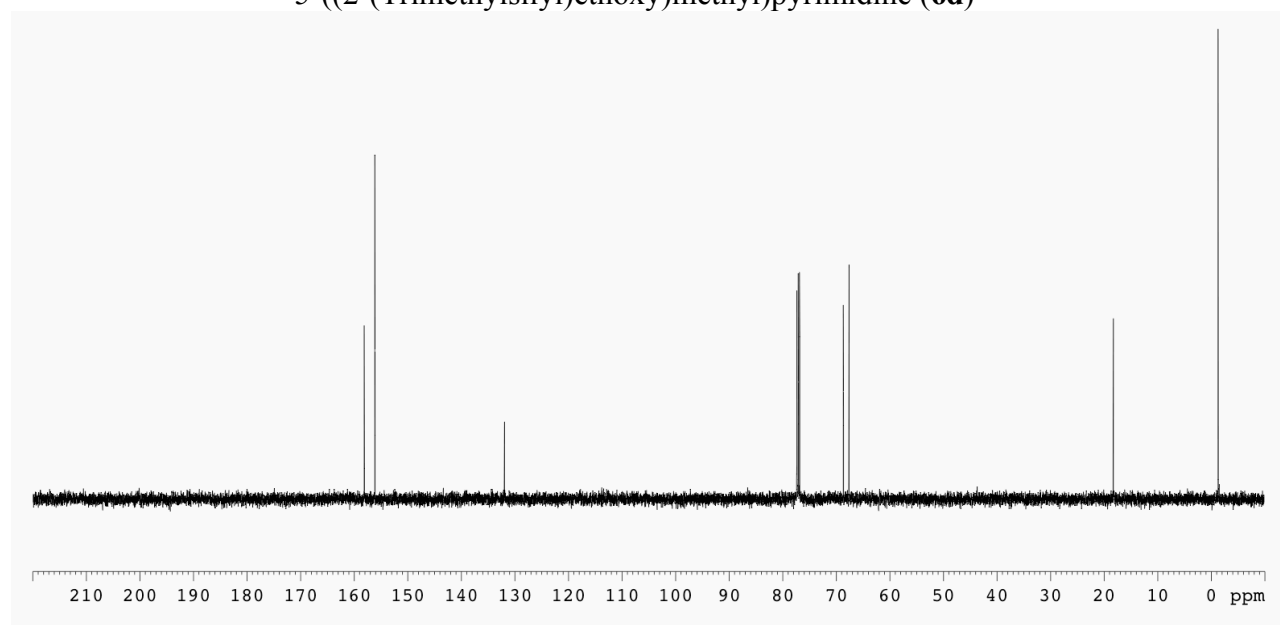

<sup>13</sup>C NMR (125.8 MHz, CDCl<sub>3</sub>) Spectrum of 5-((2-(Trimethylsilyl)ethoxy)methyl)pyrimidine (**6d**)

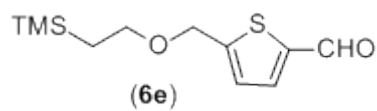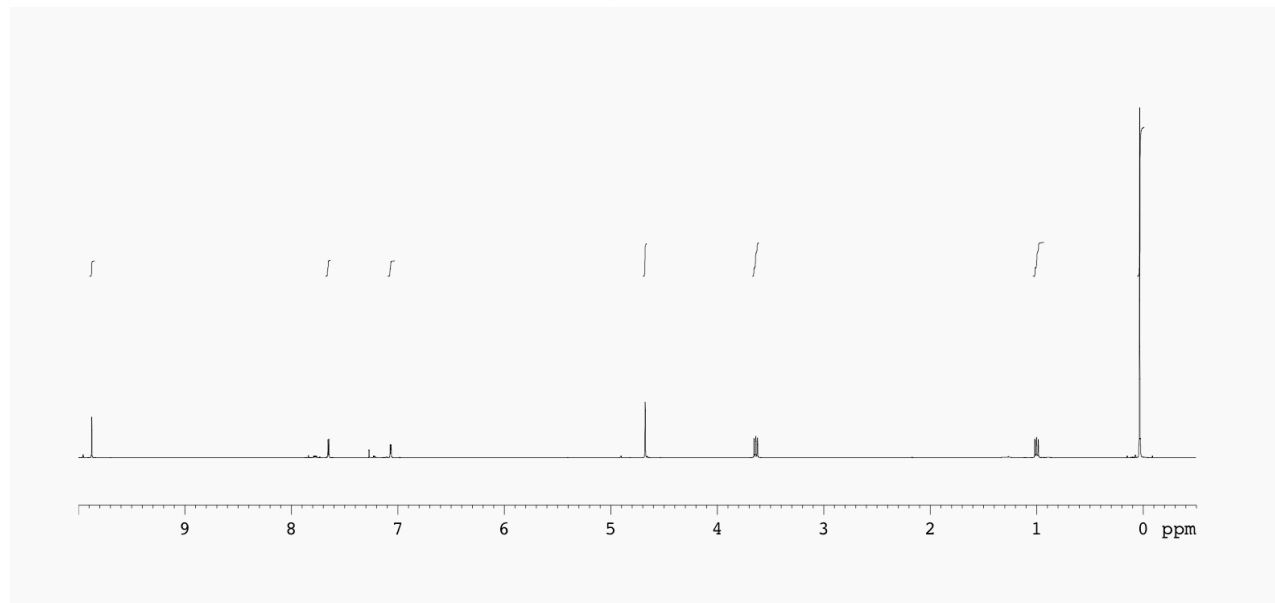

<sup>1</sup>H NMR (500 MHz, CDCl<sub>3</sub>) Spectrum of  
5-((2-(Trimethylsilyl)ethoxy)methyl)thiophene-2-carboxaldehyde (**6e**)

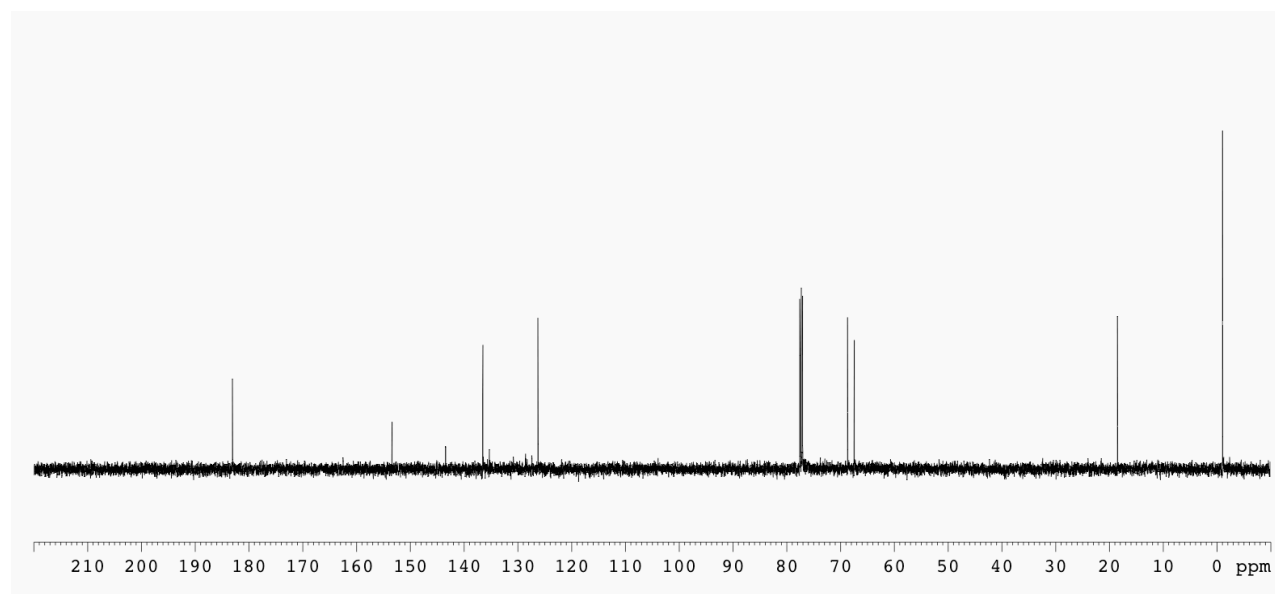

<sup>13</sup>C NMR (125.8 MHz, CDCl<sub>3</sub>) Spectrum of  
5-((2-(Trimethylsilyl)ethoxy)methyl)thiophene-2-carboxaldehyde (**6e**)
